# Supplementary material for: Seleno-Analogs of Scaffolds Resembling Natural Products a Novel Warhead toward Dual Compounds
Source: MDPI journal article supplement (doi:10.3390/antiox12010139), 2023-01-06
Supplement: s1 [file s1]

# Seleno-Analogs of Scaffolds Resembling Natural Products a

## Novel Warhead toward Dual Compounds

Nora Astrain-Redin <sup>1</sup>, Irene Talavera <sup>1</sup>, Esther Moreno <sup>1</sup>, María J. Ramírez <sup>2,\*</sup>, Nuria Martínez-Sáez <sup>1</sup>, Ignacio Encío <sup>3</sup>, Arun K. Sharma <sup>4</sup>, Carmen Sanmartín <sup>1</sup>, Daniel Plano <sup>1,\*</sup>

<sup>1</sup> Departamento de Tecnología y Química Farmacéuticas, Facultad de Farmacia y Nutrición, Universidad de Navarra, Irunlarrea 1, E-31008 Pamplona, Spain

<sup>2</sup> Departamento de Farmacología y Toxicología, Facultad de Farmacia y Nutrición, Universidad de Navarra, Irunlarrea 1, E-31008 Pamplona, Spain

<sup>3</sup> Departamento de Ciencias de la Salud, Universidad Pública de Navarra, Avda. Barañain s/n, E-31008 Pamplona, Spain

<sup>4</sup> Department of Pharmacology, Penn State Cancer Institute, CH72, Penn State College of Medicine, 500 University Drive, Hershey, PA 17033, USA

\* Correspondence: mariaja@unav.es (M.J.R.); dplano@unav.es (D.P.)

### Table of Contents

| Biological evaluation                                            |                 |
|------------------------------------------------------------------|-----------------|
| Cytotoxicity screening                                           | Table S1        |
| DPPH radical scavenging assay                                    | Table S2-S3     |
| NCI-60 Analysis                                                  |                 |
| 14a (One-Dose Assay)                                             | Figure S1       |
| 17a (One-Dose Assay)                                             | Figure S2       |
| 14a (Five-Dose Assay)                                            | Figure S3       |
| 17a (Five-Dose Assay)                                            | Figure S4       |
| Spectroscopic characterization                                   |                 |
| <sup>1</sup> H, <sup>13</sup> C and <sup>77</sup> Se NMR spectra | Figures S5-S119 |

**Table S1.** Cell growth % at 10  $\mu$ M for the compounds **1a-19a** and **1b-19b** in HTB-54, DU-145, HT-29, and MDA-MB-231.

| Comp.<br>Series a | Cancer cell lines |                 |                 |                 | Comp.<br>Series b | Cancer cell lines |                 |                 |                 |
|-------------------|-------------------|-----------------|-----------------|-----------------|-------------------|-------------------|-----------------|-----------------|-----------------|
|                   | HTB-54            | MDA-MB-231      | DU-145          | HT-29           |                   | HTB-54            | MDA-MB-231      | DU-145          | HT-29           |
| <b>1a</b>         | 72.1 $\pm$ 8.1    | 92.6 $\pm$ 12.7 | > 100           | 91.0 $\pm$ 3.6  | <b>1b</b>         | 86.0 $\pm$ 11.6   | 71.3 $\pm$ 8.0  | 62.7 $\pm$ 7.7  | 87.9 $\pm$ 12.1 |
| <b>2a</b>         | 43.2 $\pm$ 9.0    | 37.9 $\pm$ 3.6  | 65.6 $\pm$ 5.6  | 85.3 $\pm$ 19.4 | <b>2b</b>         | 78.3 $\pm$ 11.4   | 79.3 $\pm$ 18.7 | 72.9 $\pm$ 13.6 | 78.3 $\pm$ 6.9  |
| <b>3a</b>         | 37.5 $\pm$ 7.3    | 29.7 $\pm$ 6.4  | 39.8 $\pm$ 6.3  | 63.2 $\pm$ 16.9 | <b>3b</b>         | > 100             | 93.2 $\pm$ 10.2 | 41.6 $\pm$ 3.5  | 81.8 $\pm$ 15.2 |
| <b>4a</b>         | 67.6 $\pm$ 15.1   | 97.3 $\pm$ 10.4 | > 100           | 33.6 $\pm$ 12.6 | <b>4b</b>         | 57.8 $\pm$ 8.1    | 62.6 $\pm$ 7.4  | 19.7 $\pm$ 2.2  | 50.6 $\pm$ 7.8  |
| <b>5a</b>         | 46.1 $\pm$ 5.6    | 91.1 $\pm$ 16.8 | 83.3 $\pm$ 7.8  | 87.6 $\pm$ 7.9  | <b>5b</b>         | 79.8 $\pm$ 7.7    | 64.8 $\pm$ 14.7 | 70.5 $\pm$ 11.5 | 80.8 $\pm$ 8.5  |
| <b>6a</b>         | 36.3 $\pm$ 7.0    | 35.9 $\pm$ 2.6  | 26.9 $\pm$ 4.4  | 63.7 $\pm$ 12.3 | <b>6b</b>         | 83.4 $\pm$ 7.7    | 78.9 $\pm$ 8.4  | 76.6 $\pm$ 12.0 | 77.3 $\pm$ 11.6 |
| <b>7a</b>         | 22.0 $\pm$ 5.1    | 35.3 $\pm$ 6.4  | 51.7 $\pm$ 9.8  | 64.3 $\pm$ 14.1 | <b>7b</b>         | 91.4 $\pm$ 6.6    | 91.3 $\pm$ 8.3  | 54.6 $\pm$ 4.5  | > 100           |
| <b>8a</b>         | 25.8 $\pm$ 5.2    | 37.1 $\pm$ 4.7  | 49.5 $\pm$ 6.6  | 62.2 $\pm$ 16.1 | <b>8b</b>         | 99.4 $\pm$ 16.2   | 92.9 $\pm$ 16.5 | 77.1 $\pm$ 13.9 | 87.7 $\pm$ 10.1 |
| <b>9a</b>         | 64.8 $\pm$ 8.5    | 89.4 $\pm$ 4.9  | 48.6 $\pm$ 6.2  | 99.5 $\pm$ 8.3  | <b>9b</b>         | 58.9 $\pm$ 7.8    | 70.2 $\pm$ 6.9  | 22.3 $\pm$ 2.7  | 76.0 $\pm$ 13.5 |
| <b>10a</b>        | 27.1 $\pm$ 11.2   | 41.3 $\pm$ 3.5  | 33.4 $\pm$ 6.4  | 61.5 $\pm$ 17.6 | <b>10b</b>        | 81.2 $\pm$ 11.6   | 62.5 $\pm$ 7.7  | 66.6 $\pm$ 8.7  | 80.2 $\pm$ 10.9 |
| <b>11a</b>        | 30.7 $\pm$ 6.2    | 34.1 $\pm$ 10.6 | 35.3 $\pm$ 5.8  | 79.8 $\pm$ 16.3 | <b>11b</b>        | 75.4 $\pm$ 15.5   | 99.0 $\pm$ 11.2 | 70.0 $\pm$ 4.5  | > 100           |
| <b>12a</b>        | 95.5 $\pm$ 5.9    | 96.8 $\pm$ 15.8 | 62.7 $\pm$ 4.7  | 70.7 $\pm$ 10.7 | <b>12b</b>        | 97.6 $\pm$ 7.1    | 92.5 $\pm$ 15.1 | 95.1 $\pm$ 12.3 | 81.3 $\pm$ 11.1 |
| <b>13a</b>        | 40.9 $\pm$ 4.9    | 77.1 $\pm$ 12.6 | 29.5 $\pm$ 4.3  | 88.8 $\pm$ 8.6  | <b>13b</b>        | 82.1 $\pm$ 7.6    | 52.3 $\pm$ 7.9  | 26.8 $\pm$ 5.5  | 70.2 $\pm$ 13.2 |
| <b>14a</b>        | 34.2 $\pm$ 6.2    | 38.8 $\pm$ 3.6  | 16.9 $\pm$ 8.6  | 53.9 $\pm$ 5.3  | <b>14b</b>        | 78.9 $\pm$ 9.0    | 52.3 $\pm$ 7.1  | 25.5 $\pm$ 6.2  | 65.6 $\pm$ 7.3  |
| <b>15a</b>        | 38.0 $\pm$ 7.1    | 38.0 $\pm$ 5.4  | 19.1 $\pm$ 7.0  | 49.0 $\pm$ 7.2  | <b>15b</b>        | 95.6 $\pm$ 5.7    | 59.7 $\pm$ 15.7 | 34.7 $\pm$ 6.3  | 59.3 $\pm$ 4.0  |
| <b>16a</b>        | 30.9 $\pm$ 6.7    | 33.8 $\pm$ 5.6  | 18.8 $\pm$ 6.3  | 49.9 $\pm$ 5.6  | <b>16b</b>        | > 100             | 29.8 $\pm$ 9.6  | 66.4 $\pm$ 4.4  | 65.7 $\pm$ 10.0 |
| <b>17a</b>        | 21.9 $\pm$ 6.5    | 26.5 $\pm$ 5.6  | 16.3 $\pm$ 8.4  | 38.7 $\pm$ 6.0  | <b>17b</b>        | 85.9 $\pm$ 5.1    | 59.1 $\pm$ 11.5 | 19.2 $\pm$ 4.0  | 66.3 $\pm$ 10.2 |
| <b>18a</b>        | 40.9 $\pm$ 18.5   | 85.9 $\pm$ 9.5  | 74.7 $\pm$ 13.7 | 71.5 $\pm$ 11.7 | <b>18b</b>        | 62.3 $\pm$ 8.3    | 99.0 $\pm$ 11.2 | 32.6 $\pm$ 4.6  | 66.5 $\pm$ 9.5  |
| <b>19a</b>        | 16.3 $\pm$ 7.6    | 81.6 $\pm$ 9.7  | 17.0 $\pm$ 2.9  | 46.0 $\pm$ 8.7  | <b>19b</b>        | 43.6 $\pm$ 18.4   | 92.8 $\pm$ 10.2 | 25.2 $\pm$ 2.2  | 61.6 $\pm$ 9.8  |

The cell growth % is presented as the mean  $\pm$  SD of three independent experiments performed in triplicates

**Table S2.** DPPH radical scavenging activity (%) for the compounds **1a-19a** and **1b-19b** at 0.03 mg/mL in the time range of 0, 5, 15, 30, 60, and 90 minutes.

| 0.03 mg/mL       | DPPH scavenging activity (%) |                |                |                |                |                |
|------------------|------------------------------|----------------|----------------|----------------|----------------|----------------|
| Compd.           | 0 min                        | 5 min          | 15 min         | 30 min         | 60 min         | 90 min         |
| <b>Asc. Acid</b> | 96.2 $\pm$ 0.4               | 96.0 $\pm$ 0.3 | 96.0 $\pm$ 0.2 | 96.1 $\pm$ 0.3 | 96.0 $\pm$ 0.1 | 96.0 $\pm$ 0.2 |
| <b>Trolox</b>    | 95.3 $\pm$ 0.2               | 95.7 $\pm$ 0.1 | 95.6 $\pm$ 0.2 | 95.7 $\pm$ 0.2 | 95.9 $\pm$ 0.2 | 95.7 $\pm$ 0.2 |
| <b>1a</b>        | 1.7 $\pm$ 1.3                | 1.6 $\pm$ 1.1  | 3.4 $\pm$ 8.8  | 6.0 $\pm$ 4.9  | 9.9 $\pm$ 1.1  | 9.6 $\pm$ 0.4  |
| <b>2a</b>        | 3.7 $\pm$ 0.7                | 3.0 $\pm$ 0.6  | 9.5 $\pm$ 0.3  | 9.6 $\pm$ 0.1  | 8.8 $\pm$ 0.9  | 9.0 $\pm$ 1.2  |
| <b>3a</b>        | 3.6 $\pm$ 1.6                | 3.1 $\pm$ 1.2  | 7.9 $\pm$ 0.8  | 8.1 $\pm$ 0.8  | 8.0 $\pm$ 1.3  | 7.8 $\pm$ 1.7  |
| <b>4a</b>        | 0.0 $\pm$ 2.4                | 0.0 $\pm$ 2.3  | 0.0 $\pm$ 2.8  | 0.0 $\pm$ 2.4  | 0.0 $\pm$ 2.4  | 0.0 $\pm$ 2.3  |
| <b>5a</b>        | 2.6 $\pm$ 1.5                | 2.3 $\pm$ 1.1  | 3.1 $\pm$ 3.9  | 2.7 $\pm$ 3.6  | 3.5 $\pm$ 5.2  | 3.6 $\pm$ 5.3  |
| <b>6a</b>        | 2.3 $\pm$ 1.1                | 1.6 $\pm$ 1.0  | 2.7 $\pm$ 4.2  | 2.1 $\pm$ 4.4  | 2.4 $\pm$ 5.6  | 2.4 $\pm$ 5.6  |
| <b>7a</b>        | 3.4 $\pm$ 1.5                | 2.9 $\pm$ 1.1  | 5.8 $\pm$ 1.7  | 5.7 $\pm$ 1.9  | 6.1 $\pm$ 2.9  | 6.3 $\pm$ 2.9  |
| <b>8a</b>        | 1.8 $\pm$ 0.2                | 2.0 $\pm$ 0.1  | 3.7 $\pm$ 4.8  | 3.5 $\pm$ 4.7  | 3.8 $\pm$ 6.2  | 3.7 $\pm$ 6.6  |
| <b>9a</b>        | 3.3 $\pm$ 0.9                | 2.7 $\pm$ 0.7  | 7.8 $\pm$ 9.6  | 7.4 $\pm$ 9.3  | 7.6 $\pm$ 10.0 | 7.8 $\pm$ 10.4 |
| <b>10a</b>       | 3.5 $\pm$ 0.2                | 2.4 $\pm$ 0.2  | 6.8 $\pm$ 8.5  | 7.2 $\pm$ 8.4  | 8.0 $\pm$ 6.2  | 8.6 $\pm$ 6.8  |
| <b>11a</b>       | 3.1 $\pm$ 1.1                | 2.6 $\pm$ 0.8  | 4.9 $\pm$ 5.9  | 5.4 $\pm$ 5.7  | 5.1 $\pm$ 6.6  | 4.6 $\pm$ 7.5  |
| <b>12a</b>       | 1.6 $\pm$ 0.9                | 1.3 $\pm$ 0.6  | 7.3 $\pm$ 4.7  | 6.7 $\pm$ 6.0  | 7.2 $\pm$ 4.5  | 6.1 $\pm$ 6.7  |
| <b>13a</b>       | 0.0 $\pm$ 0.4                | 0.0 $\pm$ 0.4  | 4.7 $\pm$ 1.5  | 8.5 $\pm$ 0.7  | 16.2 $\pm$ 0.7 | 22.4 $\pm$ 0.8 |
| <b>14a</b>       | 0.0 $\pm$ 1.4                | 0.0 $\pm$ 2.2  | 0.0 $\pm$ 2.3  | 0.0 $\pm$ 1.9  | 0.0 $\pm$ 1.5  | 0.0 $\pm$ 1.4  |
| <b>15a</b>       | 0.0 $\pm$ 3.5                | 0.0 $\pm$ 4.2  | 0.0 $\pm$ 2.9  | 0.0 $\pm$ 3.8  | 0.0 $\pm$ 3.5  | 0.0 $\pm$ 3.5  |
| <b>16a</b>       | 0.0 $\pm$ 3.9                | 0.0 $\pm$ 5.0  | 0.0 $\pm$ 3.6  | 0.0 $\pm$ 4.7  | 0.0 $\pm$ 4.2  | 0.0 $\pm$ 3.9  |
| <b>17a</b>       | 0.0 $\pm$ 3.5                | 0.0 $\pm$ 4.4  | 0.0 $\pm$ 3.3  | 0.0 $\pm$ 3.2  | 0.0 $\pm$ 3.8  | 0.0 $\pm$ 3.1  |
| <b>18a</b>       | 0.0 $\pm$ 3.0                | 0.0 $\pm$ 3.8  | 0.0 $\pm$ 4.0  | 0.0 $\pm$ 3.7  | 0.0 $\pm$ 3.5  | 0.0 $\pm$ 3.5  |
| <b>19a</b>       | 0.0 $\pm$ 3.7                | 0.0 $\pm$ 3.8  | 1.6 $\pm$ 4.6  | 0.0 $\pm$ 4.5  | 0.0 $\pm$ 4.4  | 0.0 $\pm$ 4.2  |
| <b>1b</b>        | 0.0 $\pm$ 0.1                | 5.7 $\pm$ 5.2  | 5.5 $\pm$ 4.9  | 0.8 $\pm$ 4.7  | 1.6 $\pm$ 4.3  | 2.9 $\pm$ 2.2  |
| <b>2b</b>        | 0.2 $\pm$ 0.2                | 5.4 $\pm$ 6.2  | 5.1 $\pm$ 6.5  | 2.7 $\pm$ 1.0  | 4.1 $\pm$ 0.9  | 3.5 $\pm$ 0.9  |
| <b>3b</b>        | 0.0 $\pm$ 0.6                | 3.6 $\pm$ 6.7  | 4.0 $\pm$ 6.5  | 0.7 $\pm$ 1.7  | 1.5 $\pm$ 1.5  | 0.7 $\pm$ 1.6  |
| <b>4b</b>        | 1.8 $\pm$ 0.8                | 3.3 $\pm$ 1.6  | 4.1 $\pm$ 1.5  | 4.7 $\pm$ 9.8  | 4.4 $\pm$ 8.1  | 4.2 $\pm$ 8.0  |
| <b>5b</b>        | 0.0 $\pm$ 0.5                | 7.6 $\pm$ 2.1  | 8.0 $\pm$ 2.4  | 1.0 $\pm$ 2.1  | 2.3 $\pm$ 2.1  | 2.4 $\pm$ 2.0  |
| <b>6b</b>        | 0.0 $\pm$ 2.0                | 8.0 $\pm$ 1.1  | 8.3 $\pm$ 1.1  | 4.1 $\pm$ 3.6  | 4.9 $\pm$ 3.9  | 4.0 $\pm$ 3.3  |
| <b>7b</b>        | 0.0 $\pm$ 3.4                | 7.1 $\pm$ 2.2  | 7.6 $\pm$ 2.2  | 4.4 $\pm$ 0.8  | 6.4 $\pm$ 1.0  | 7.4 $\pm$ 0.7  |
| <b>8b</b>        | 0.0 $\pm$ 0.3                | 7.8 $\pm$ 2.7  | 8.4 $\pm$ 2.9  | 6.3 $\pm$ 1.5  | 7.5 $\pm$ 1.6  | 7.3 $\pm$ 1.7  |
| <b>9b</b>        | 0.0 $\pm$ 2.1                | 0.0 $\pm$ 2.1  | 0.0 $\pm$ 2.2  | 0.0 $\pm$ 2.2  | 0.0 $\pm$ 2.3  | 0.0 $\pm$ 2.1  |
| <b>10b</b>       | 0.0 $\pm$ 3.4                | 0.0 $\pm$ 3.5  | 0.0 $\pm$ 3.6  | 0.0 $\pm$ 3.5  | 0.0 $\pm$ 3.3  | 0.0 $\pm$ 3.2  |
| <b>11b</b>       | 1.3 $\pm$ 0.3                | 4.2 $\pm$ 3.1  | 4.2 $\pm$ 3.3  | 3.8 $\pm$ 0.6  | 5.9 $\pm$ 3.0  | 5.4 $\pm$ 2.3  |
| <b>12b</b>       | 0.0 $\pm$ 1.1                | 0.0 $\pm$ 0.7  | 0.0 $\pm$ 1.6  | 0.0 $\pm$ 1.3  | 1.0 $\pm$ 1.6  | 1.9 $\pm$ 2.0  |
| <b>13b</b>       | 0.0 $\pm$ 0.9                | 0.0 $\pm$ 1.2  | 0.4 $\pm$ 1.2  | 1.0 $\pm$ 1.3  | 3.8 $\pm$ 1.2  | 4.6 $\pm$ 1.1  |
| <b>14b</b>       | 0.0 $\pm$ 0.6                | 0.0 $\pm$ 0.6  | 0.0 $\pm$ 1.2  | 0.0 $\pm$ 0.6  | 0.0 $\pm$ 0.6  | 0.0 $\pm$ 0.5  |
| <b>15b</b>       | 0.0 $\pm$ 0.4                | 0.0 $\pm$ 0.7  | 0.0 $\pm$ 1.5  | 0.0 $\pm$ 0.4  | 0.0 $\pm$ 0.5  | 0.0 $\pm$ 1.0  |
| <b>16b</b>       | 0.0 $\pm$ 0.9                | 0.0 $\pm$ 0.4  | 0.0 $\pm$ 0.6  | 0.0 $\pm$ 0.5  | 0.0 $\pm$ 0.4  | 0.0 $\pm$ 0.6  |
| <b>17b</b>       | 0.0 $\pm$ 0.9                | 0.0 $\pm$ 0.8  | 0.0 $\pm$ 1.3  | 0.0 $\pm$ 1.1  | 0.0 $\pm$ 1.1  | 0.0 $\pm$ 1.5  |
| <b>18b</b>       | 0.0 $\pm$ 1.4                | 0.0 $\pm$ 1.5  | 0.0 $\pm$ 1.7  | 0.0 $\pm$ 1.1  | 0.0 $\pm$ 1.3  | 0.0 $\pm$ 1.6  |
| <b>19b</b>       | 0.0 $\pm$ 1.0                | 0.0 $\pm$ 0.9  | 0.0 $\pm$ 0.8  | 0.0 $\pm$ 1.0  | 0.0 $\pm$ 1.0  | 0.0 $\pm$ 0.9  |

The percentage of inhibition of DPPH is presented as the mean  $\pm$  SD of three independent experiments performed in triplicates.

**Table S3.** DPPH radical scavenging activity (%) for compound **13a** at five different concentrations (0.3 – 0.0003 mg/mL) in the time range of 0, 5, 15, 30, 60, and 90 minutes.

|                  |               | DPPH scavenging activity (%) |            |            |            |            |            |            |            |            |
|------------------|---------------|------------------------------|------------|------------|------------|------------|------------|------------|------------|------------|
| Comp.            | Concentration | 0 min                        | 5 min      | 15 min     | 30 min     | 60 min     | 90 min     | 120 min    | 150 min    | 180 min    |
| <b>Asc. Acid</b> | 0.0003 mg/mL  | 3.9 ± 0.9                    | 3.3 ± 0.9  | 3.5 ± 0.8  | 3.4 ± 0.8  | 3.3 ± 1.1  | 3.1 ± 1.3  | 2.9 ± 1.5  | 2.2 ± 1.5  | 2.0 ± 1.9  |
|                  | 0.003 mg/mL   | 44.8 ± 0.8                   | 43.3 ± 2.4 | 43.5 ± 2.3 | 43.4 ± 2.2 | 43.2 ± 2.3 | 43.0 ± 2.3 | 42.8 ± 2.3 | 42.8 ± 2.3 | 42.1 ± 2.6 |
|                  | 0.03 mg/mL    | 96.4 ± 0.1                   | 93.4 ± 5.1 | 93.6 ± 5.2 | 93.6 ± 5.4 | 93.5 ± 5.4 | 93.5 ± 5.4 | 93.3 ± 5.3 | 93.3 ± 5.3 | 93.2 ± 5.5 |
|                  | 0.09 mg/mL    | 96.8 ± 0.4                   | 93.7 ± 5.4 | 94.0 ± 5.6 | 94.0 ± 5.8 | 93.7 ± 5.5 | 93.7 ± 5.5 | 93.6 ± 5.5 | 93.6 ± 5.5 | 93.5 ± 5.6 |
|                  | 0.3 mg/mL     | 96.9 ± 0.3                   | 93.7 ± 5.4 | 94.2 ± 5.3 | 94.0 ± 5.4 | 93.8 ± 5.4 | 93.7 ± 5.4 | 93.6 ± 5.4 | 93.5 ± 5.4 | 93.5 ± 5.5 |
| <b>Trolox</b>    | 0.0003 mg/mL  | 2.9 ± 0.6                    | 4.2 ± 3.3  | 3.6 ± 1.3  | 3.5 ± 1.1  | 3.3 ± 1.5  | 3.0 ± 1.7  | 2.8 ± 1.8  | 2.1 ± 2.0  | 1.8 ± 2.2  |
|                  | 0.003 mg/mL   | 31.6 ± 5.2                   | 32.2 ± 6.1 | 31.3 ± 6.0 | 30.8 ± 6.0 | 31.5 ± 5.6 | 31.2 ± 5.3 | 31.0 ± 5.2 | 30.4 ± 5.4 | 30.2 ± 5.2 |
|                  | 0.03 mg/mL    | 91.6 ± 1.2                   | 93.4 ± 5.7 | 93.5 ± 5.6 | 93.5 ± 5.5 | 93.4 ± 5.6 | 93.4 ± 5.6 | 93.3 ± 5.6 | 93.3 ± 5.7 | 93.2 ± 5.7 |
|                  | 0.09 mg/mL    | 96.6 ± 0.1                   | 93.6 ± 5.4 | 93.6 ± 5.3 | 93.5 ± 5.3 | 93.5 ± 5.4 | 93.4 ± 5.4 | 93.5 ± 5.5 | 93.4 ± 5.6 | 93.4 ± 5.6 |
|                  | 0.3 mg/mL     | 96.6 ± 0.1                   | 93.5 ± 5.3 | 93.5 ± 5.4 | 93.4 ± 5.4 | 93.4 ± 5.5 | 93.4 ± 5.4 | 93.4 ± 5.5 | 93.4 ± 5.7 | 93.4 ± 5.7 |
| <b>13a</b>       | 0.0003 mg/mL  | 0.0 ± 1.2                    | 0.0 ± 1.3  | 0.0 ± 1.4  | 0.3 ± 1.5  | 0.7 ± 1.7  | 1.0 ± 1.9  | 1.3 ± 2.1  | 1.3 ± 2.1  | 1.1 ± 2.3  |
|                  | 0.003 mg/mL   | 0.2 ± 0.7                    | 0.7 ± 1.0  | 2.2 ± 0.8  | 3.9 ± 0.8  | 6.5 ± 1.0  | 8.3 ± 1.2  | 9.8 ± 1.3  | 10.7 ± 1.6 | 11.8 ± 1.8 |
|                  | 0.03 mg/mL    | 0.4 ± 1.9                    | 4.5 ± 1.6  | 9.8 ± 1.7  | 15.5 ± 1.9 | 23.3 ± 2.5 | 28.7 ± 2.9 | 33.0 ± 3.2 | 36.3 ± 3.5 | 39.4 ± 3.8 |
|                  | 0.09 mg/mL    | 1.6 ± 1.4                    | 9.5 ± 1.3  | 18.0 ± 1.4 | 26.5 ± 1.8 | 37.5 ± 2.5 | 44.7 ± 2.9 | 50.3 ± 3.4 | 54.4 ± 3.8 | 58.0 ± 3.9 |
|                  | 0.3 mg/mL     | 5.7 ± 0.7                    | 19.8 ± 1.9 | 32.7 ± 2.1 | 44.2 ± 2.7 | 57.4 ± 3.4 | 65.0 ± 3.7 | 70.1 ± 3.9 | 73.7 ± 4.3 | 76.4 ± 4.3 |

The percentage of inhibition of DPPH is presented as the mean ± SD of three independent experiments performed in triplicates.

**Figure S1.** NCI-60 results at one dose (10  $\mu$ M) of compound **14a** after 48 h of treatment.

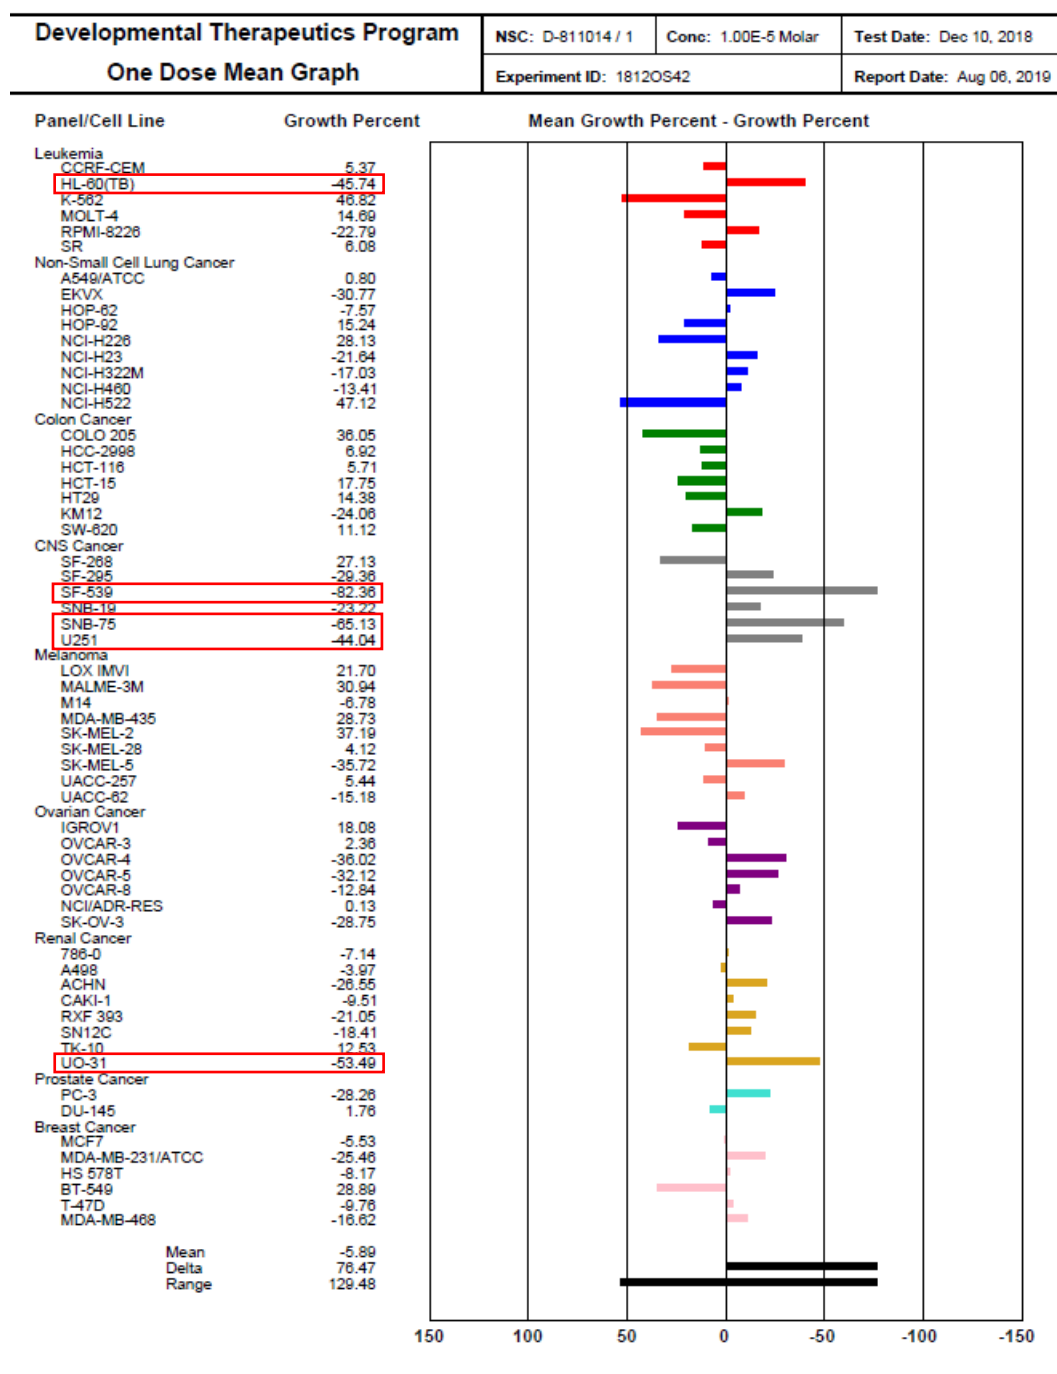



**Figure S2.** NCI-60 results at one dose (10  $\mu$ M) of compound **17a** after 48 h of treatment.

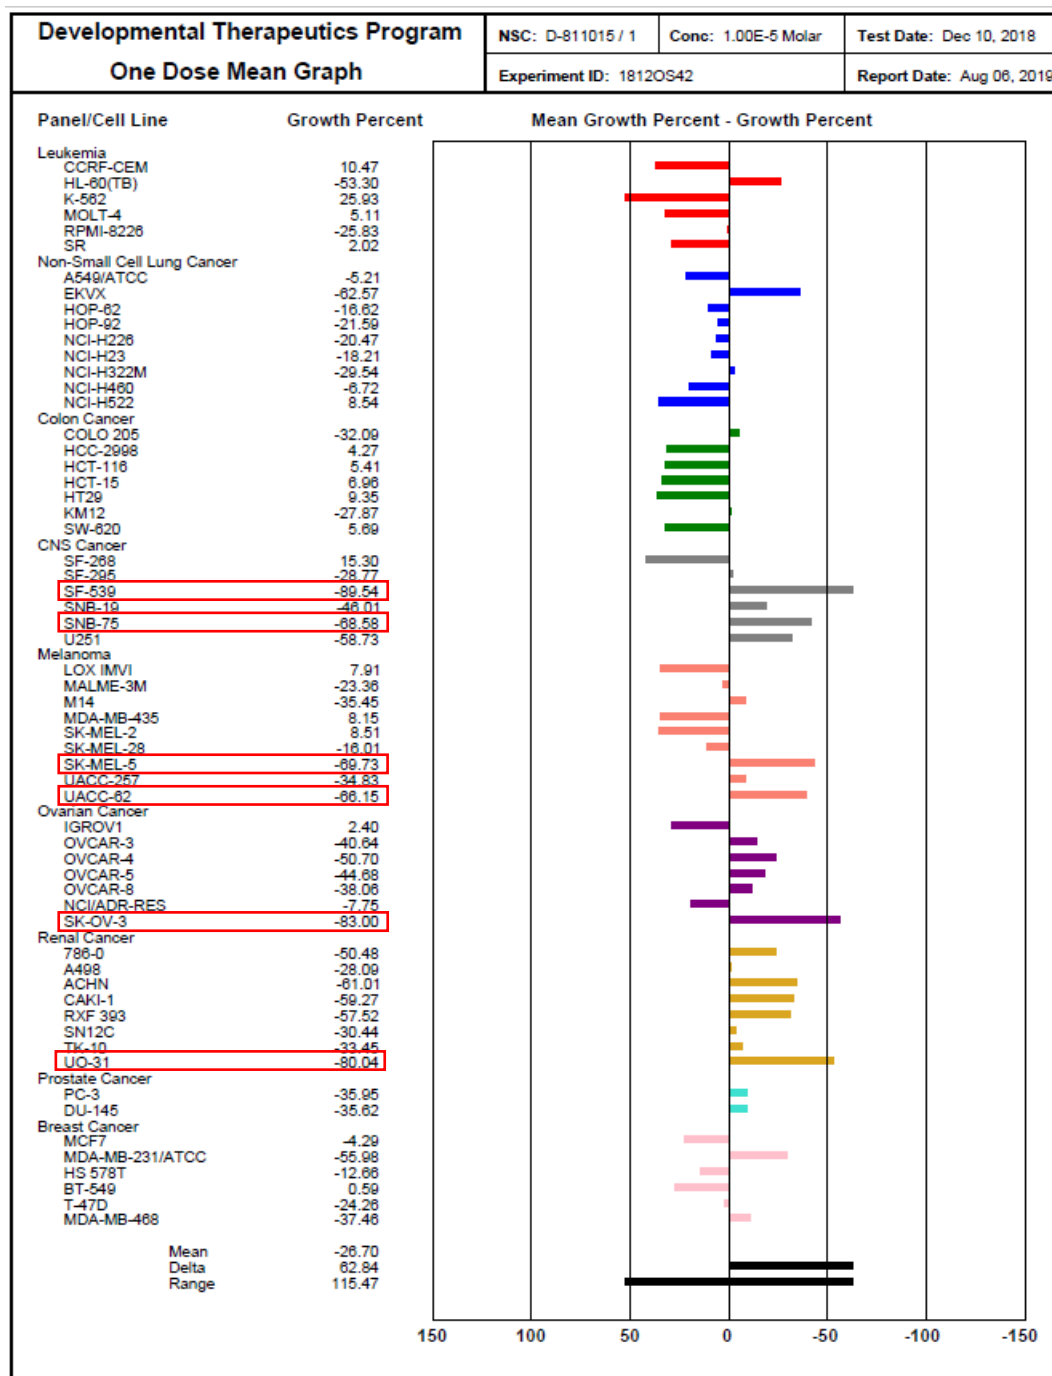

**Figure S3.** NCI-60 results of GI<sub>50</sub>, TGI, and LD<sub>50</sub> values for compound **14a**.

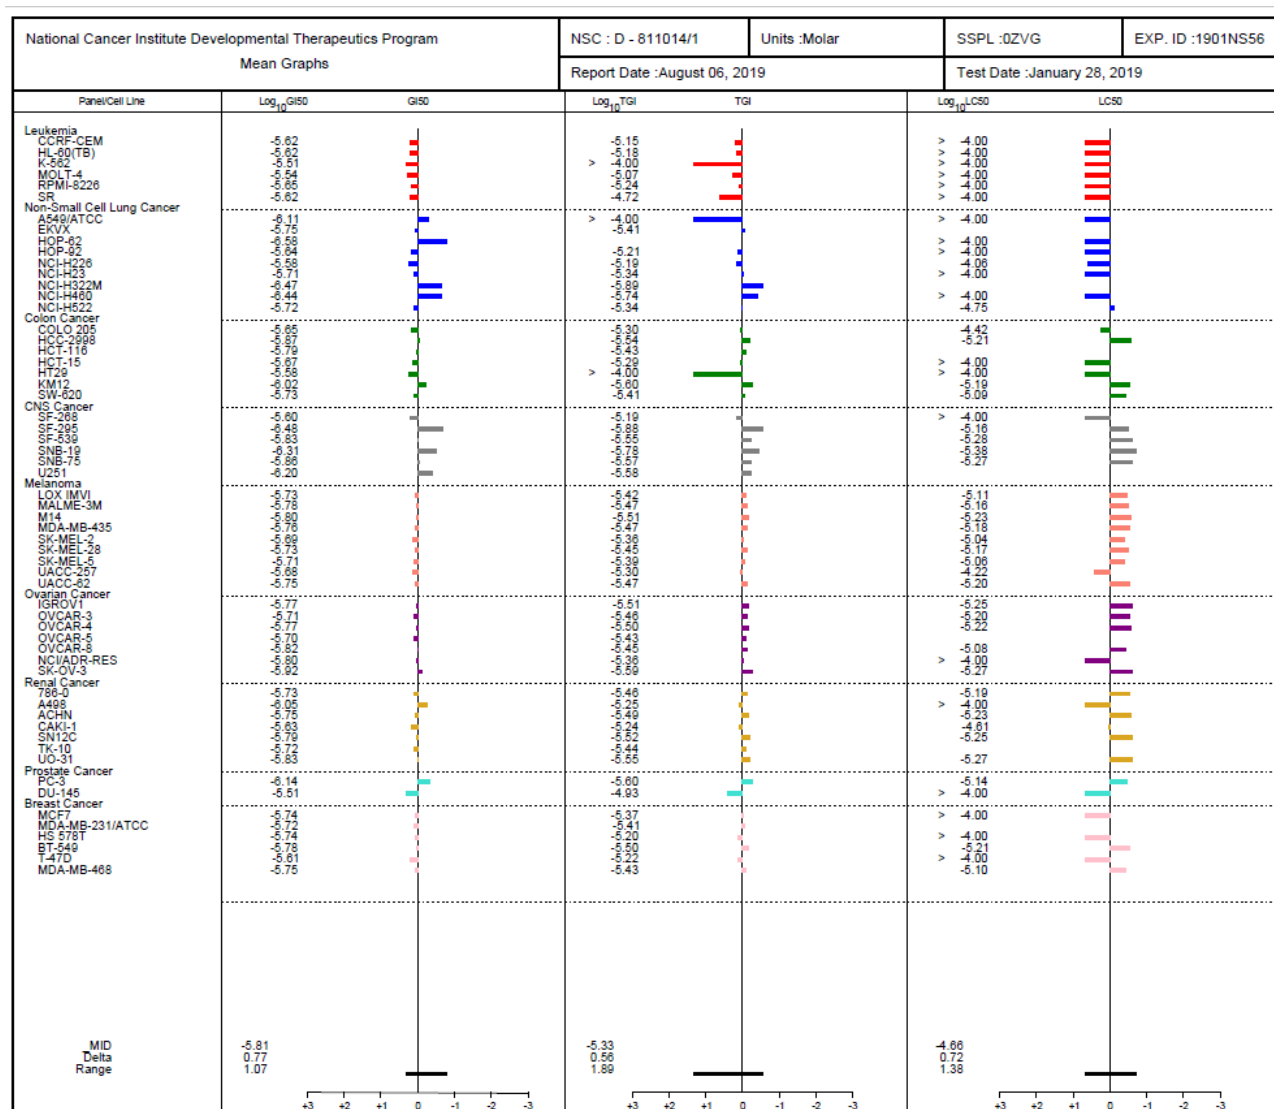

**Figure S4.** NCI-60 results of GI<sub>50</sub>, TGI, and LD<sub>50</sub> values for compound **17a**.

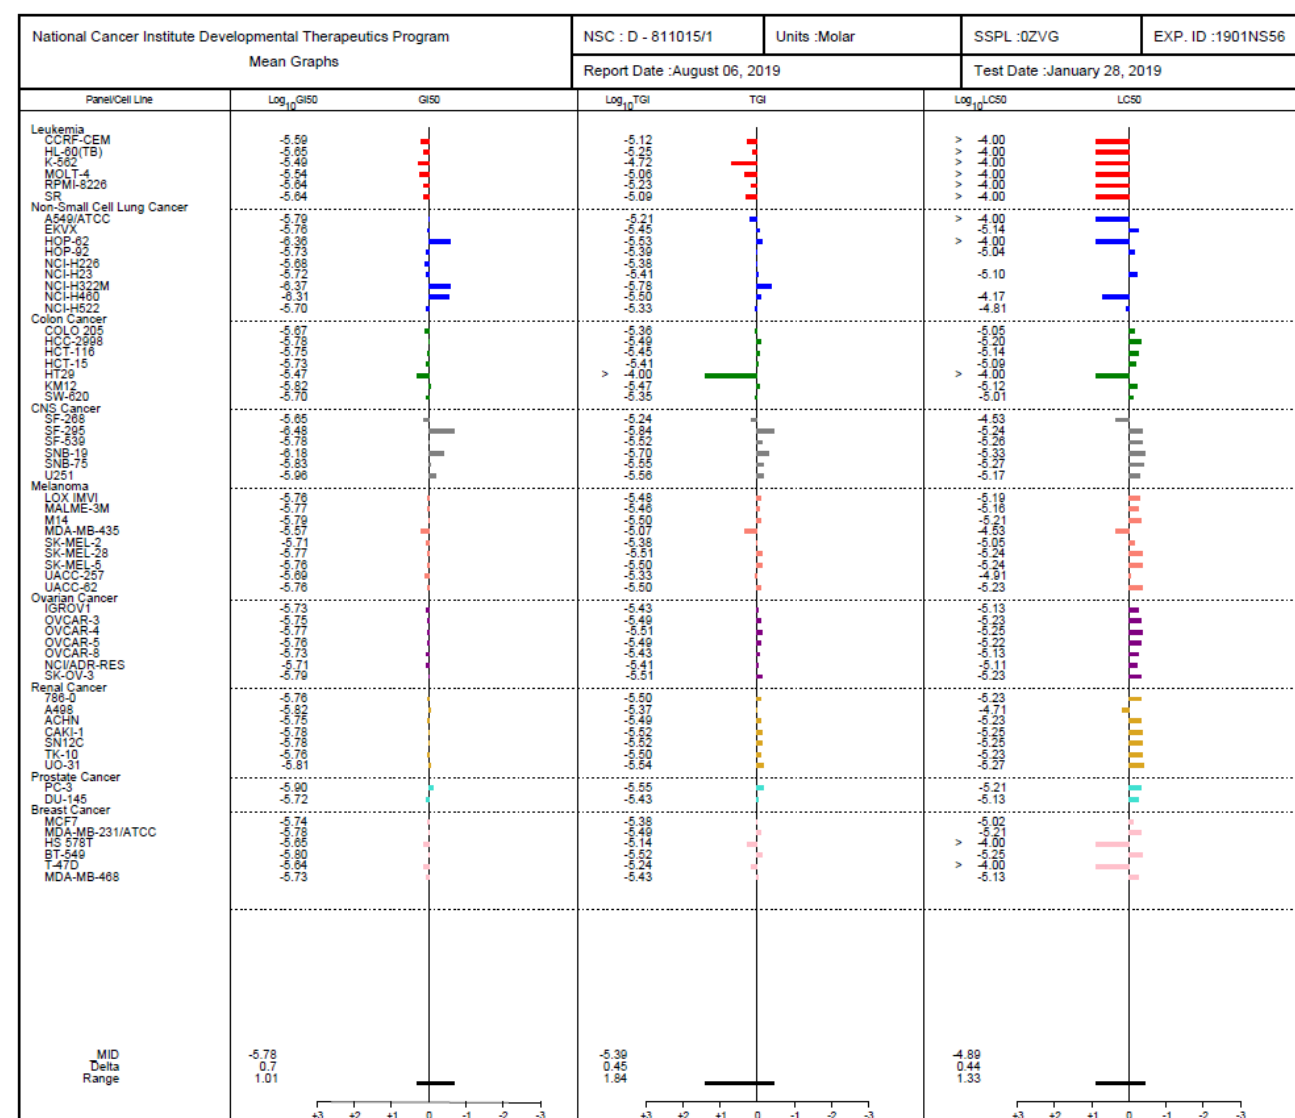

# **Spectroscopic characterization-NMR spectra**

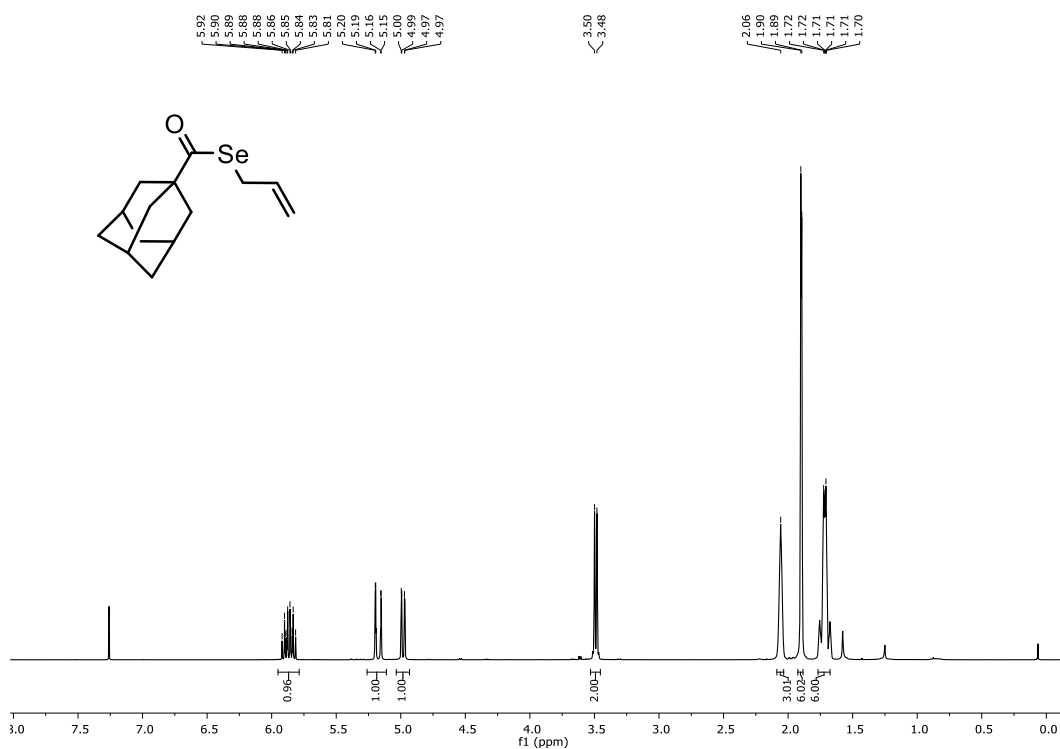

**Figure S5.** <sup>1</sup>H-NMR spectrum of compound **1a**.

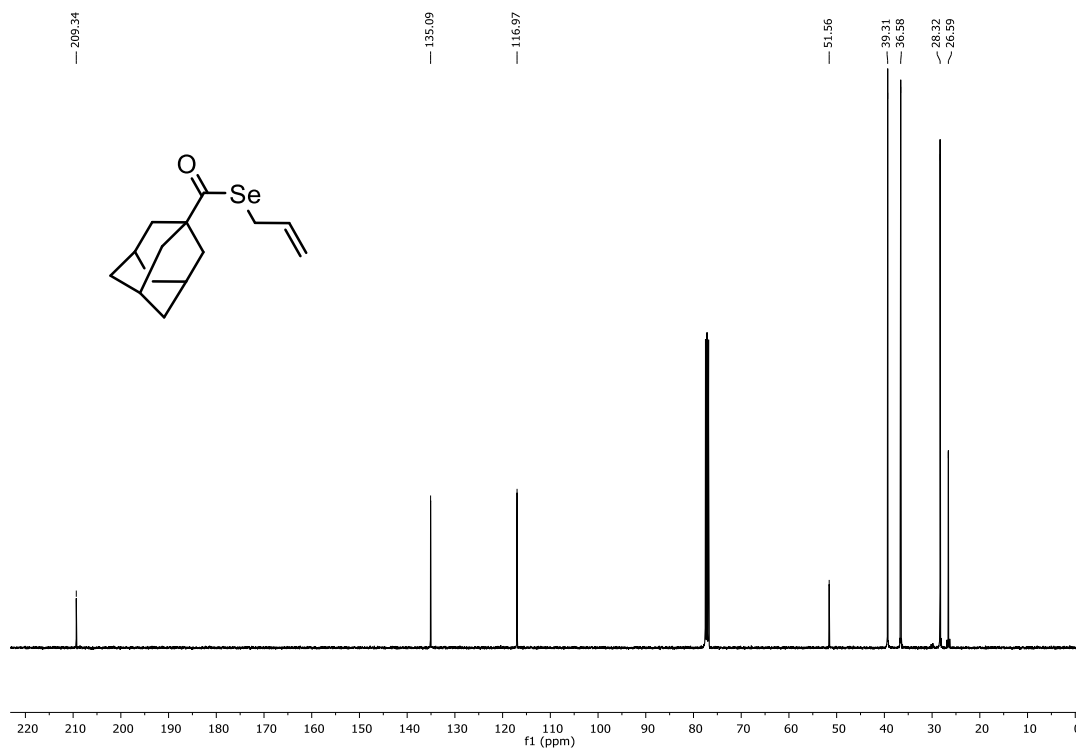

**Figure S6.** <sup>13</sup>C-NMR spectrum of compound **1a**.

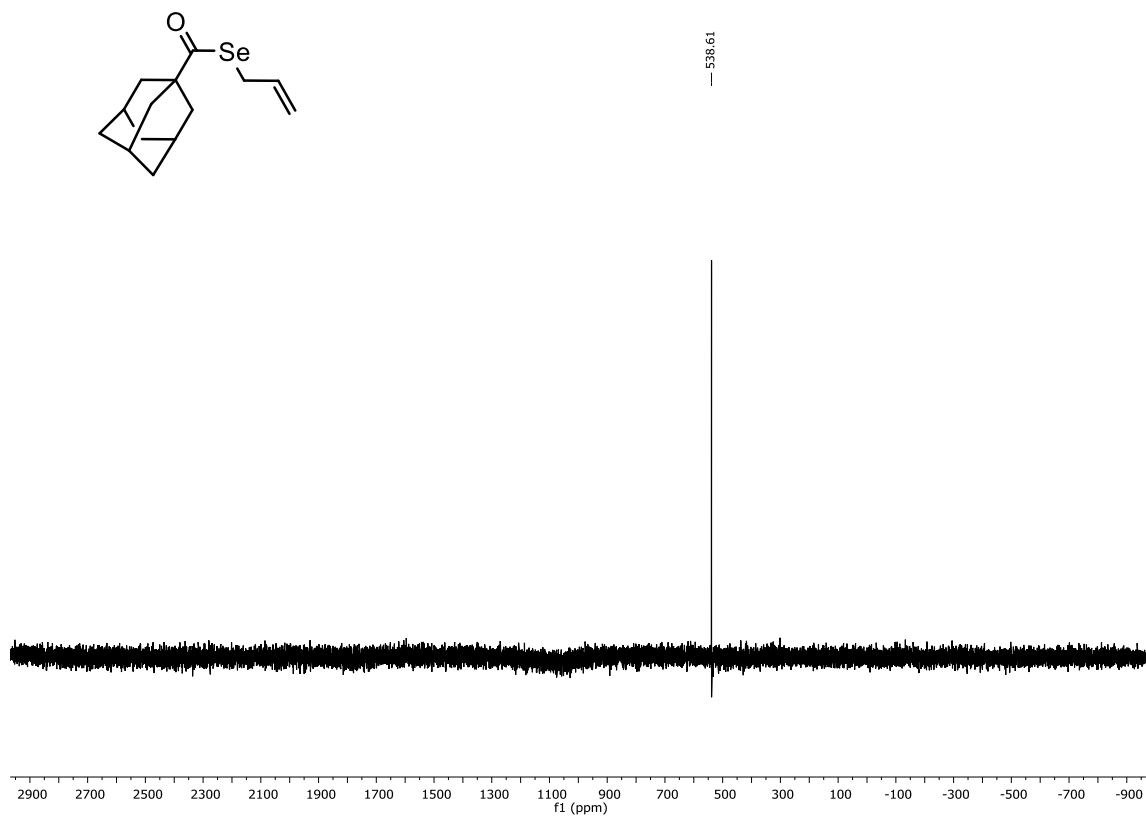

**Figure S7.**  $^{77}\text{Se}$ -NMR spectrum of compound **1a**.

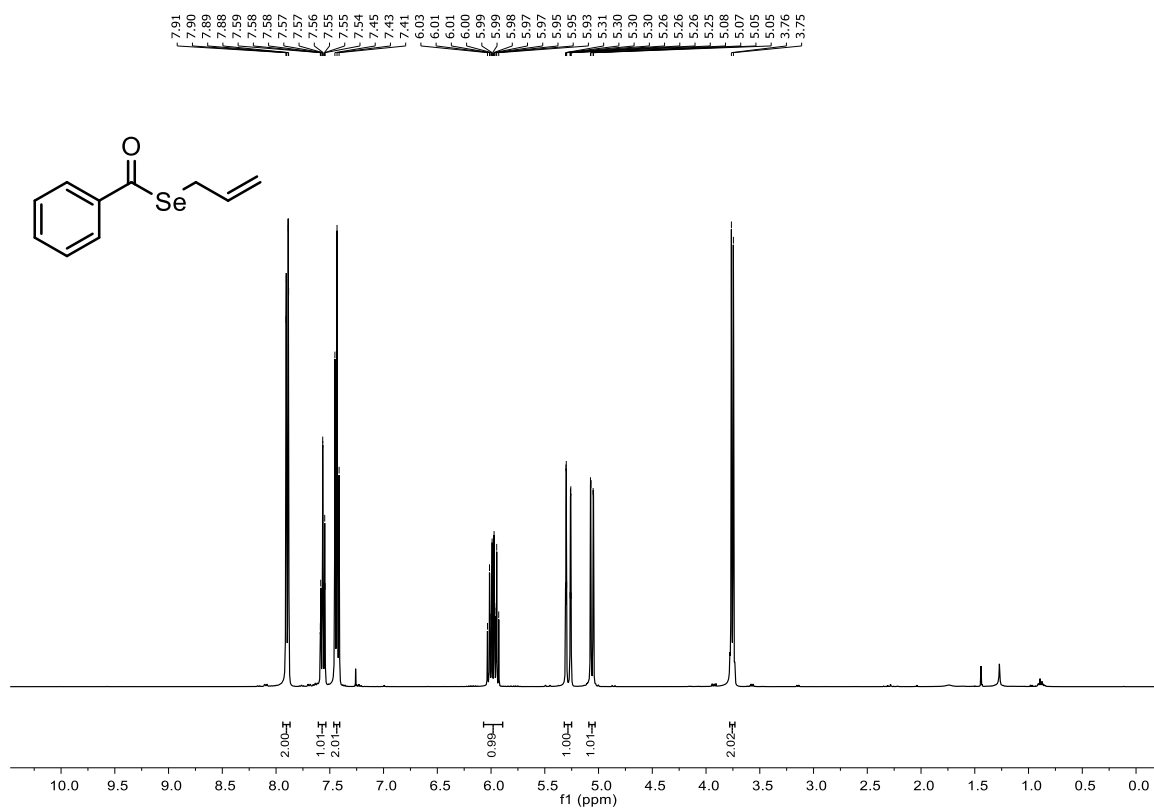

**Figure S8.**  $^1\text{H}$ -NMR spectrum of compound **2a**.

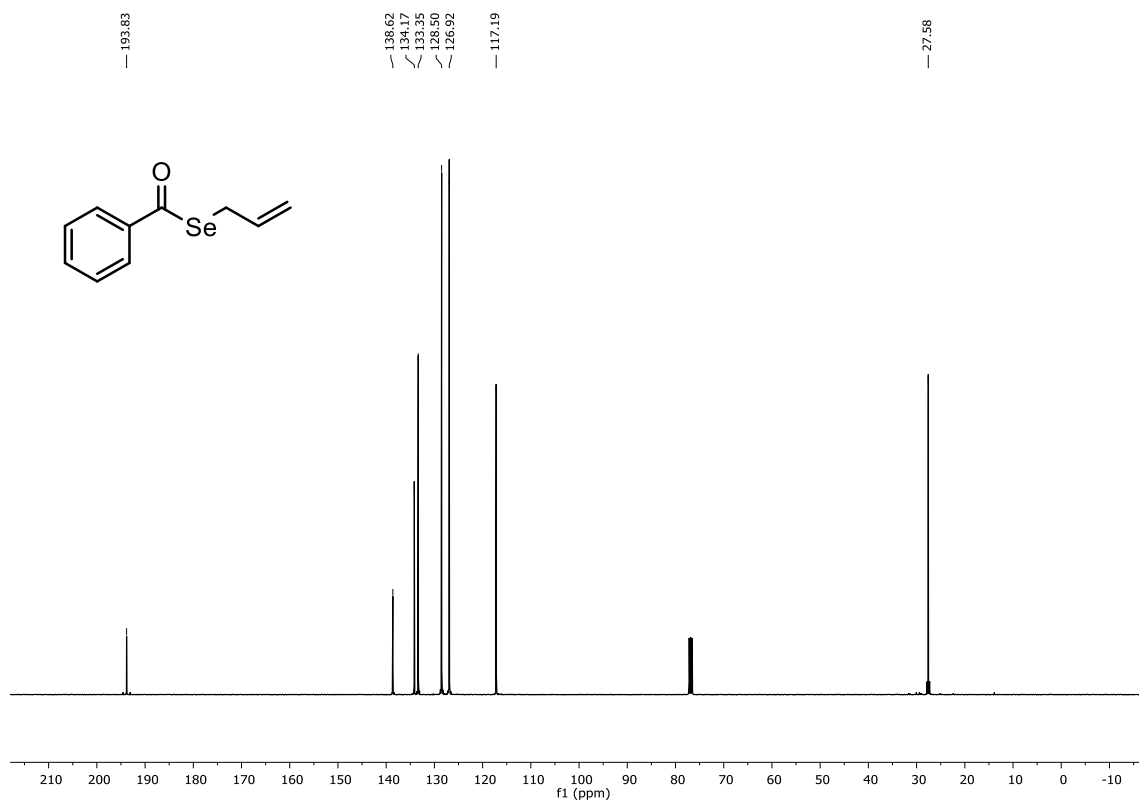

Figure S9. <sup>13</sup>C-NMR spectrum of compound 2a.

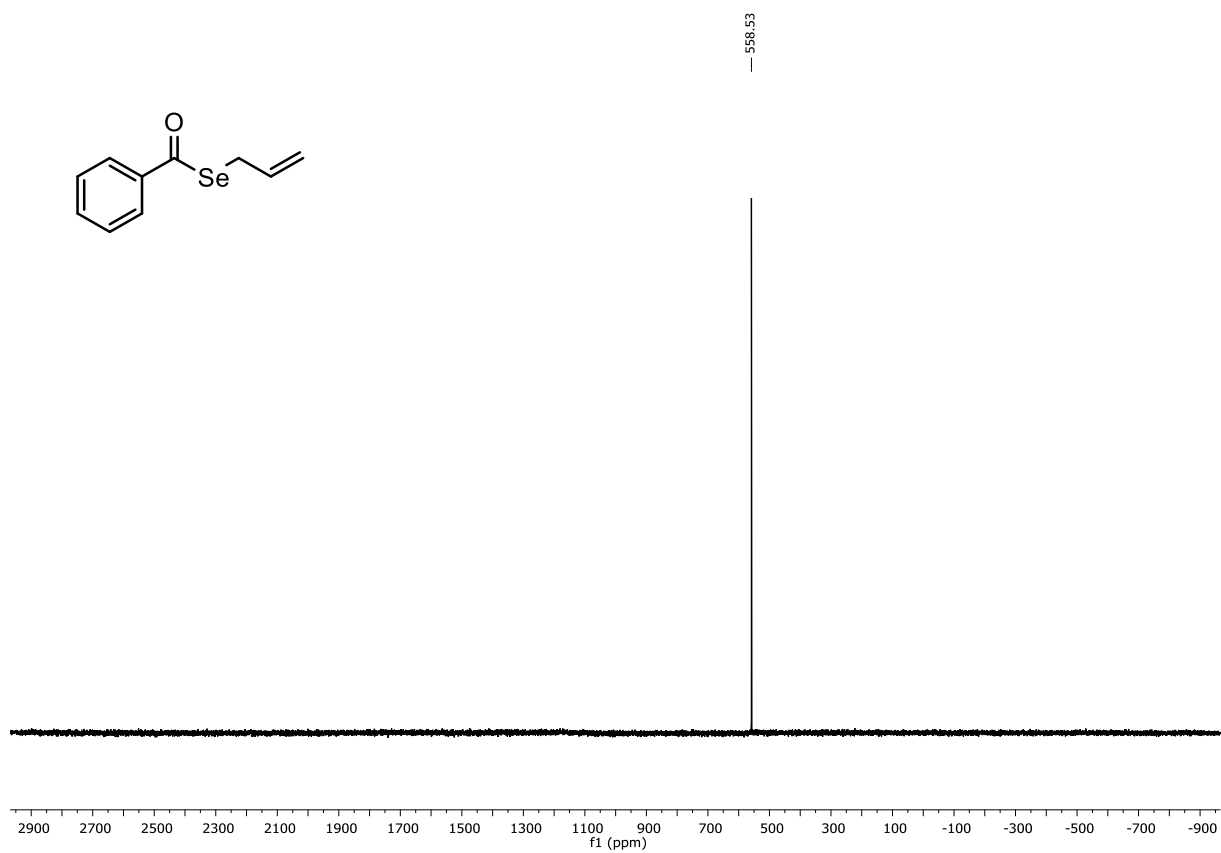

Figure S10. <sup>77</sup>Se-NMR spectrum of compound 2a.

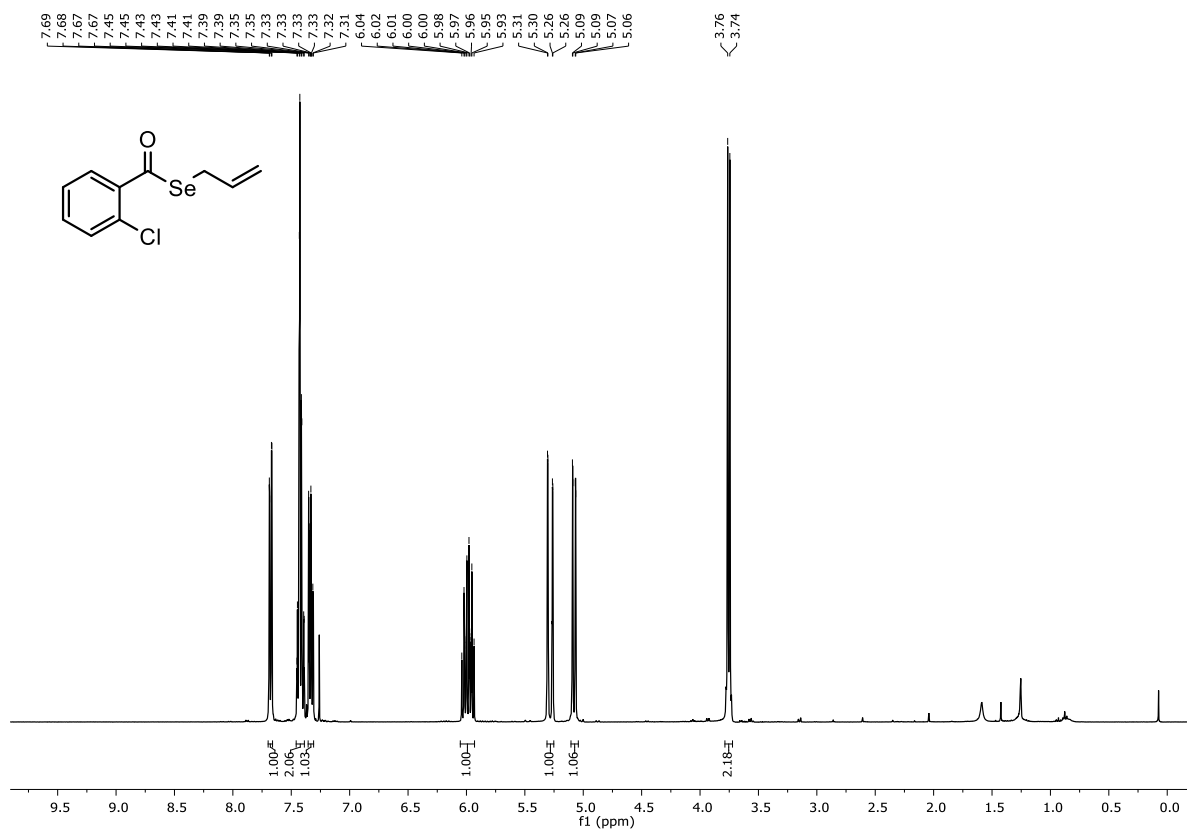

Figure S11. <sup>1</sup>H-NMR spectrum of compound 3a.

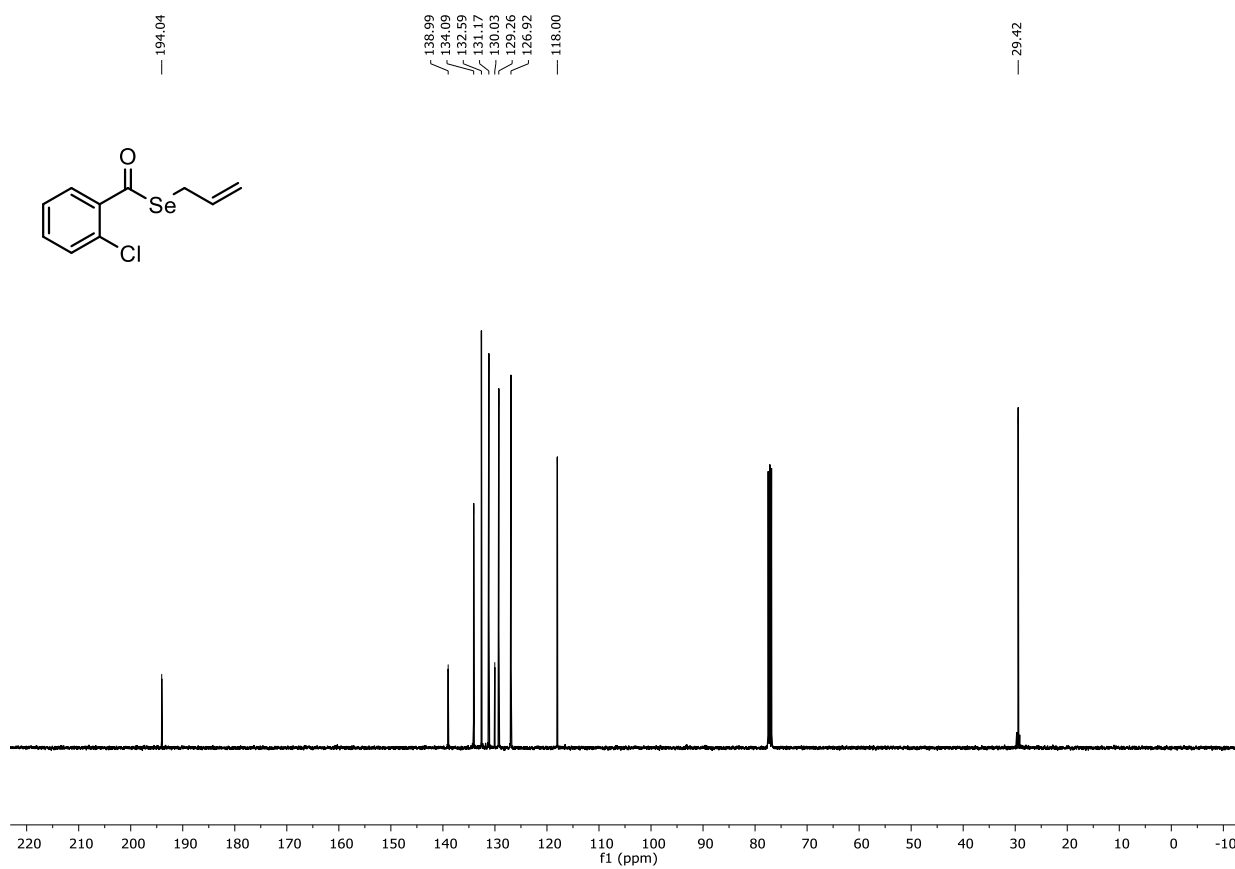

Figure S12. <sup>13</sup>C-NMR spectrum of compound 3a.

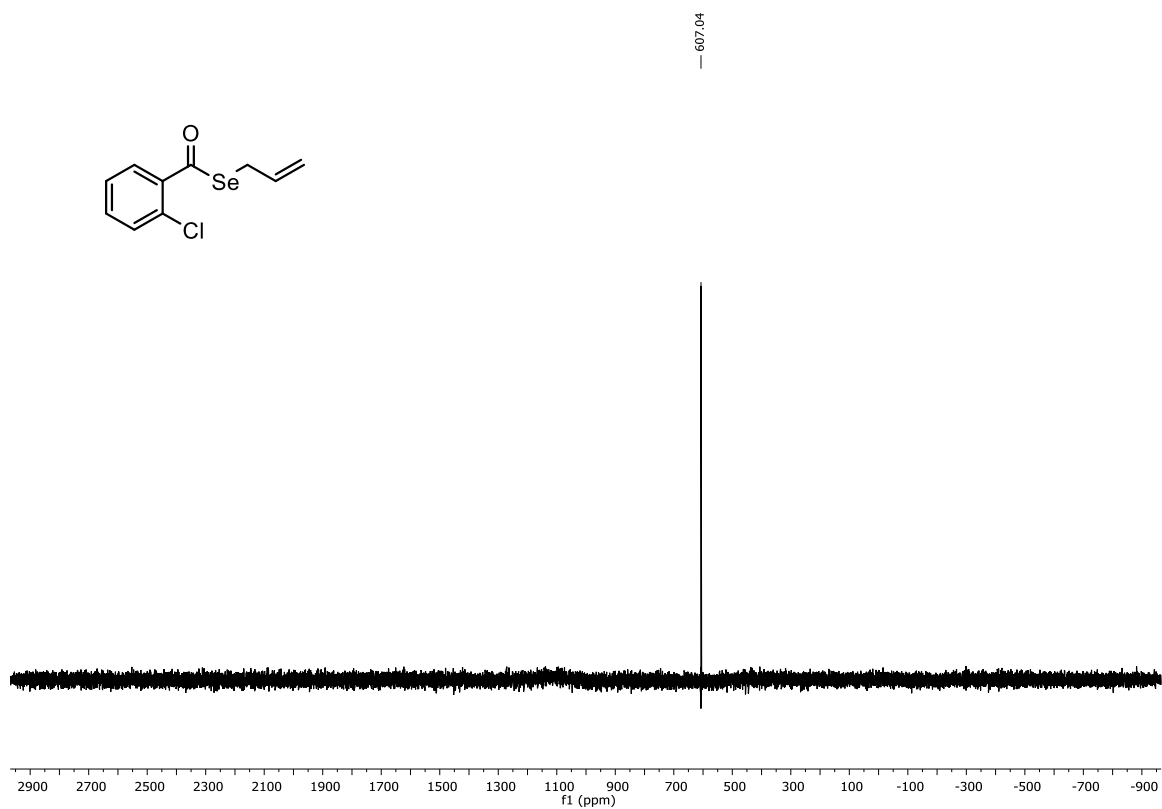

Figure S13.  $^{77}\text{Se}$ -NMR spectrum of compound **3a**.

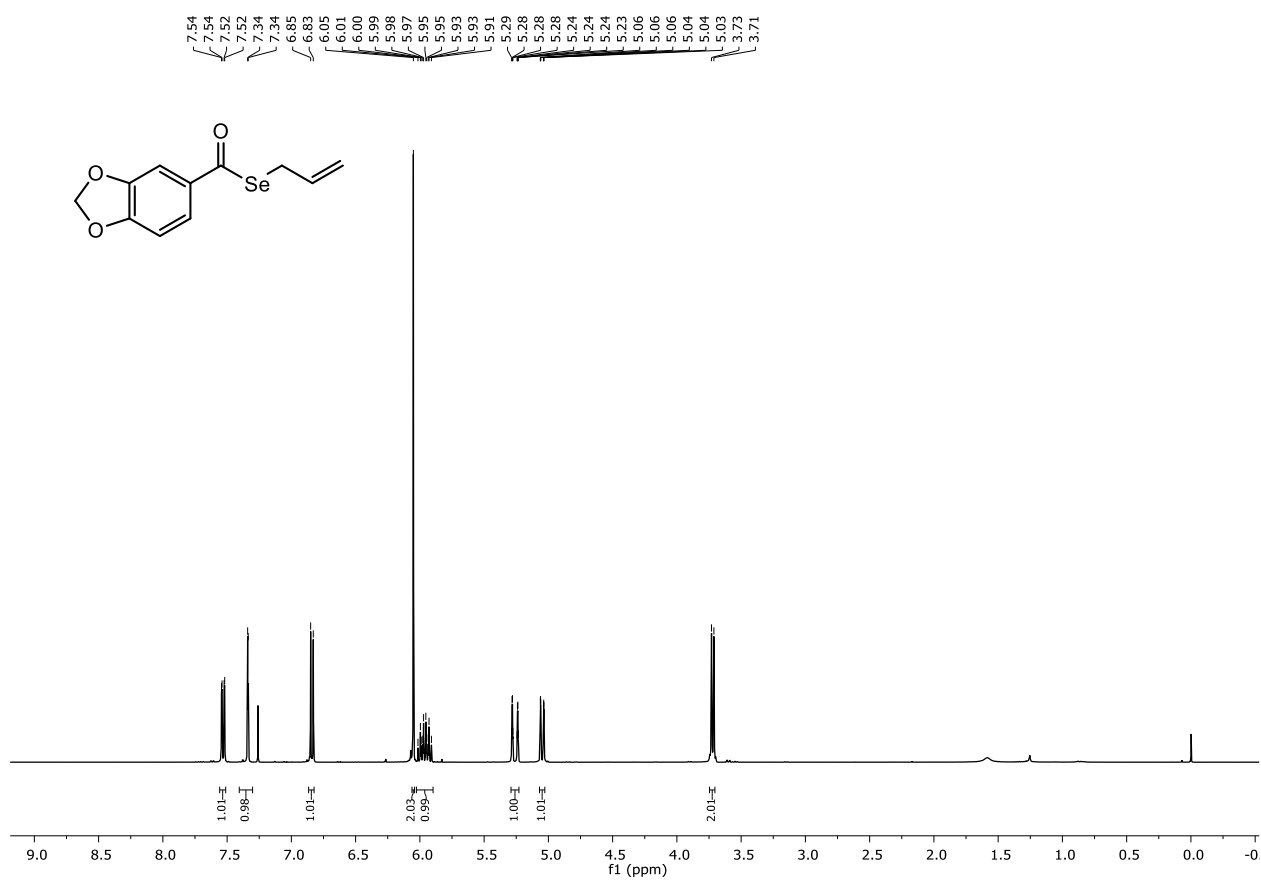

Figure S14.  $^1\text{H}$ -NMR spectrum of compound **4a**.



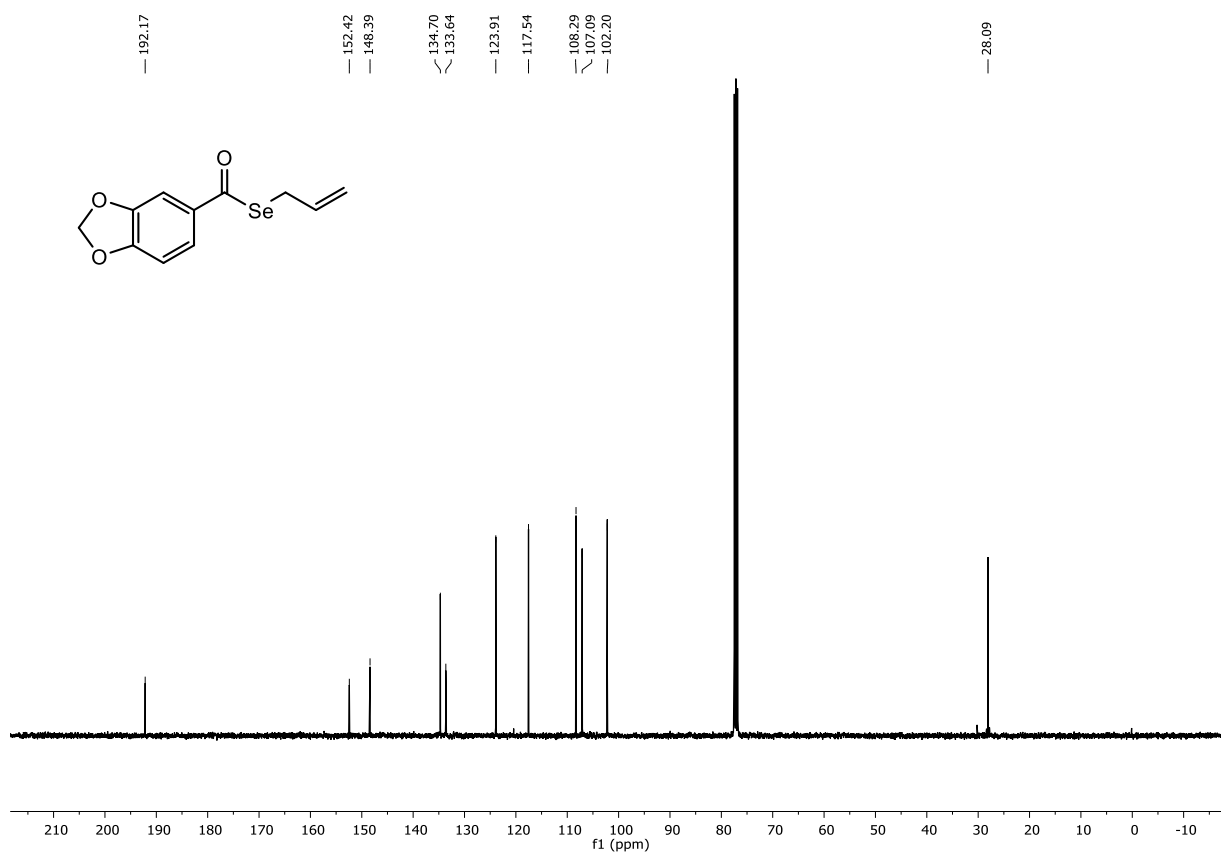

**Figure S15.**  $^{13}\text{C}$ -NMR spectrum of compound **4a**.

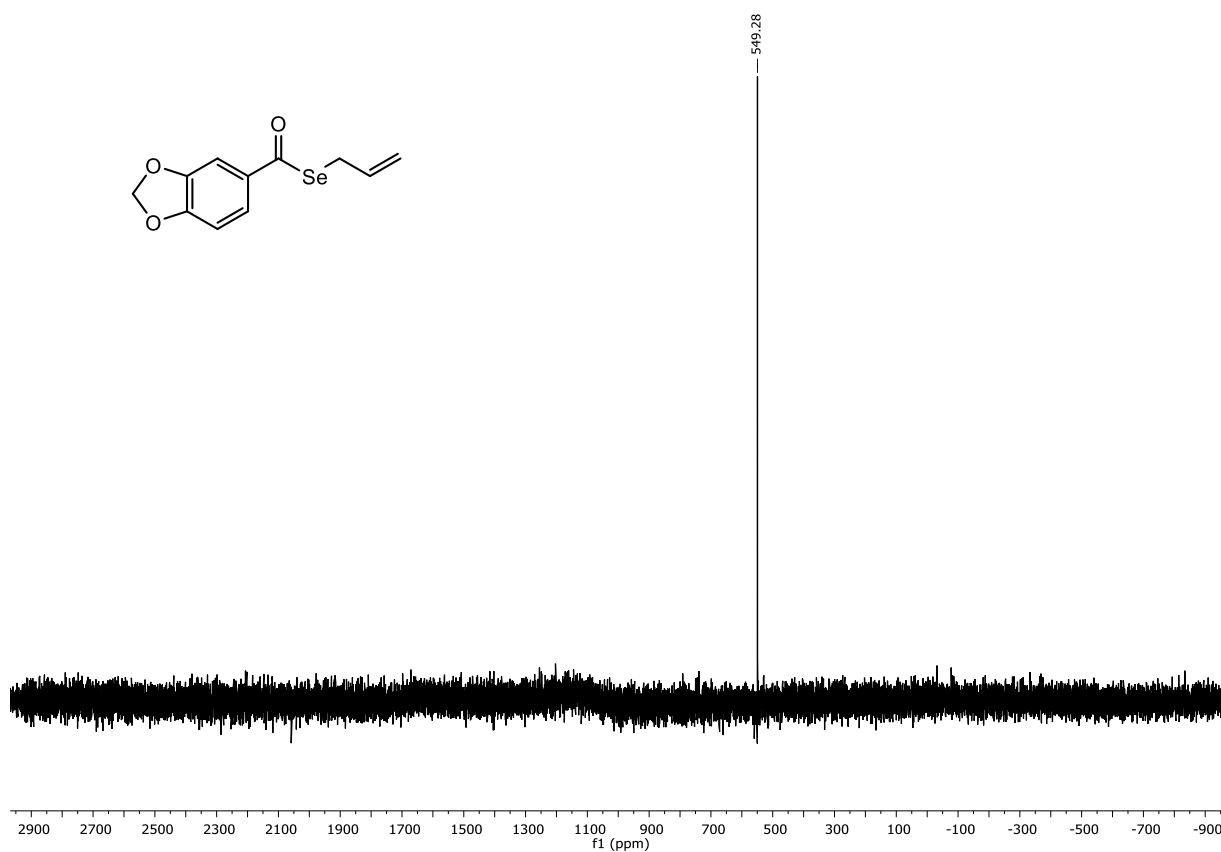

**Figure S16.**  $^{77}\text{Se}$ -NMR spectrum of compound **4a**.

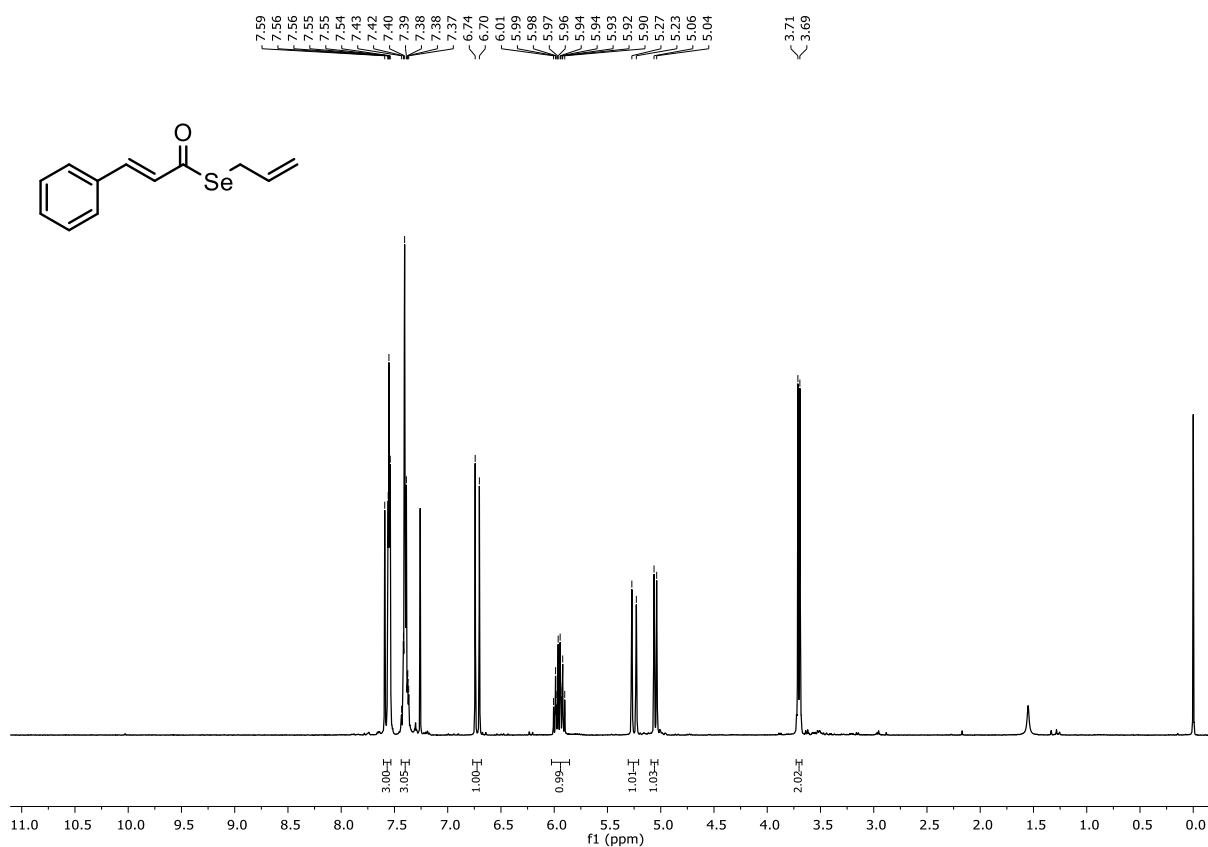

**Figure S17.** <sup>1</sup>H-NMR spectrum of compound **5a**.

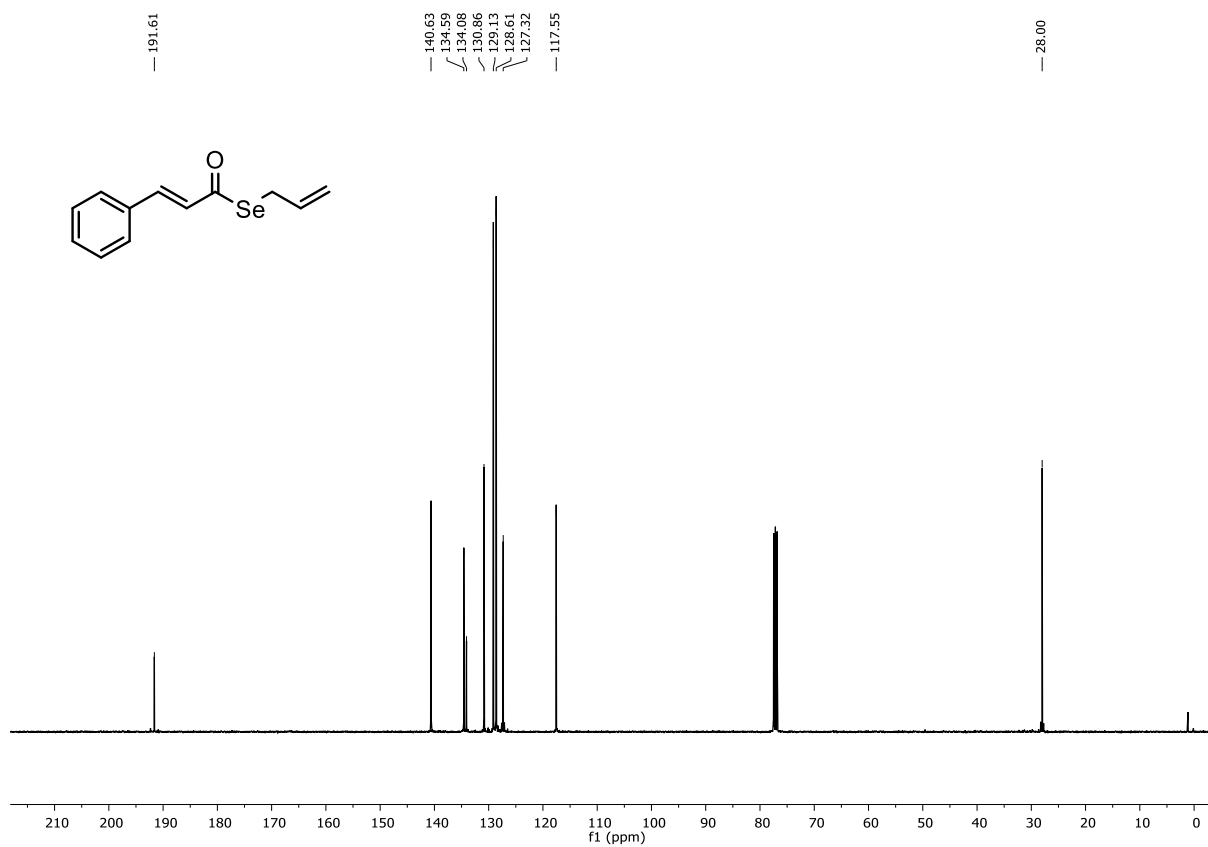

**Figure S18.** <sup>13</sup>C-NMR spectrum of compound **5a**.

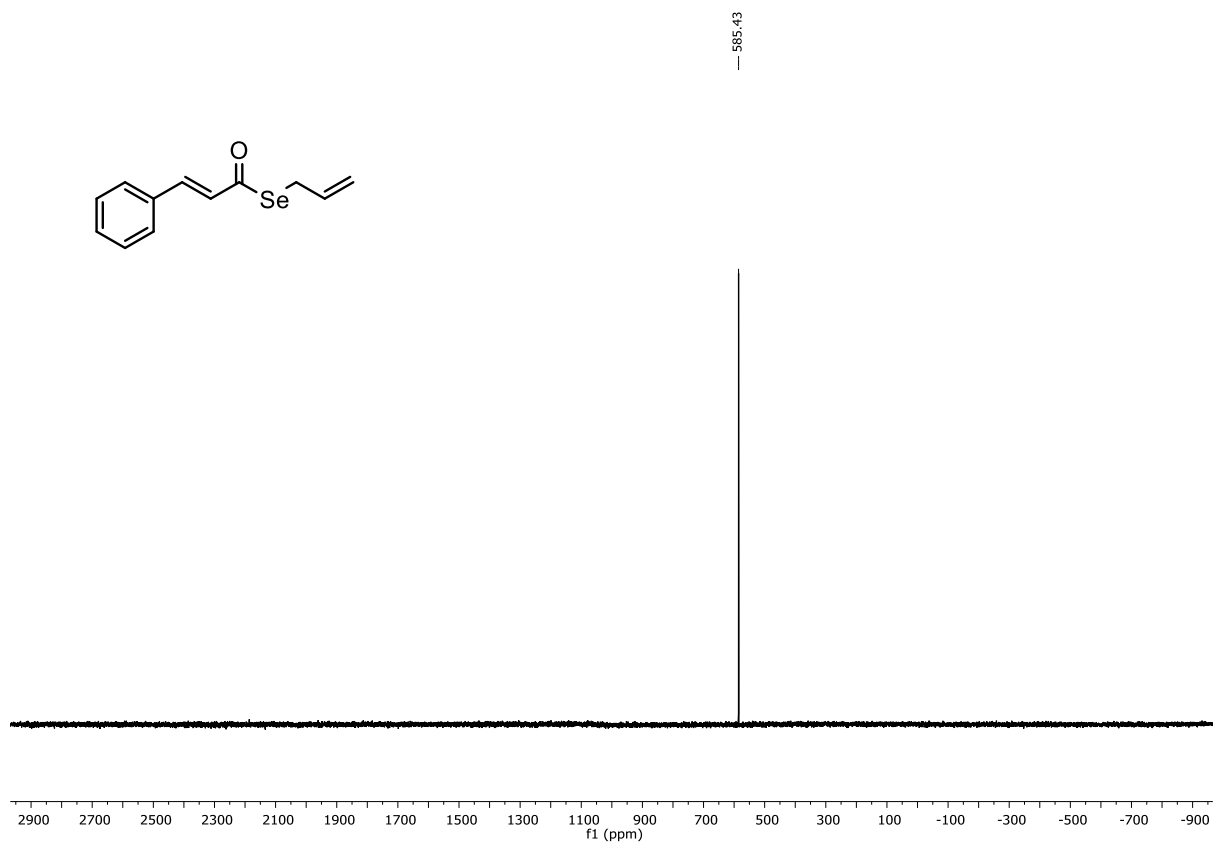

Figure S19.  $^{77}\text{Se}$ -NMR spectrum of compound 5a.

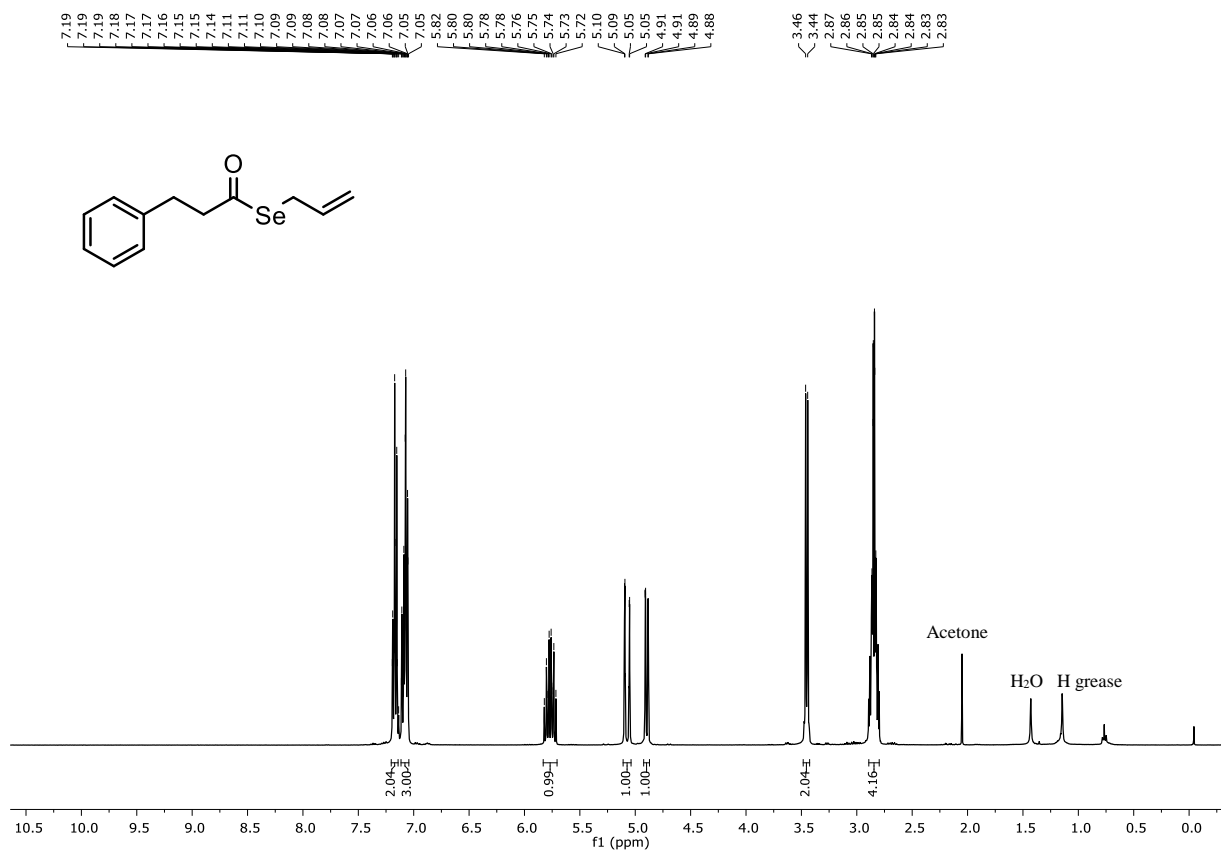

Figure S20.  $^1\text{H}$ -NMR spectrum of compound 6a.

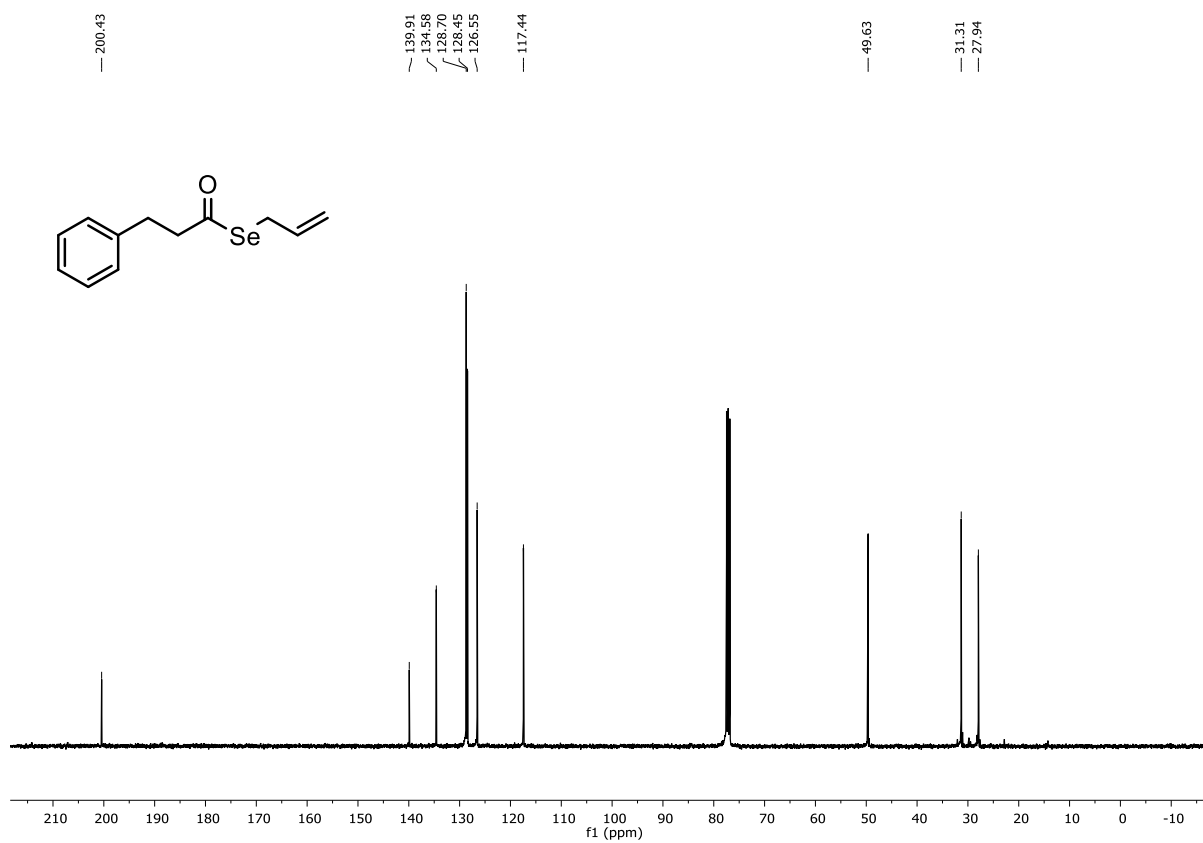

**Figure S21.**  $^{13}\text{C}$ -NMR spectrum of compound **6a**.

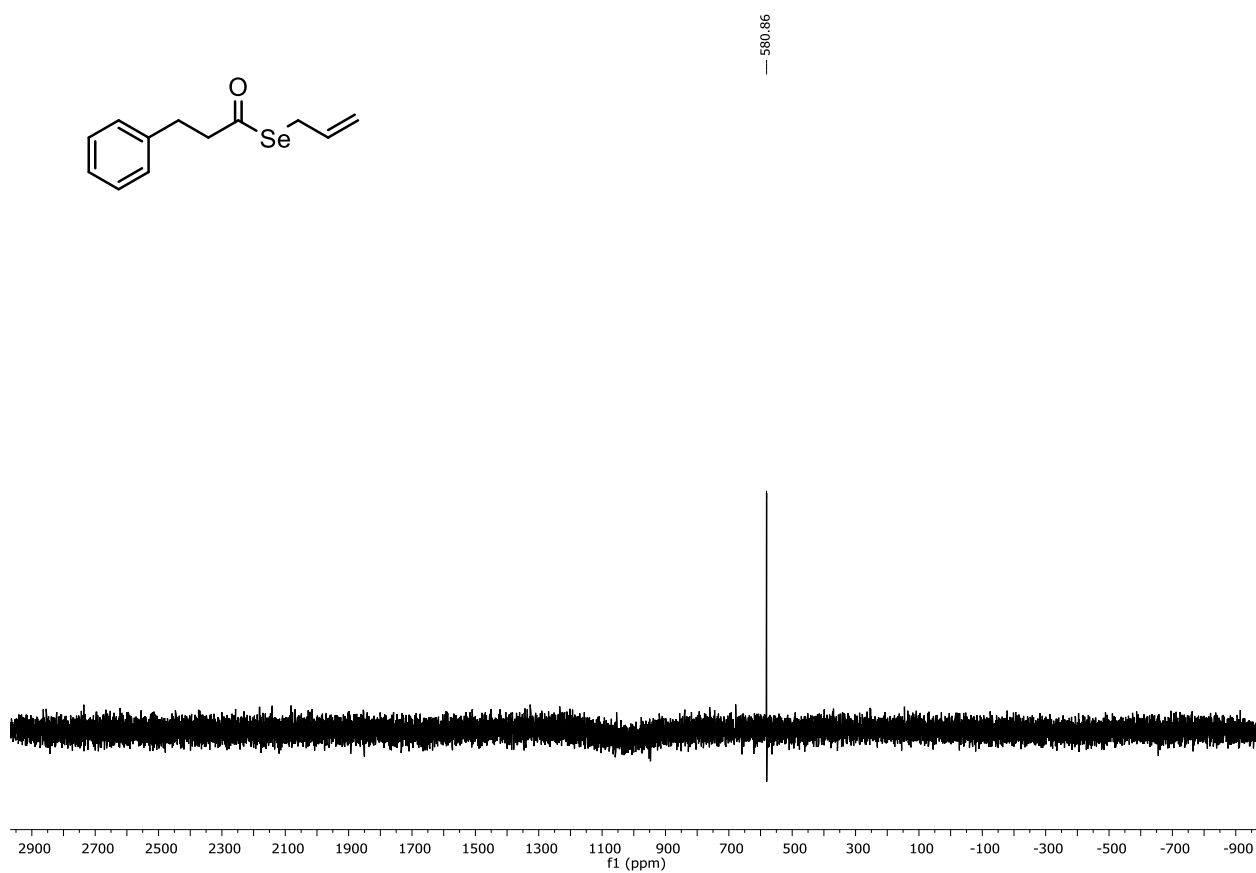

**Figure S22.**  $^{77}\text{Se}$ -NMR spectrum of compound **6a**.

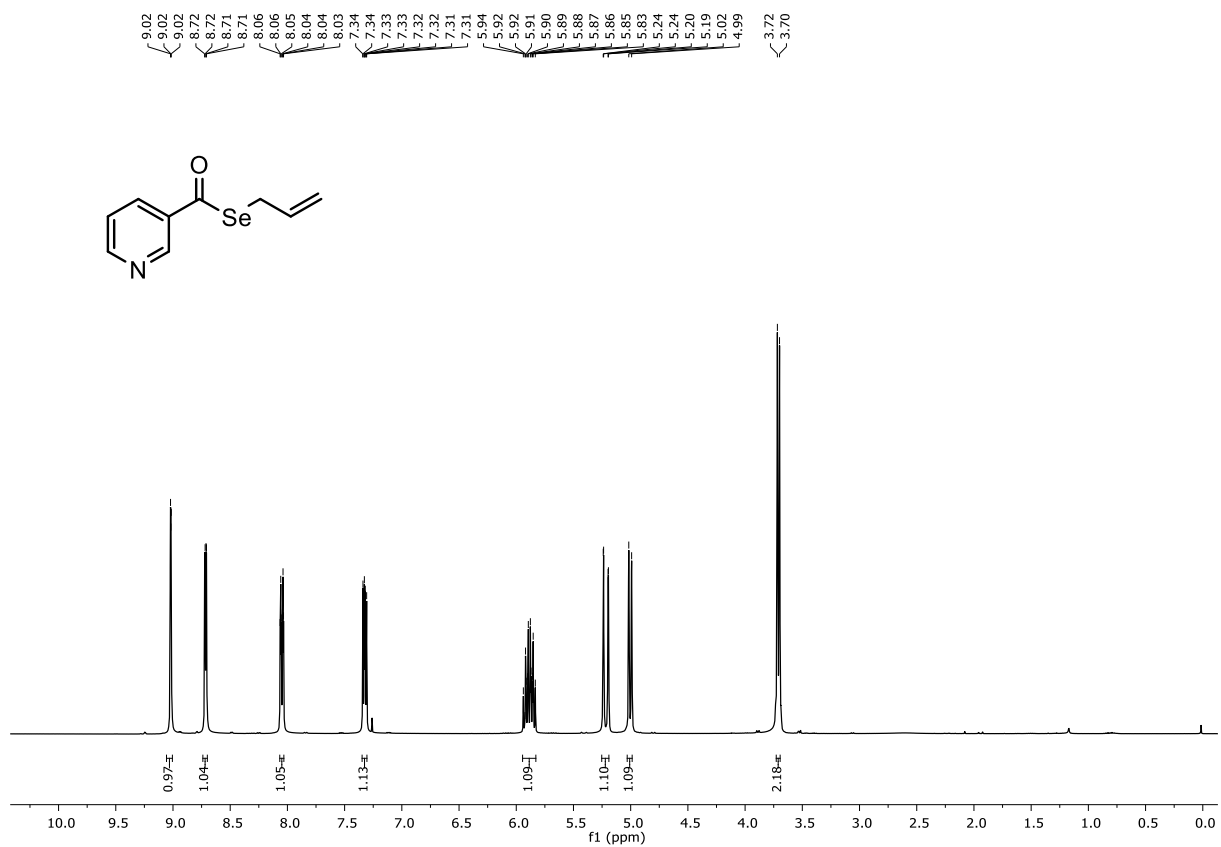

**Figure S23.** <sup>1</sup>H-NMR spectrum of compound **7a**.

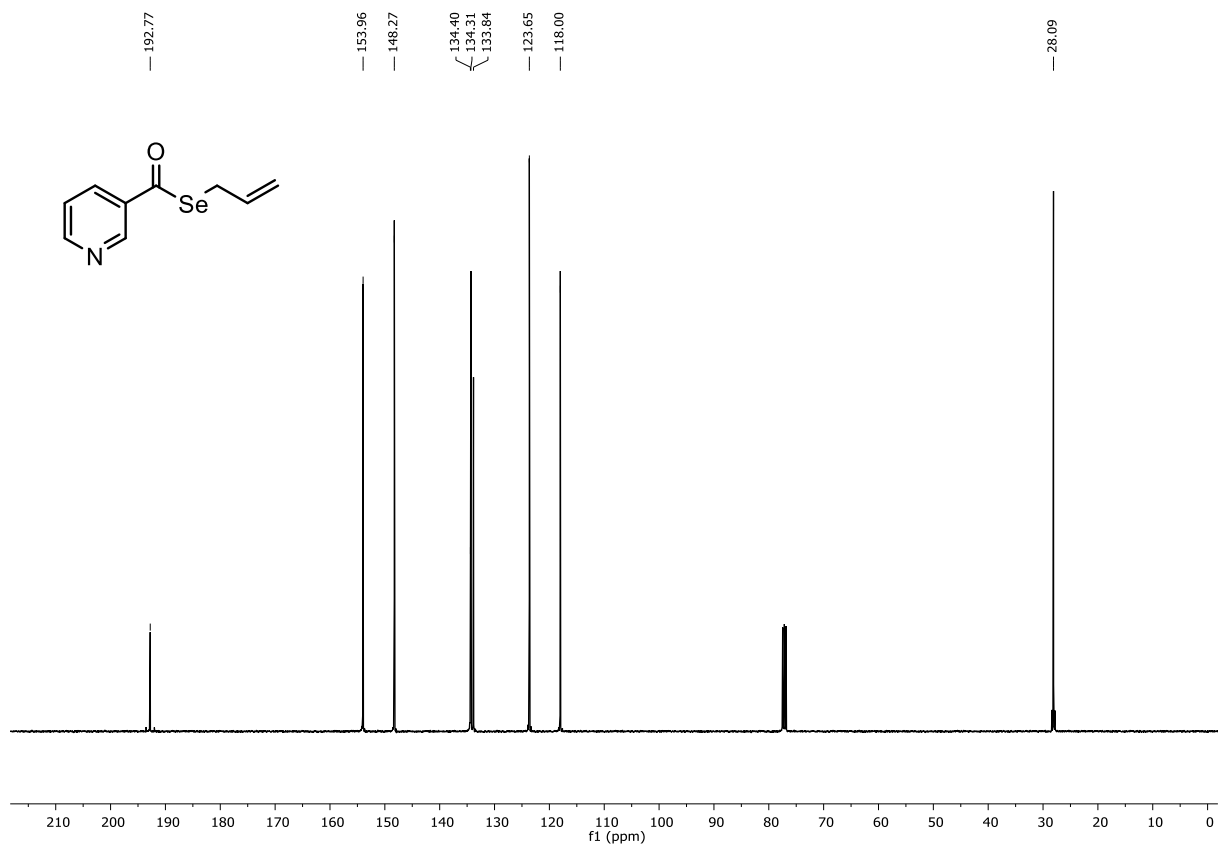

**Figure S24.** <sup>13</sup>C-NMR spectrum of compound **7a**.

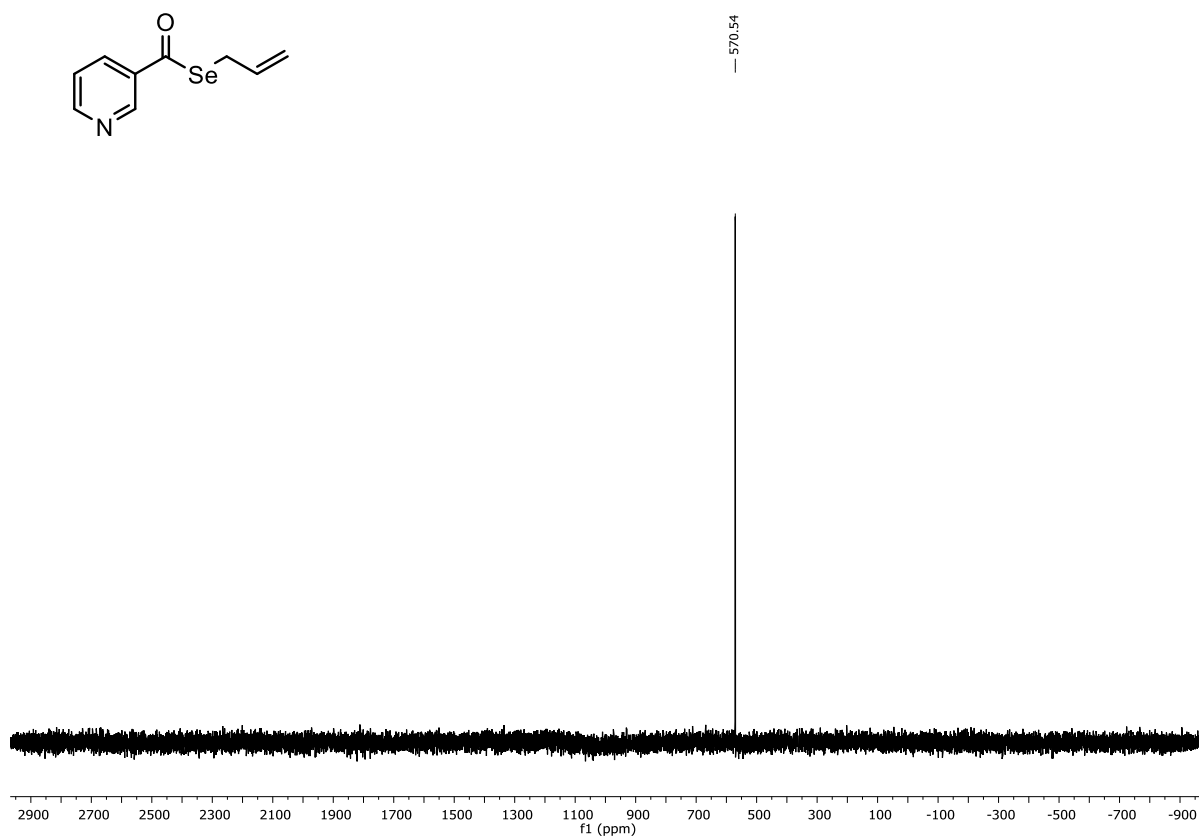

Figure S25. <sup>77</sup>Se-NMR spectrum of compound 7a.

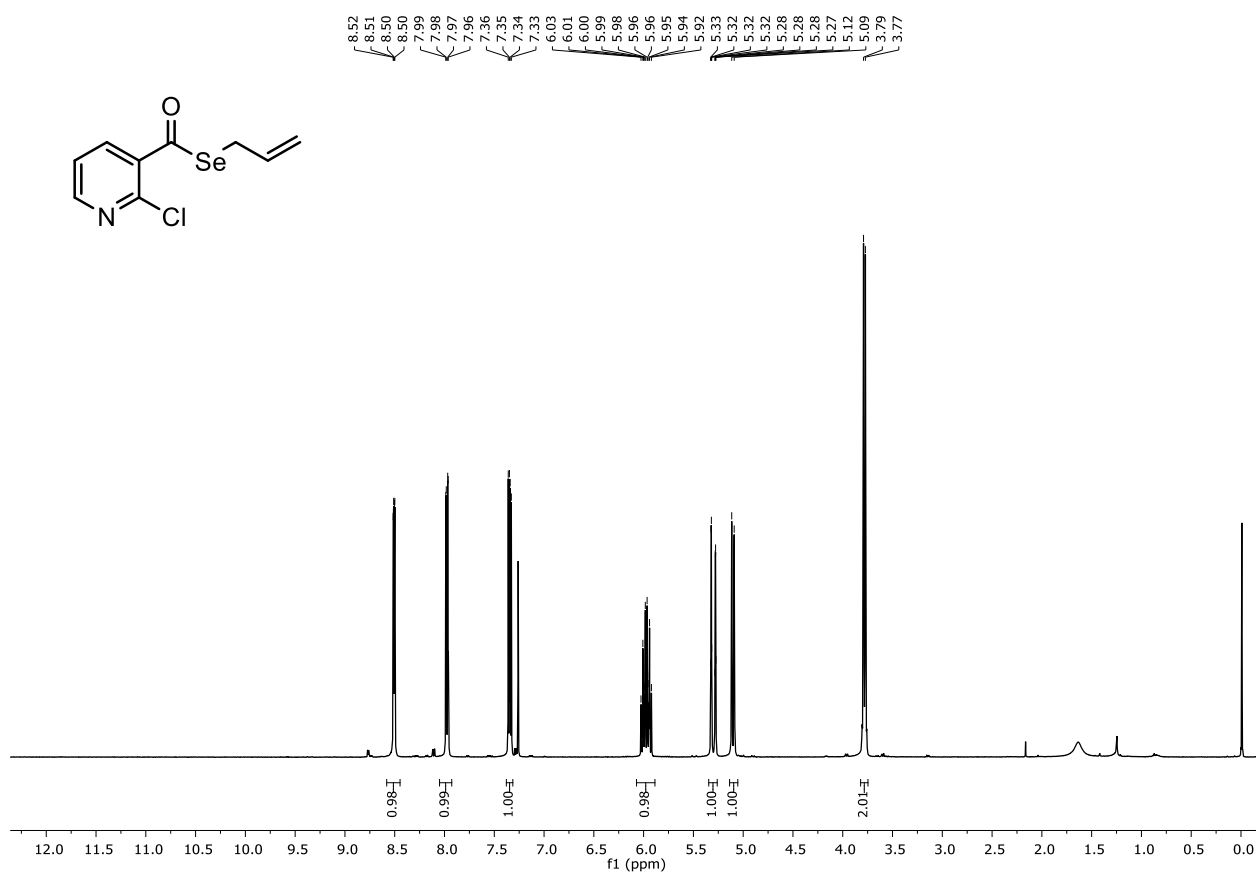

Figure S26. <sup>1</sup>H-NMR spectrum of compound 8a.

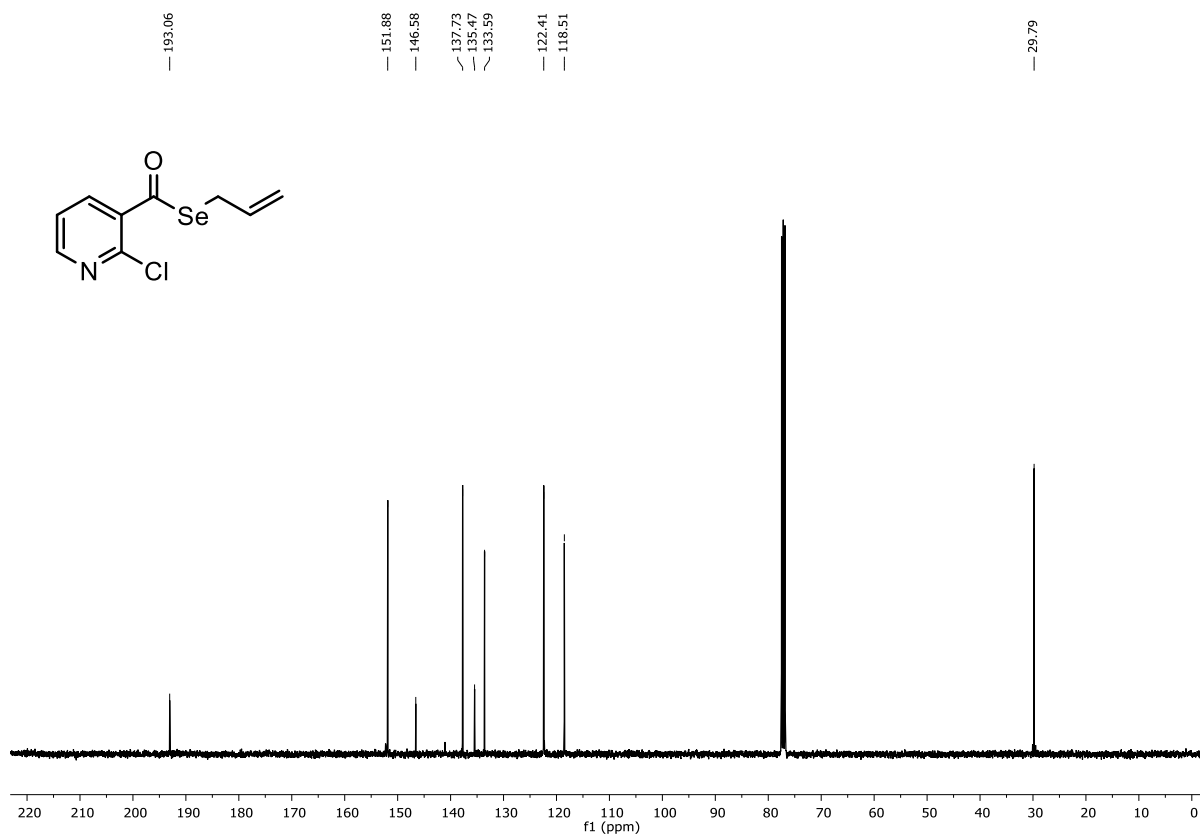

**Figure S27.**  $^{13}\text{C}$ -NMR spectrum of compound **8a**.

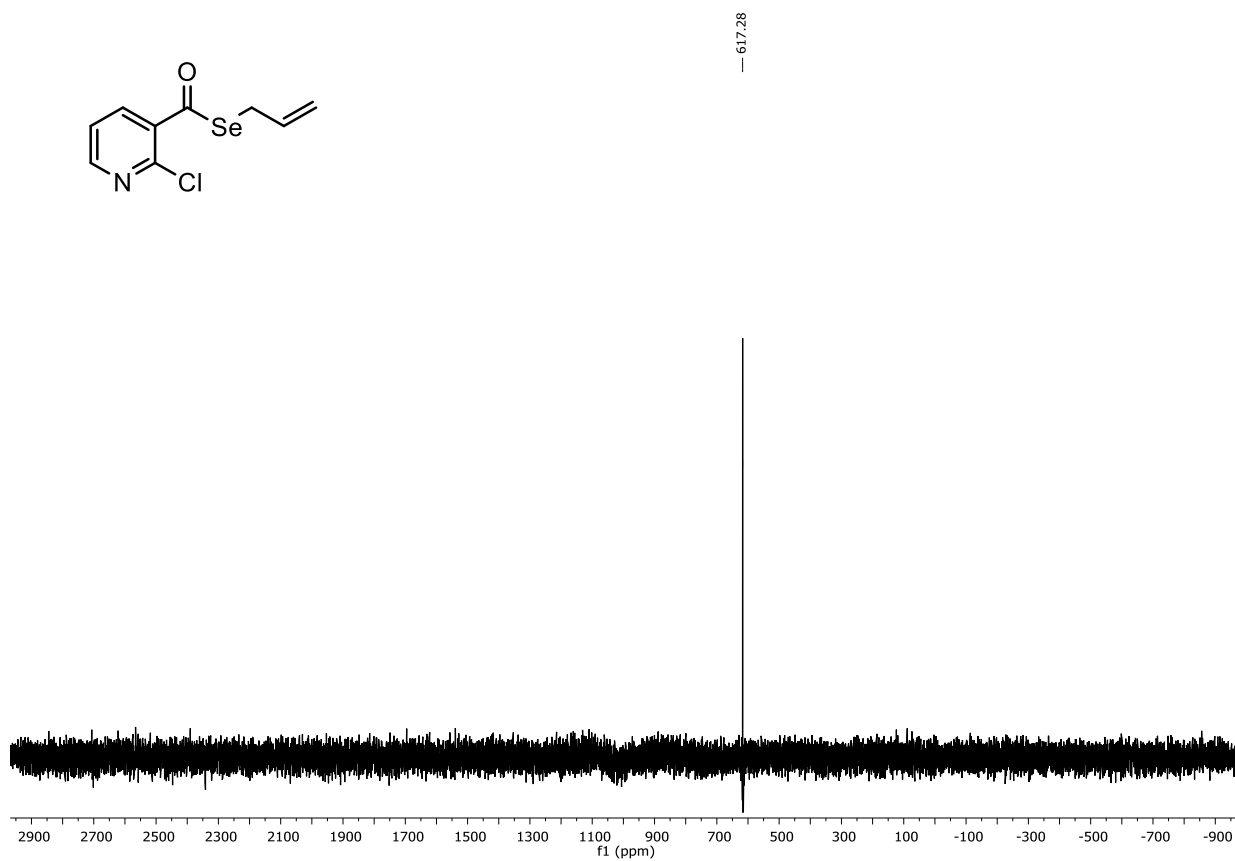

**Figure S28.**  $^{77}\text{Se}$ -NMR spectrum of compound **8a**.

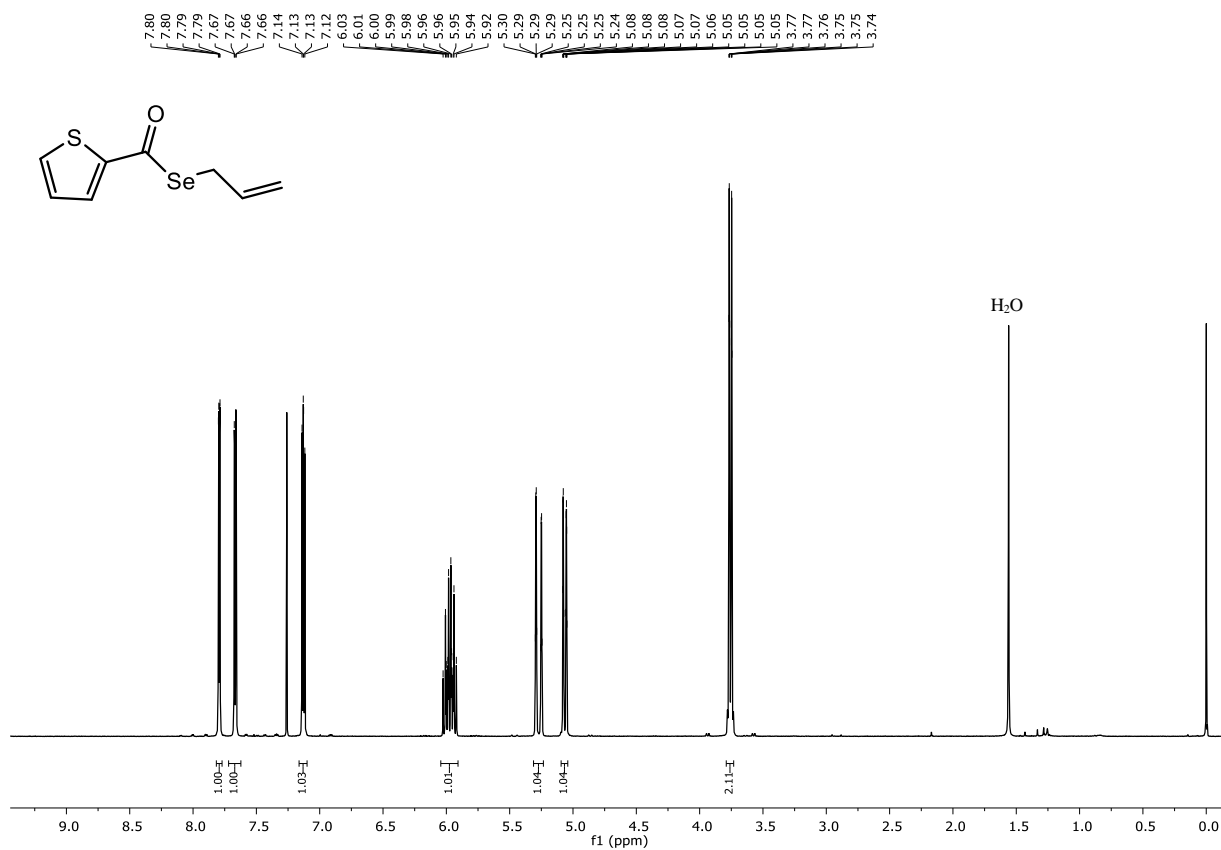

**Figure S29.** <sup>1</sup>H-NMR spectrum of compound **9a**.

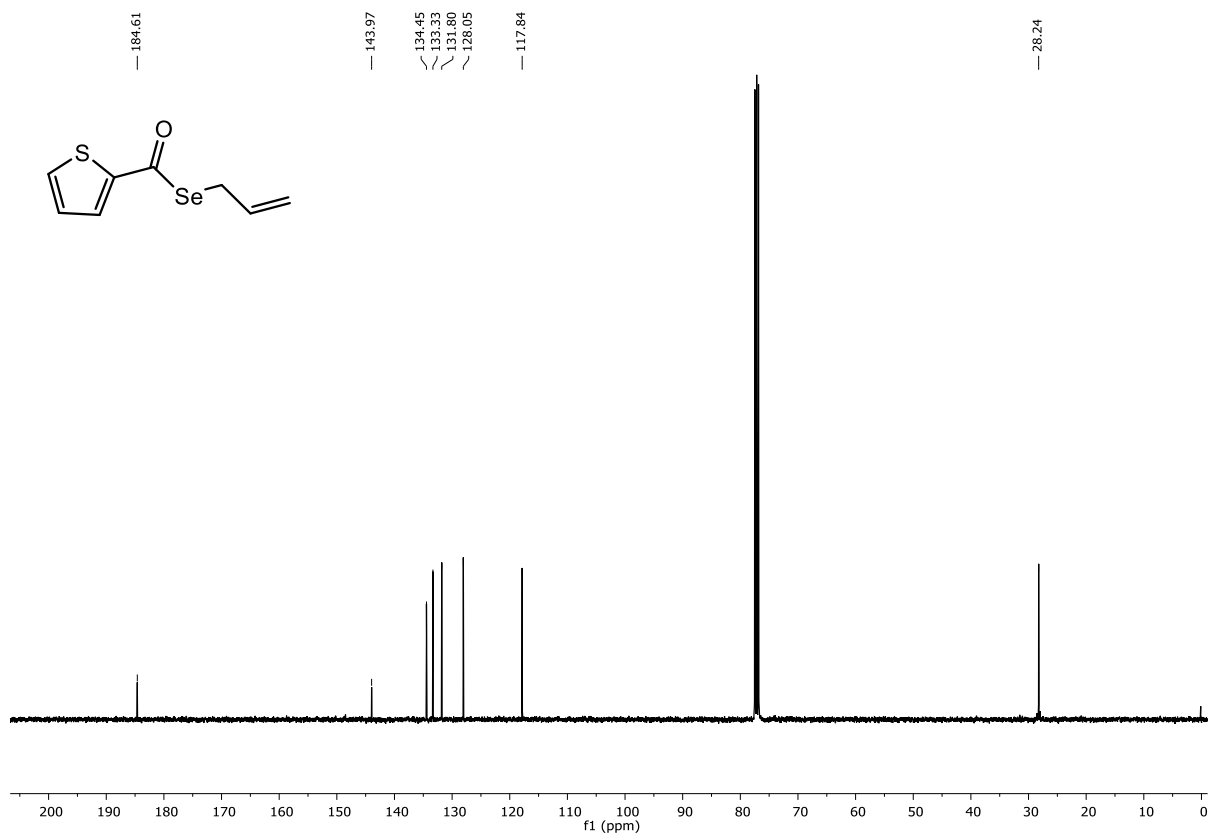

**Figure S30.** <sup>13</sup>C-NMR spectrum of compound **9a**.



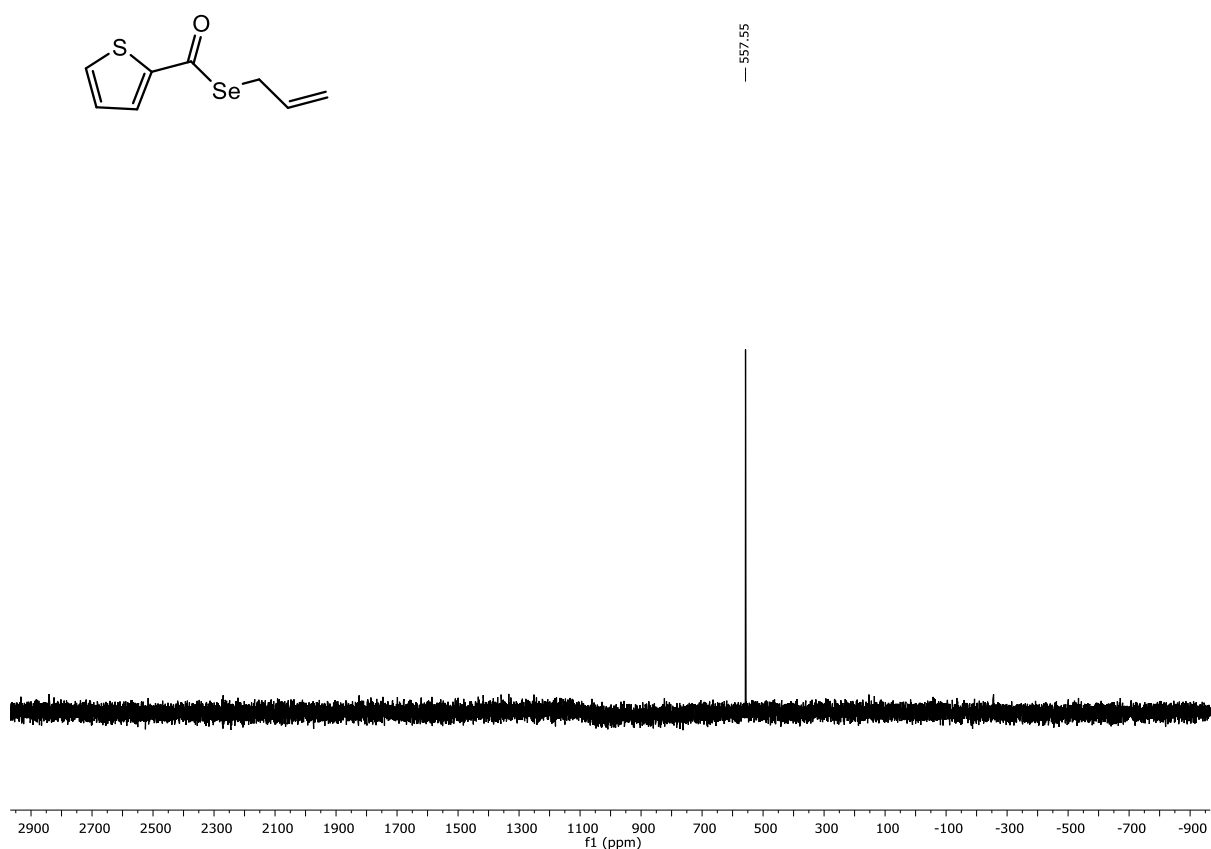

**Figure S31.**  $^{77}\text{Se}$ -NMR spectrum of compound 9a.

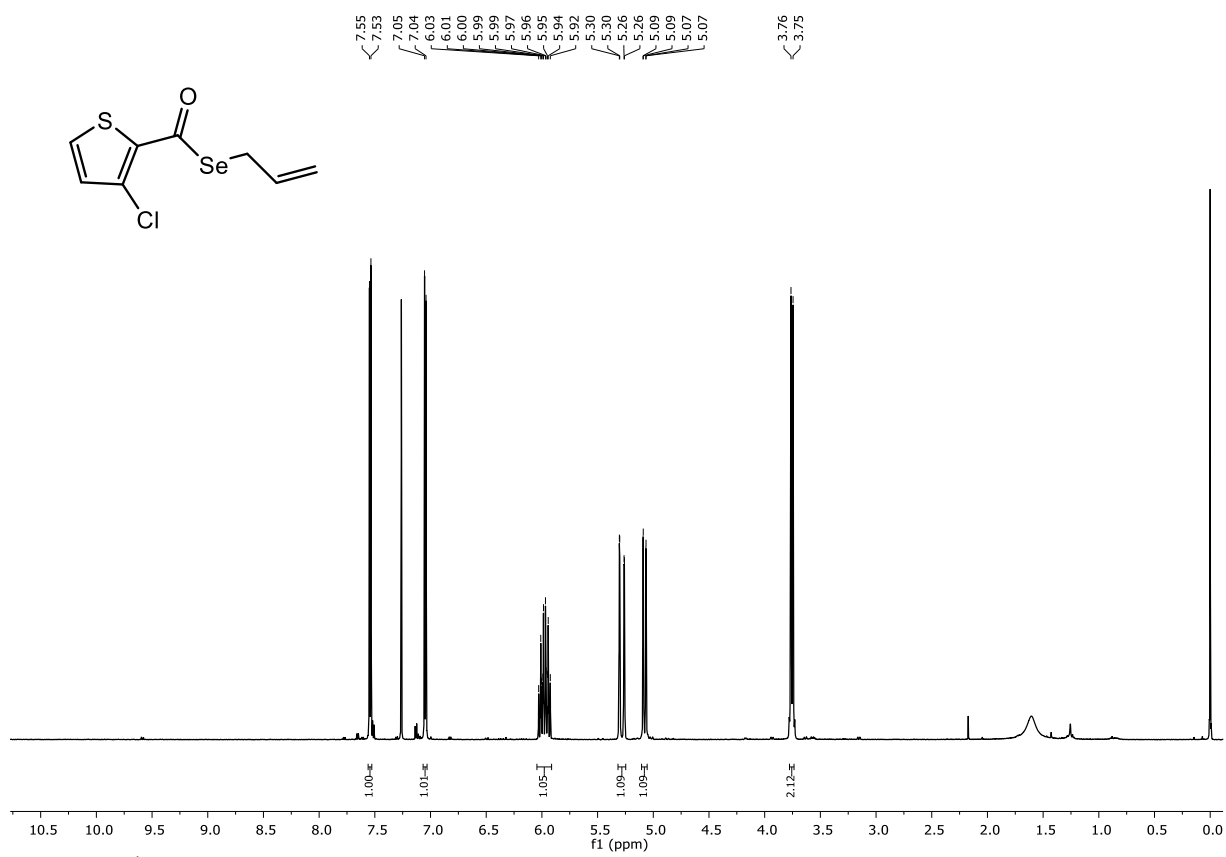

**Figure S32.**  $^1\text{H}$ -NMR spectrum of compound 10a.

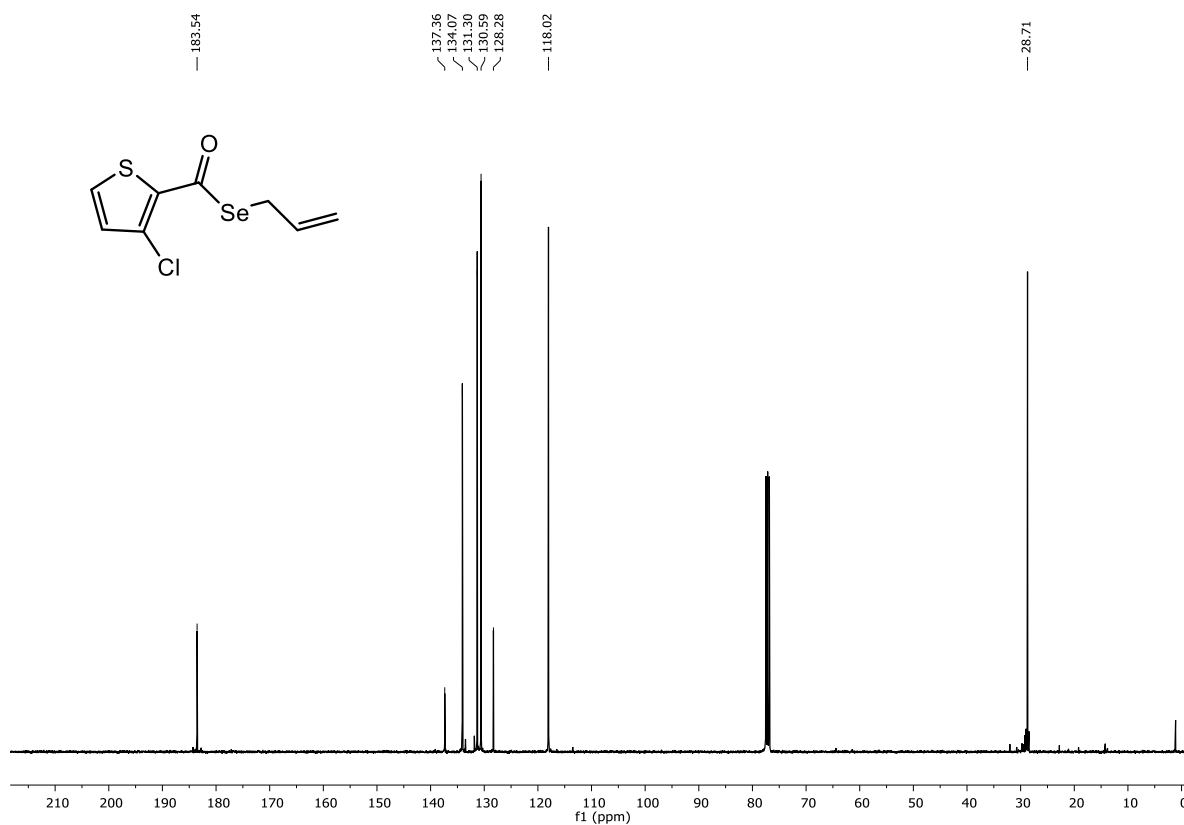

**Figure S33.**  $^{13}\text{C}$ -NMR spectrum of compound **10a**.

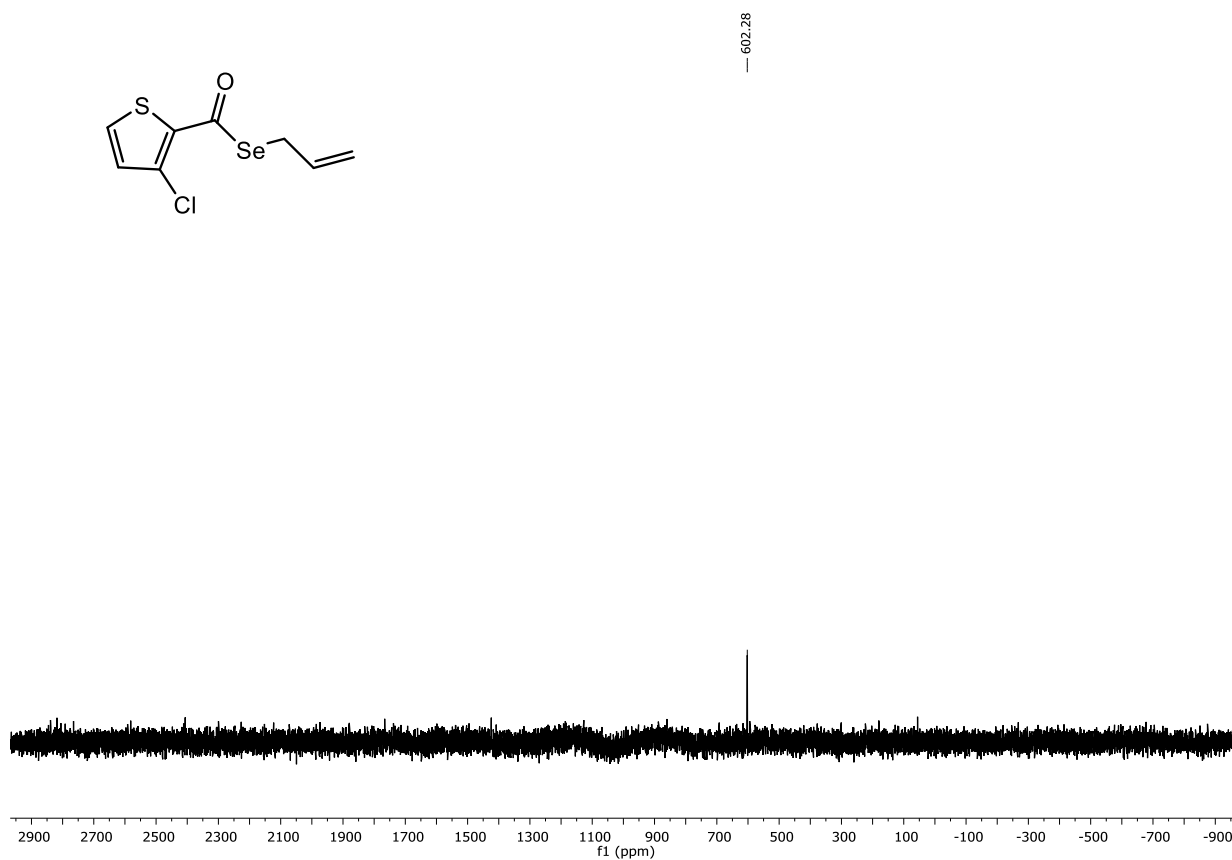

**Figure S34.**  $^{77}\text{Se}$ -NMR spectrum of compound **10a**.

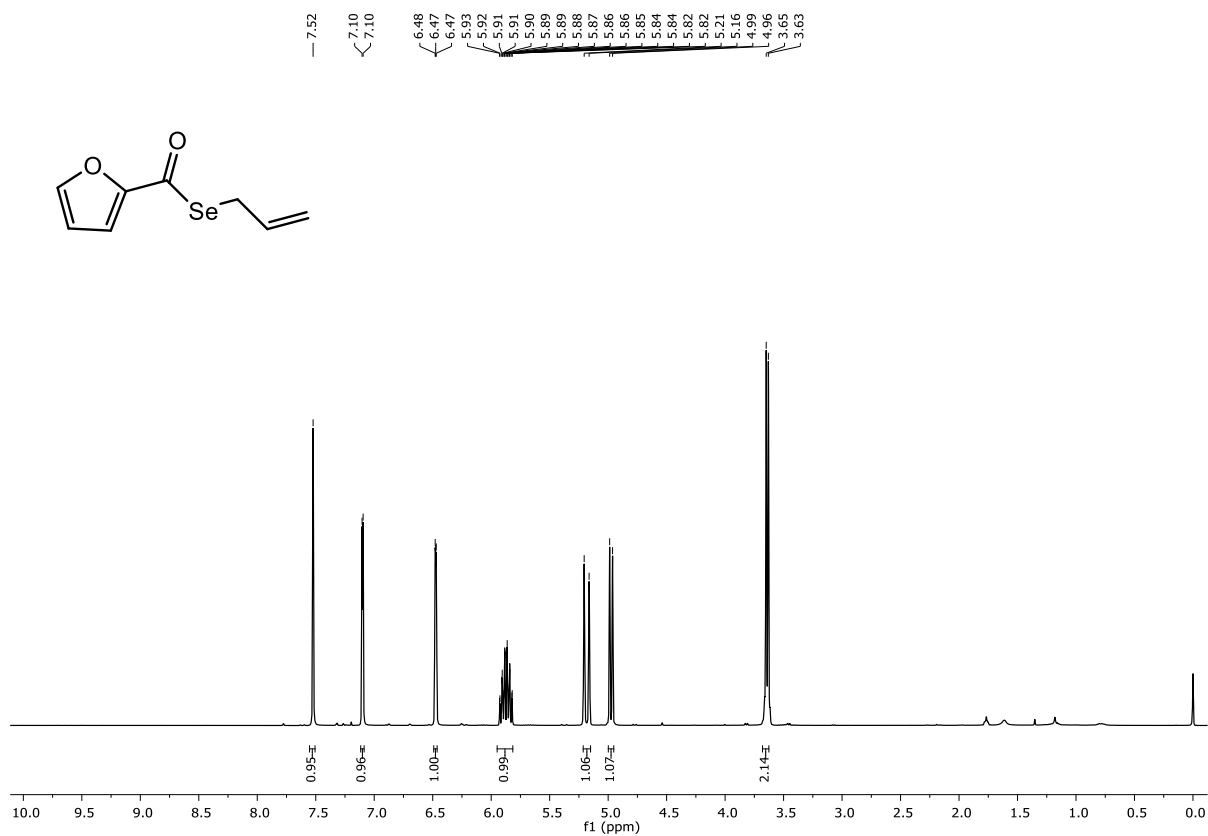

**Figure S35.**  $^1\text{H}$ -NMR spectrum of compound **11a**.

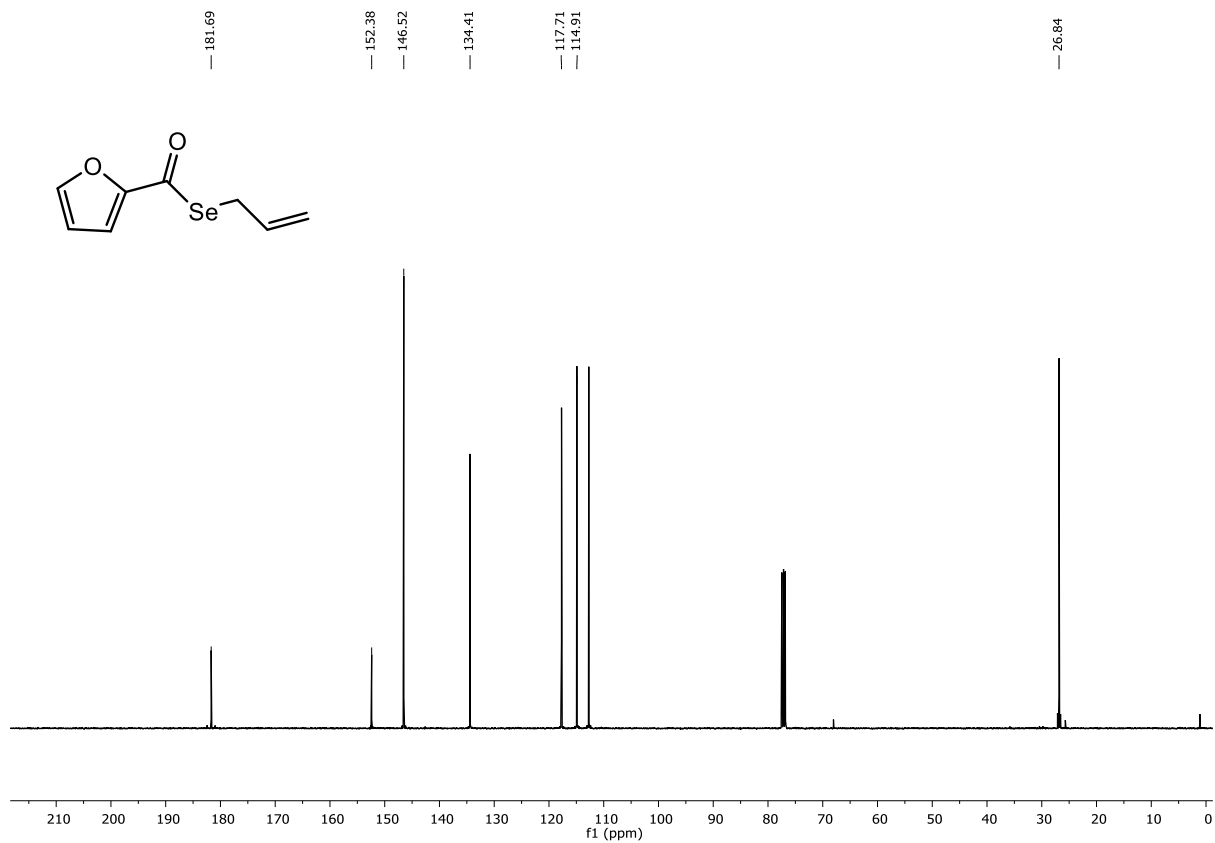

**Figure S36.**  $^{13}\text{C}$ -NMR spectrum of compound **11a**.

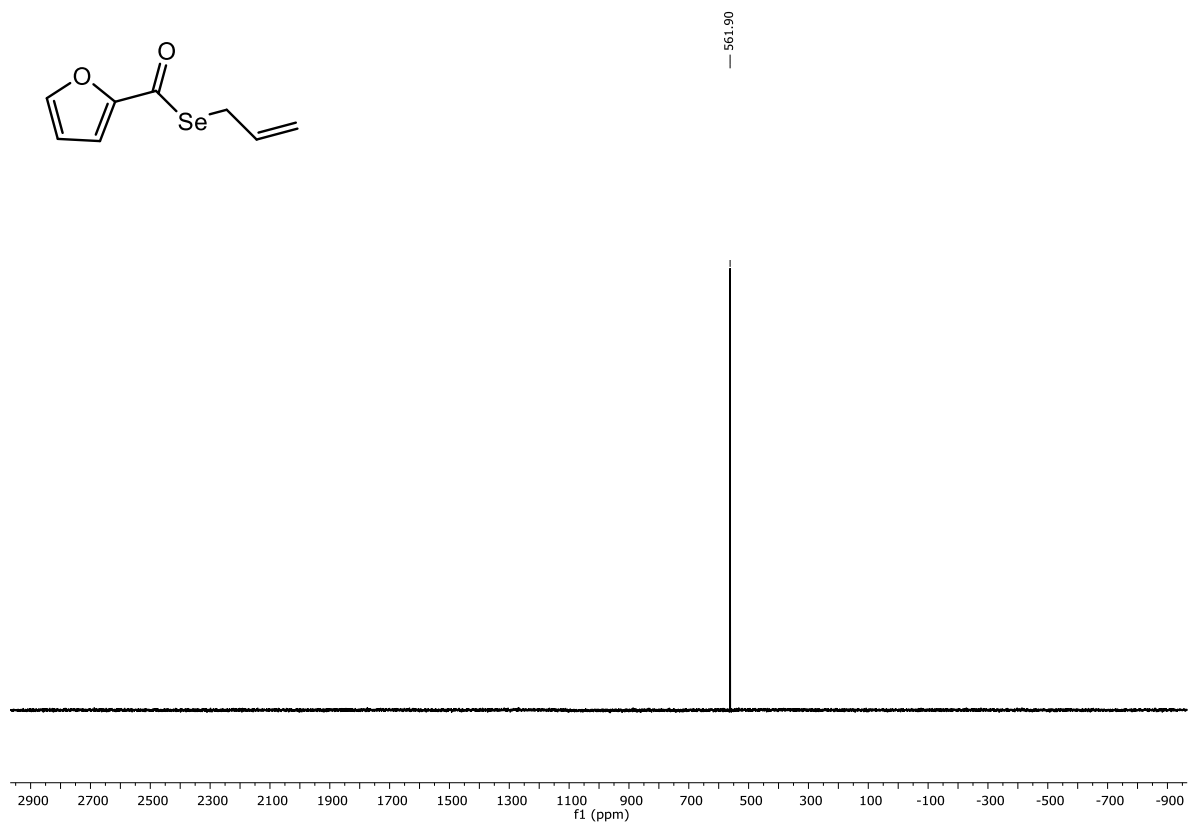

Figure S37. <sup>77</sup>Se-NMR spectrum of compound 11a.

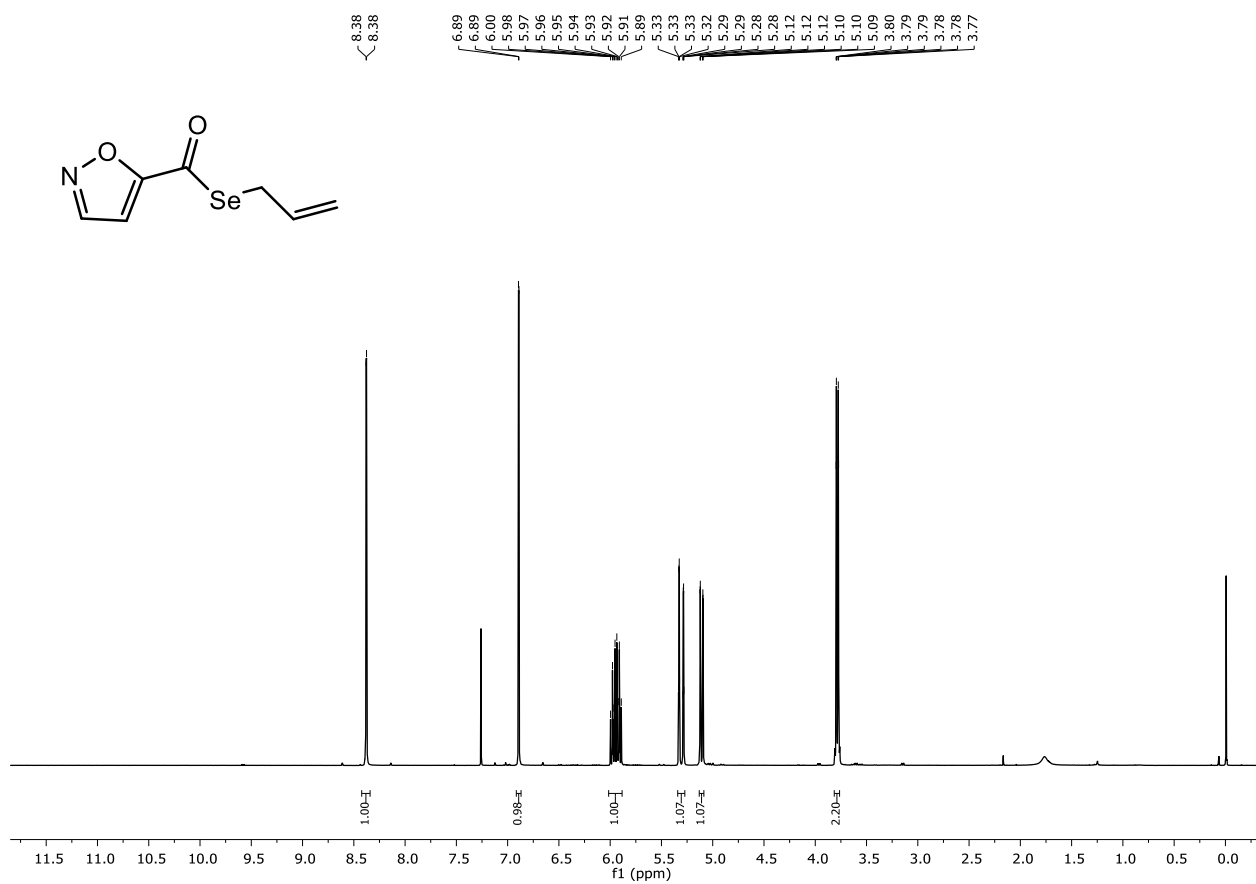

Figure S38. <sup>1</sup>H-NMR spectrum of compound 12a.

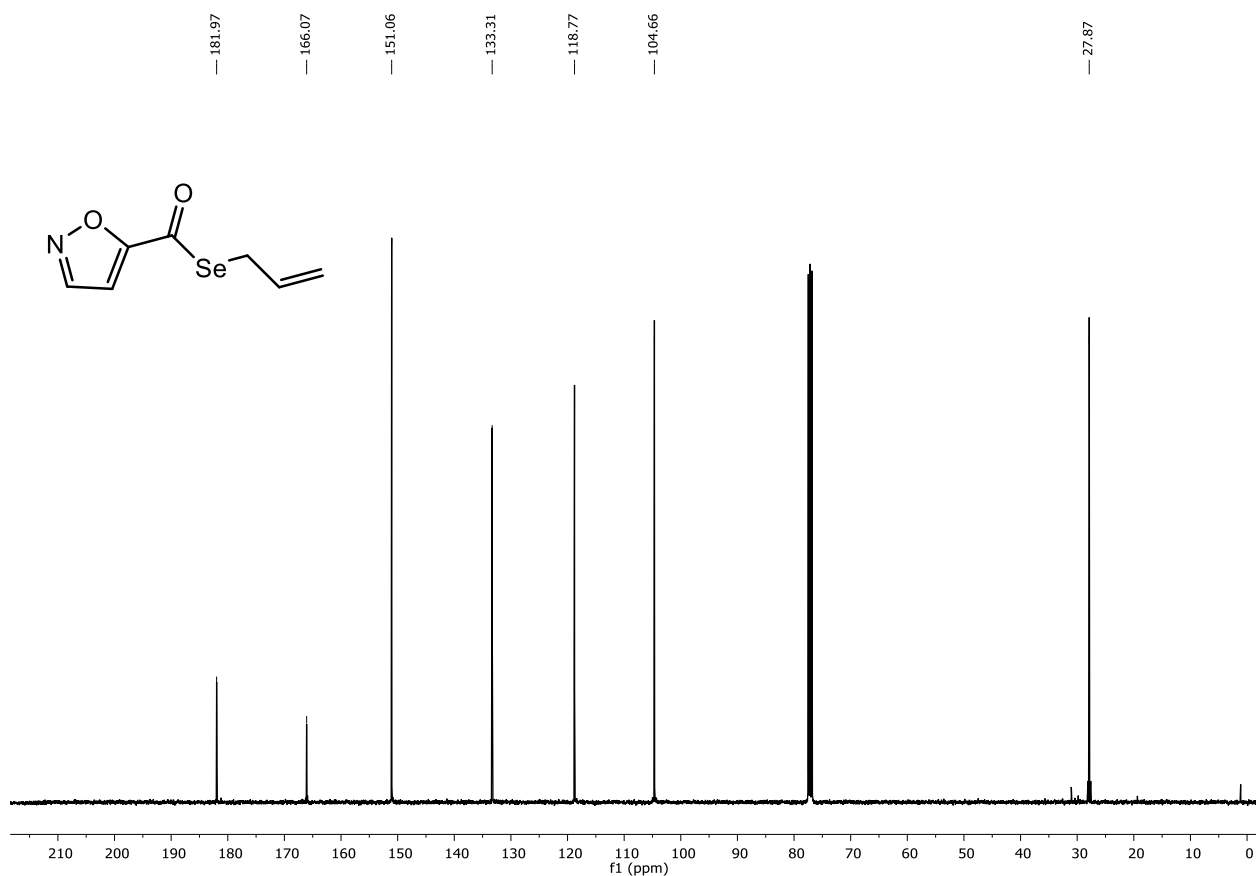

**Figure S39.** <sup>13</sup>C-NMR spectrum of compound **12a**.

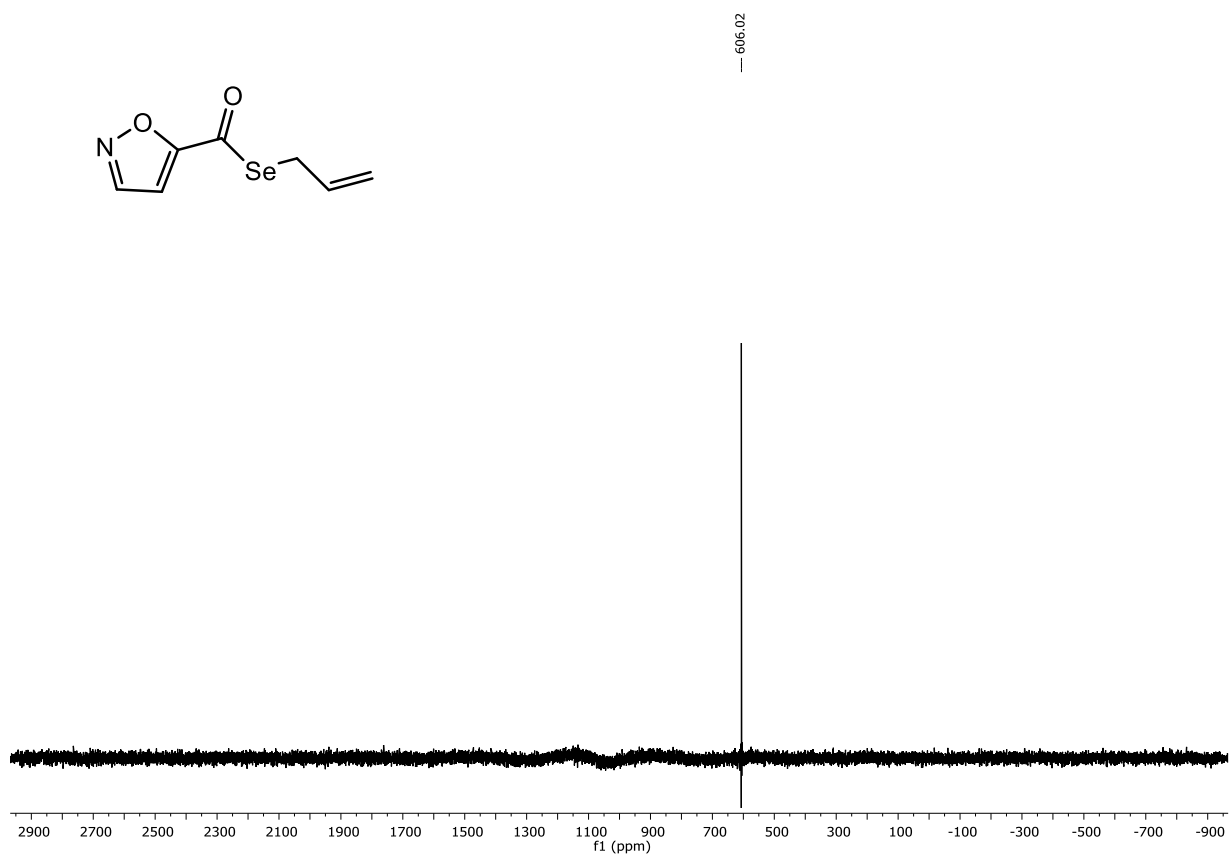

**Figure S40.** <sup>77</sup>Se-NMR spectrum of compound **12a**.

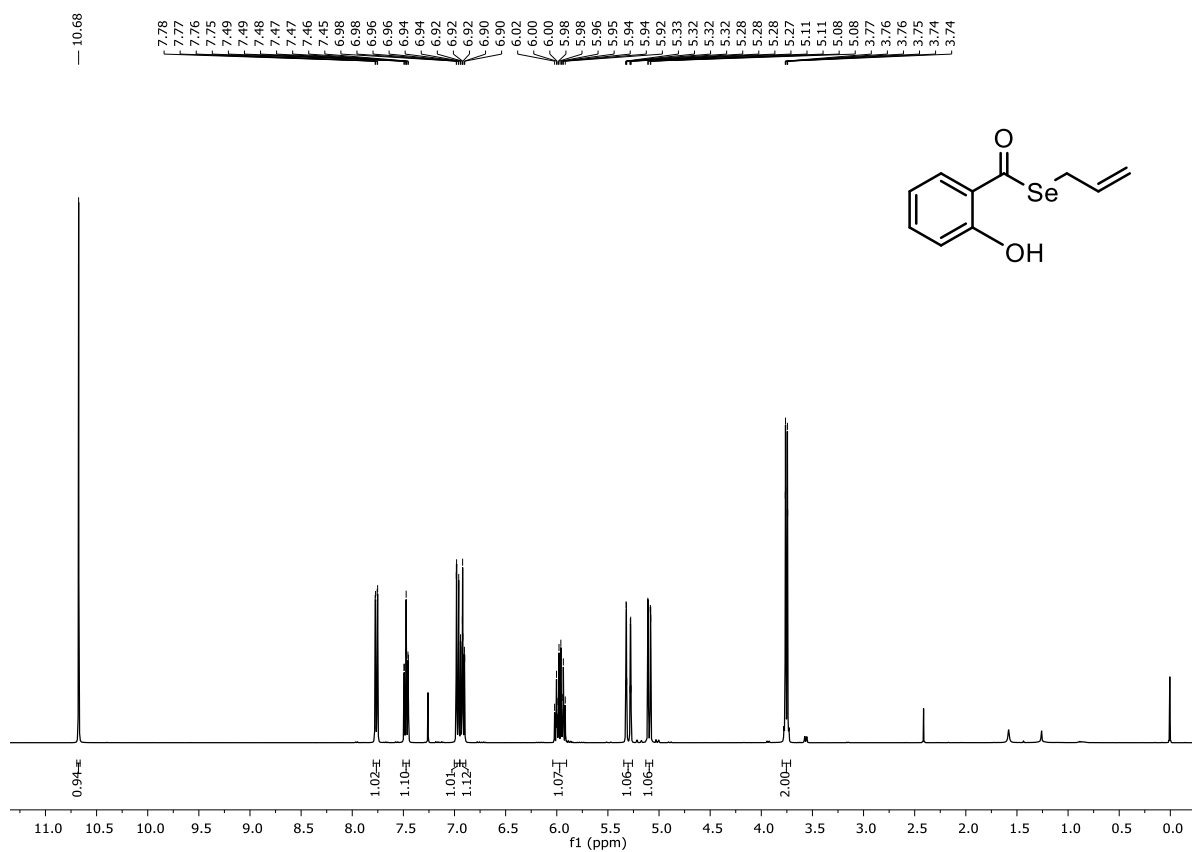

Figure S41. <sup>1</sup>H-NMR spectrum of compound 13a.

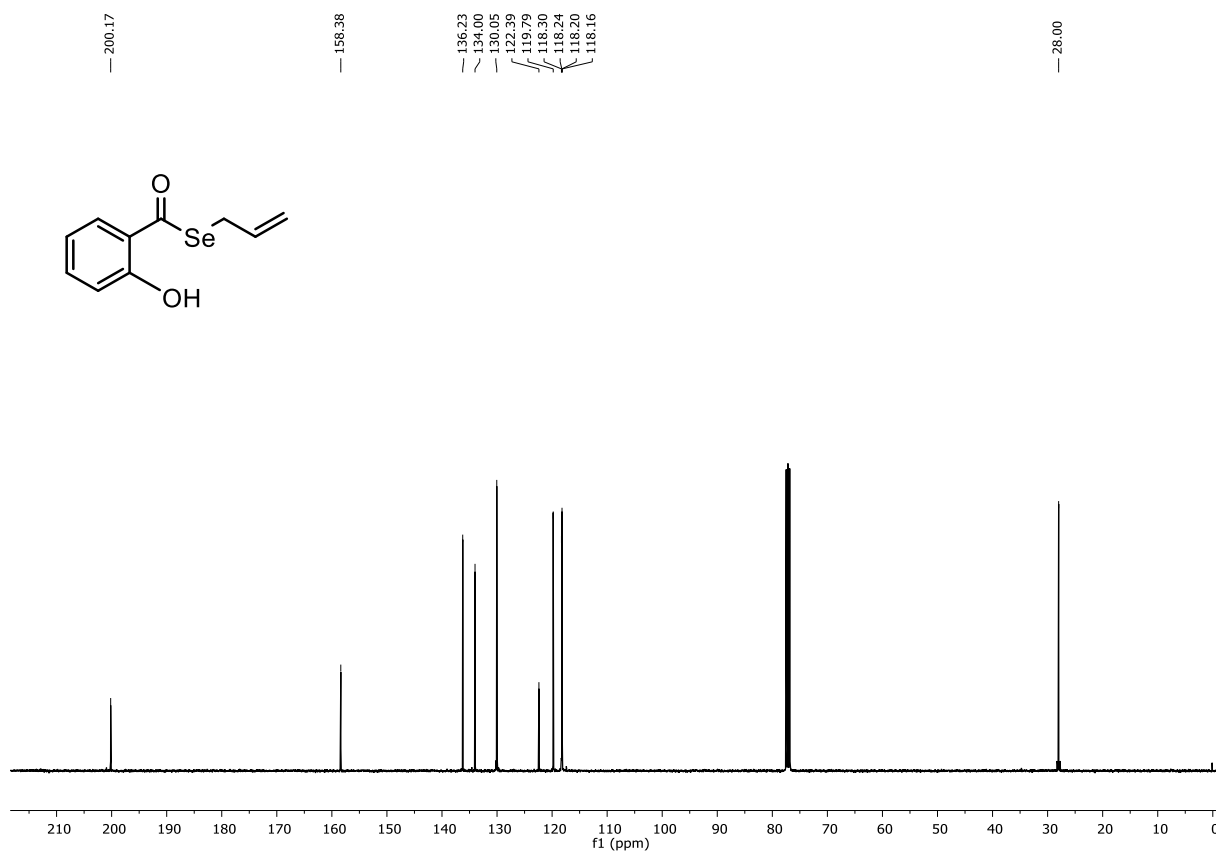

Figure S42. <sup>13</sup>C-NMR spectrum of compound 13a.

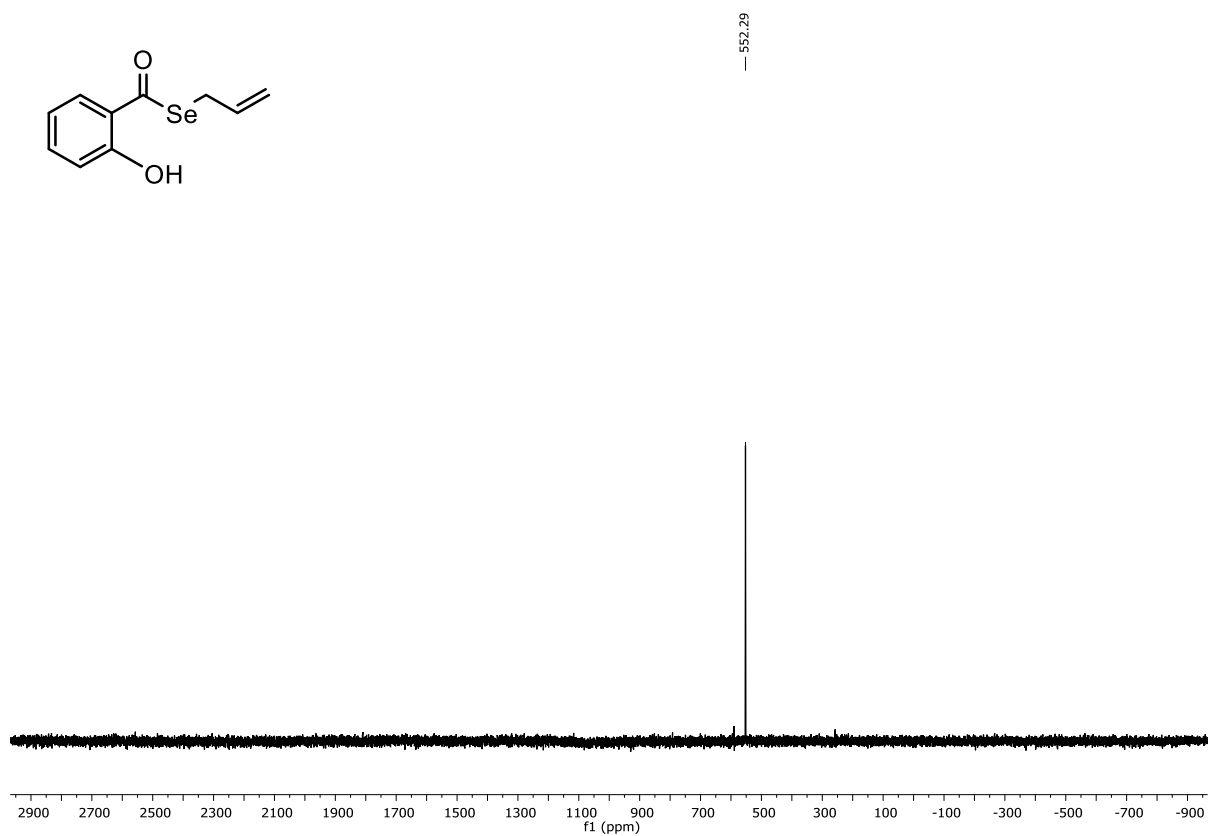

Figure S43.  $^{77}\text{Se}$ -NMR spectrum of compound 13a.

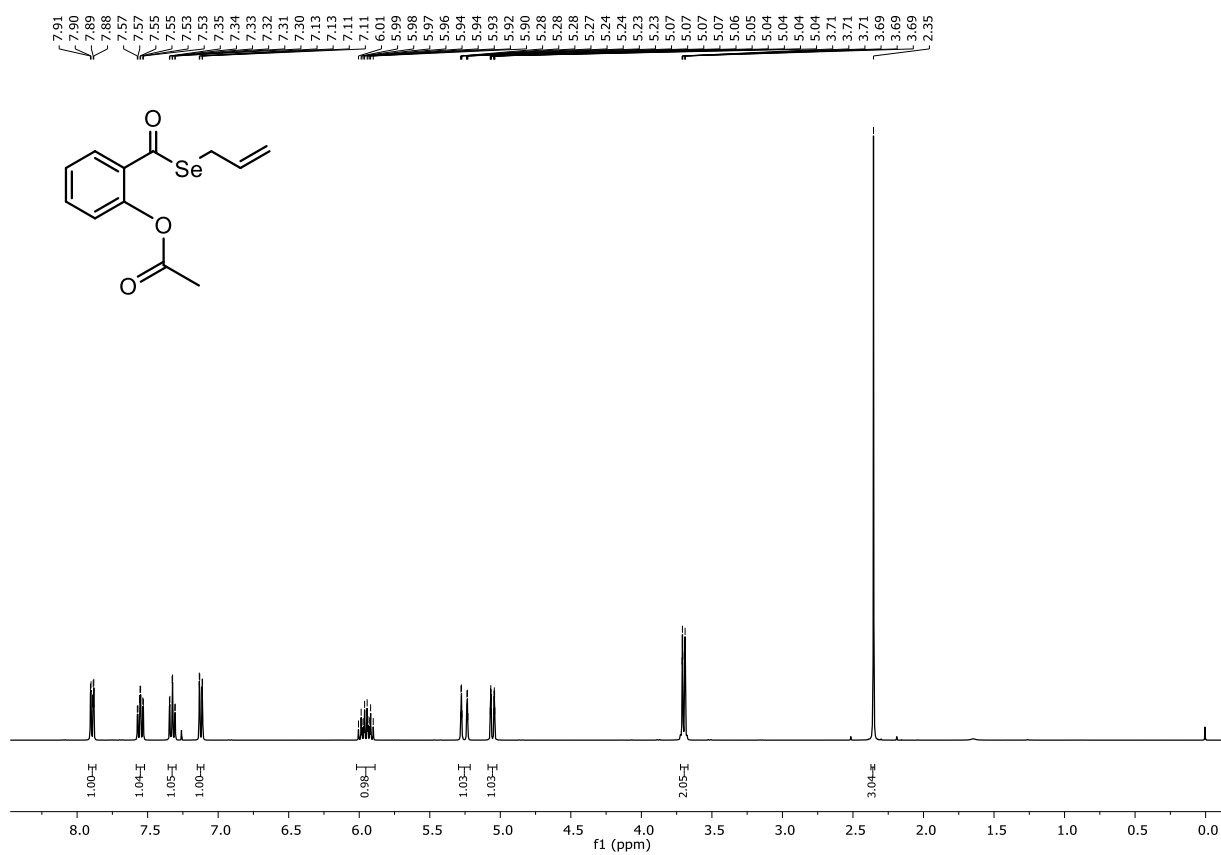

Figure S44.  $^1\text{H}$ -NMR spectrum of compound 14a.

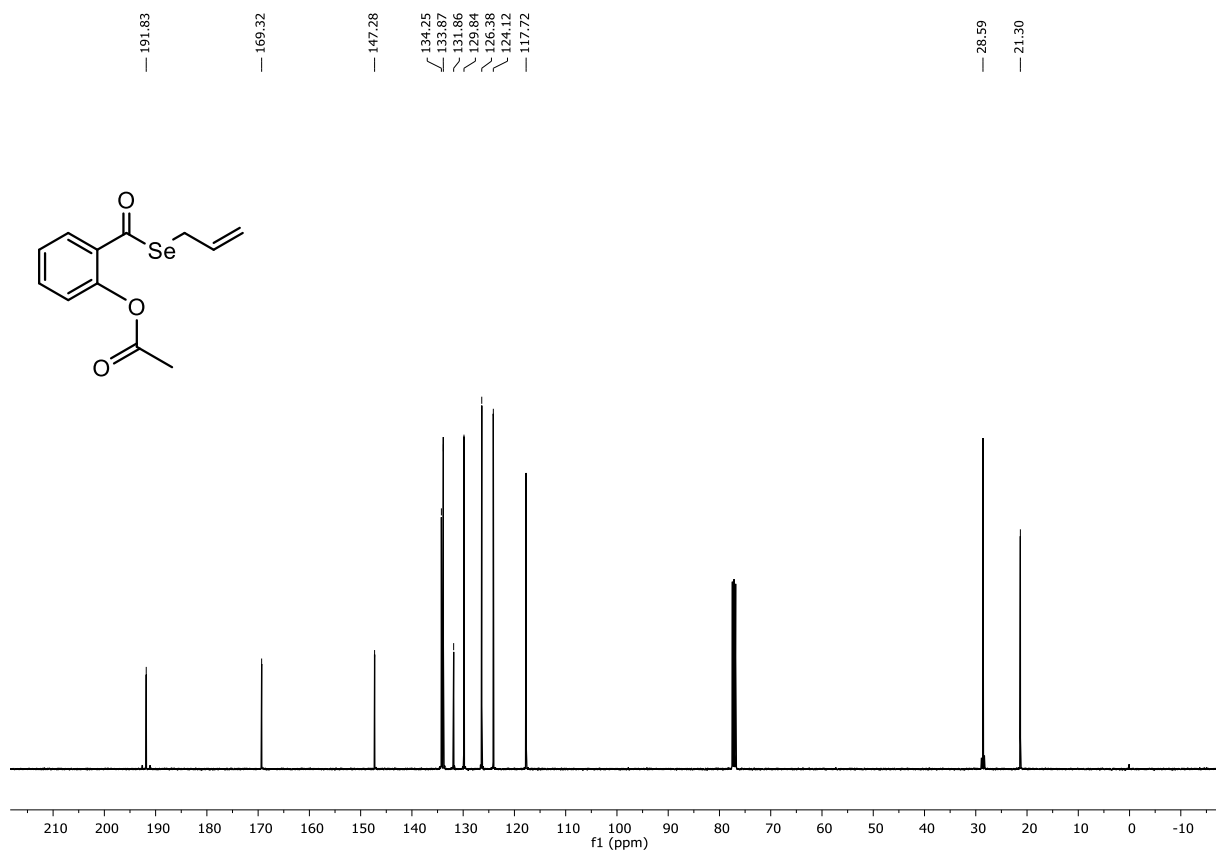

**Figure S45.** <sup>13</sup>C-NMR spectrum of compound **14a**.

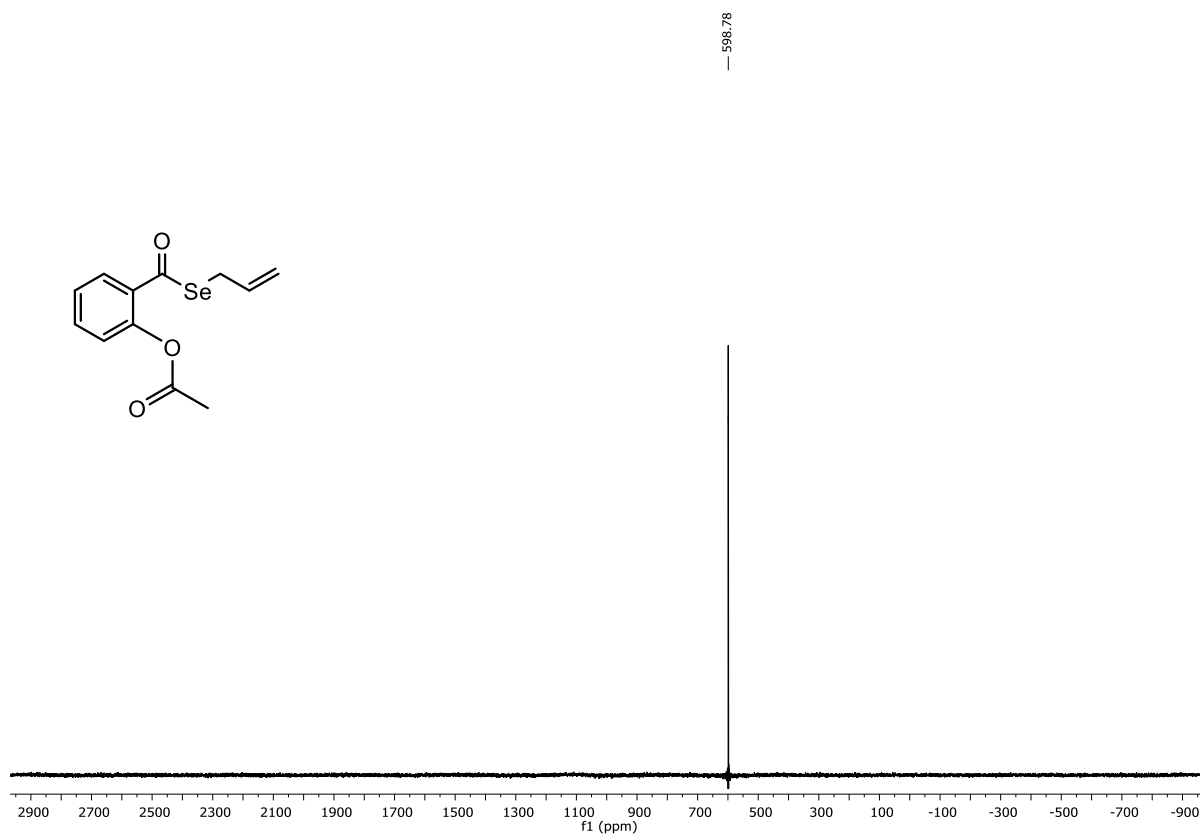

**Figure S46.** <sup>77</sup>Se-NMR spectrum of compound **14a**.



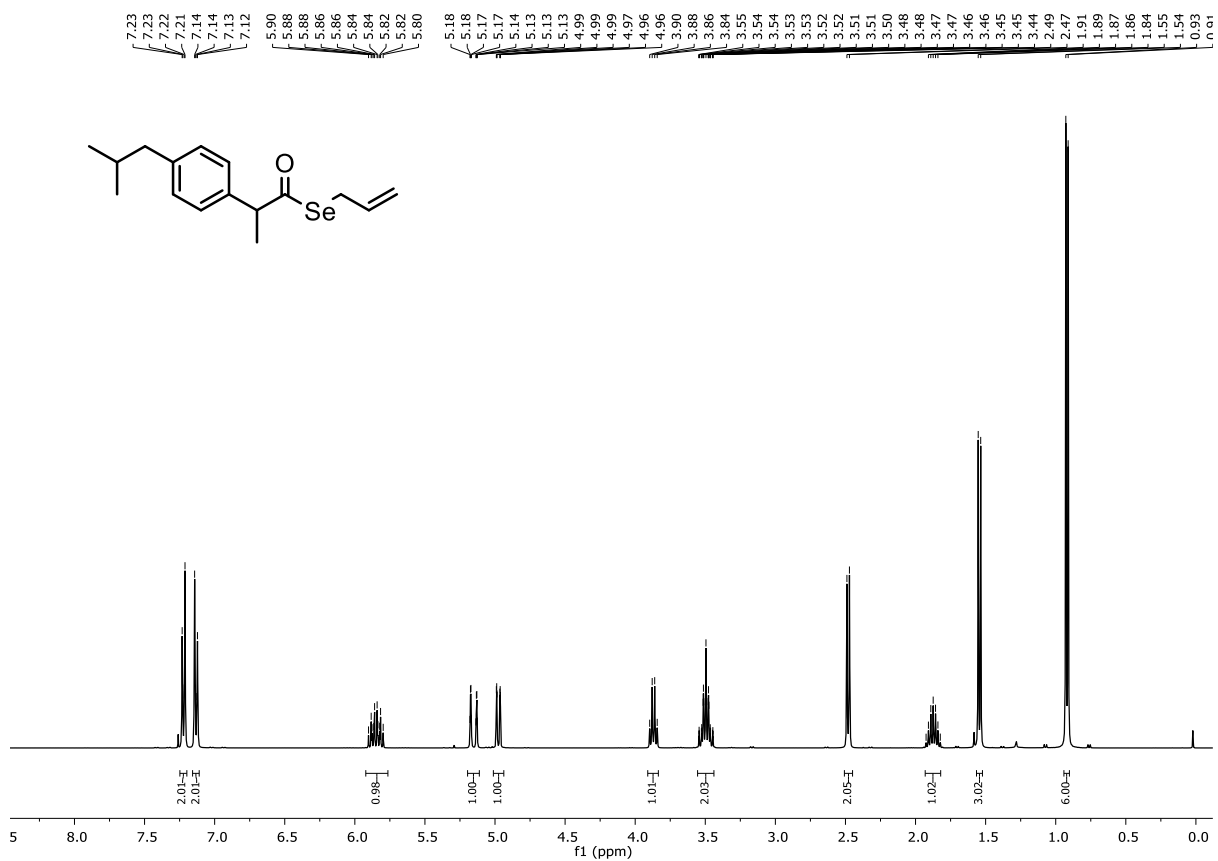

Figure S47. <sup>1</sup>H-NMR spectrum of compound **15a**.

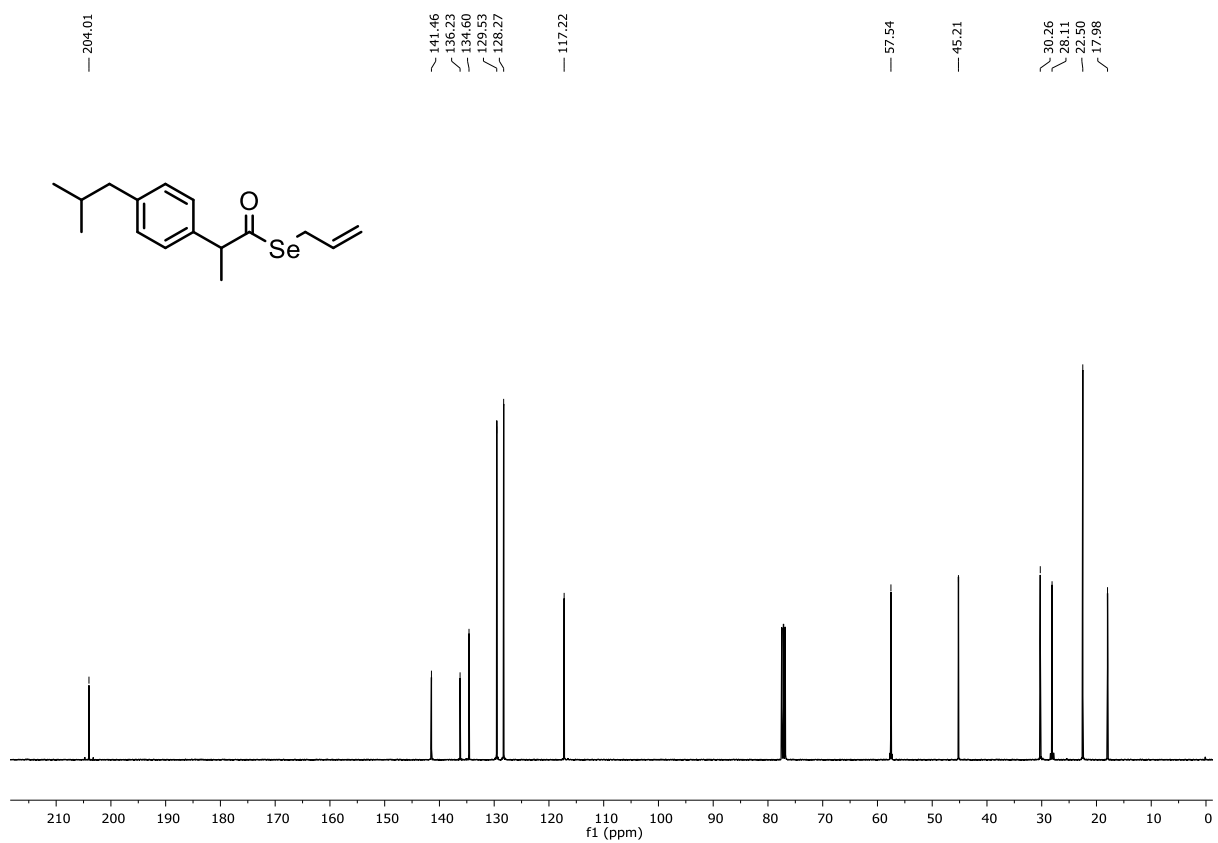

Figure S48. <sup>13</sup>C-NMR spectrum of compound **15a**.

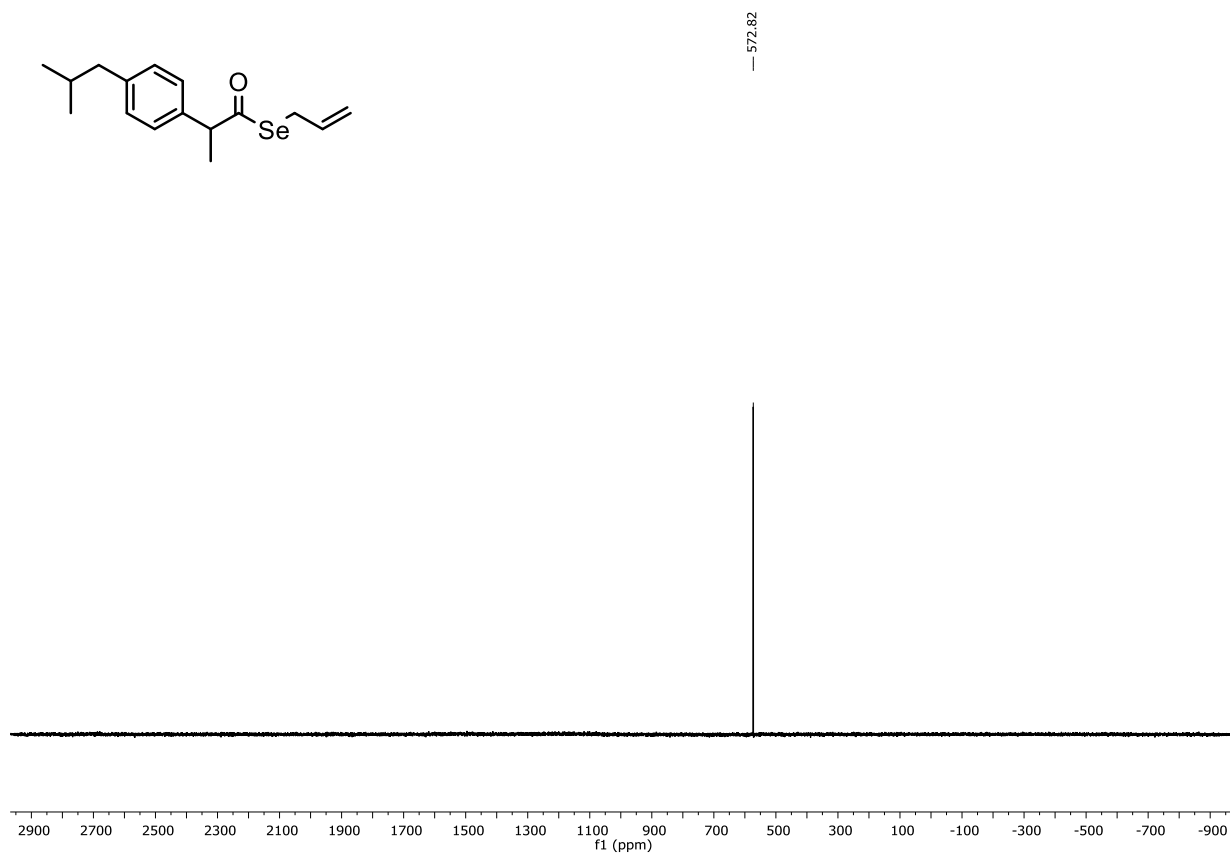

Figure S49. <sup>77</sup>Se-NMR spectrum of compound **15a**.

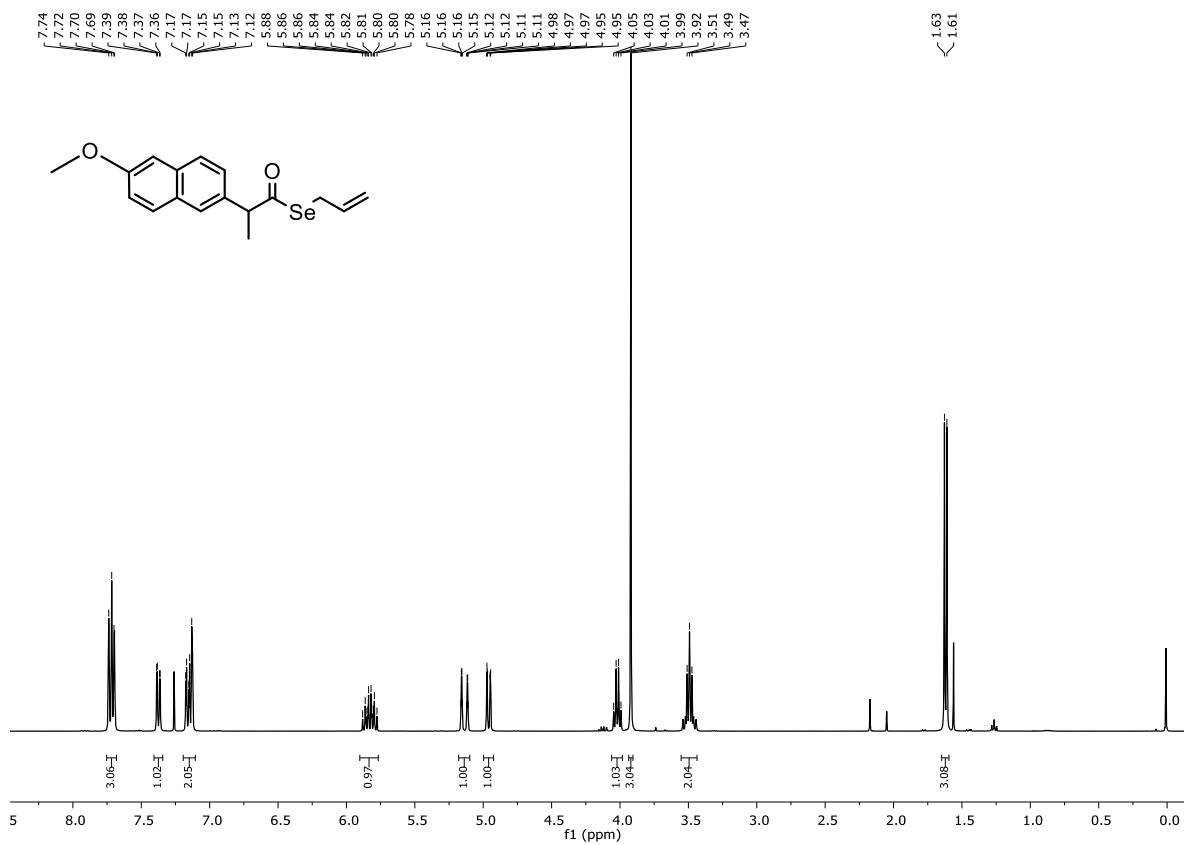

Figure S50. <sup>1</sup>H-NMR spectrum of compound **16a**.

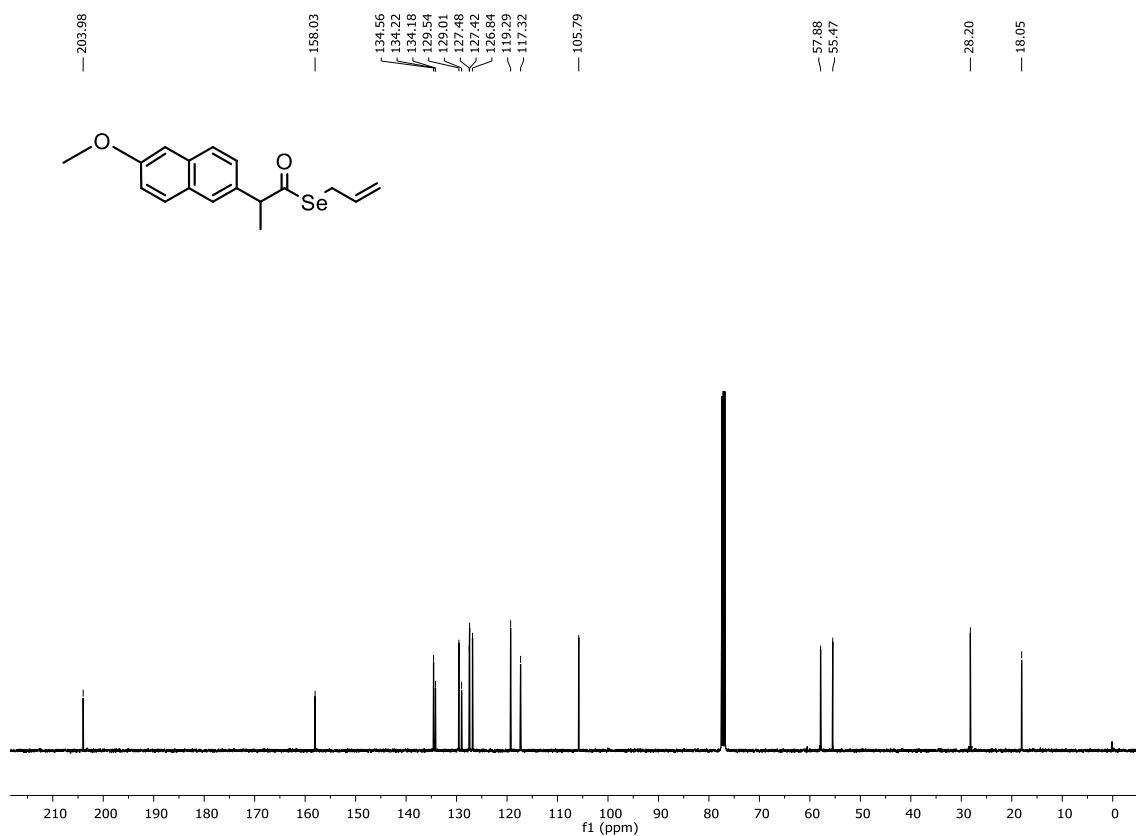

**Figure S51.**  $^{13}\text{C}$ -NMR spectrum of compound **16a**.

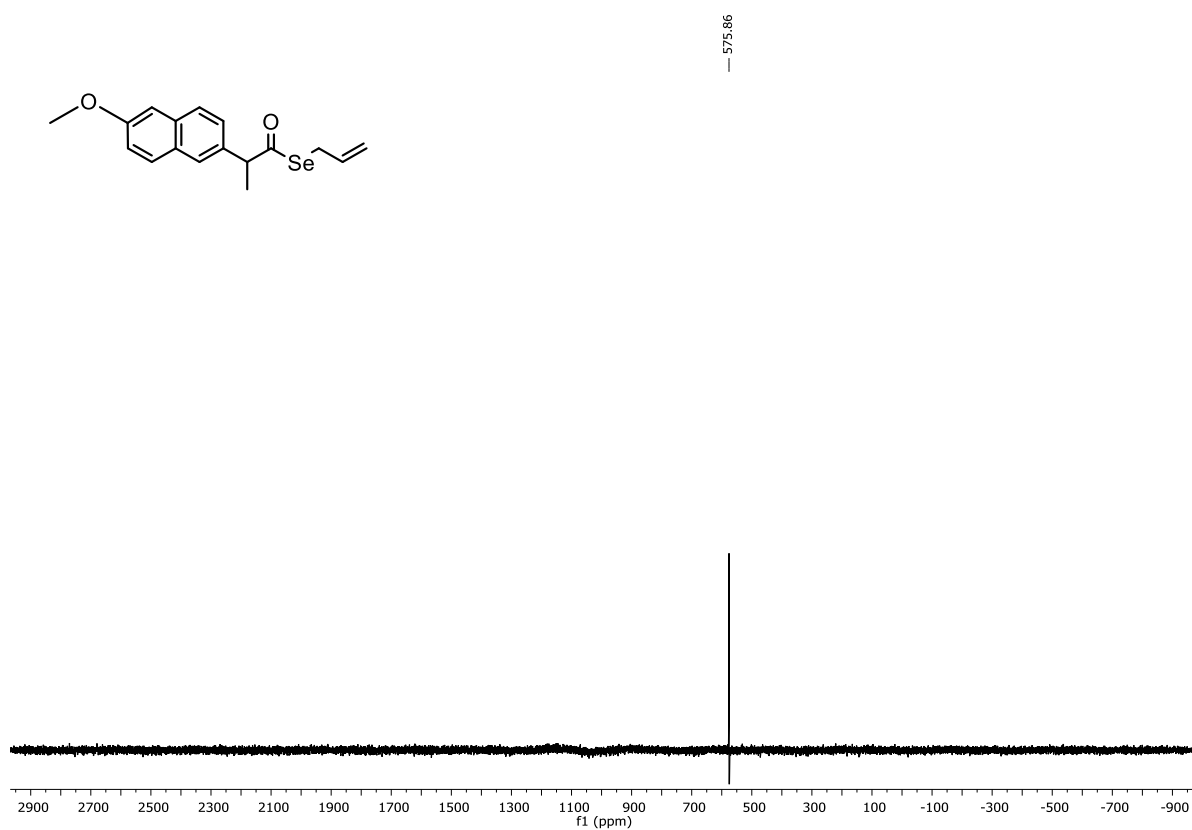

**Figure S52.**  $^{77}\text{Se}$ -NMR spectrum of compound **16a**.

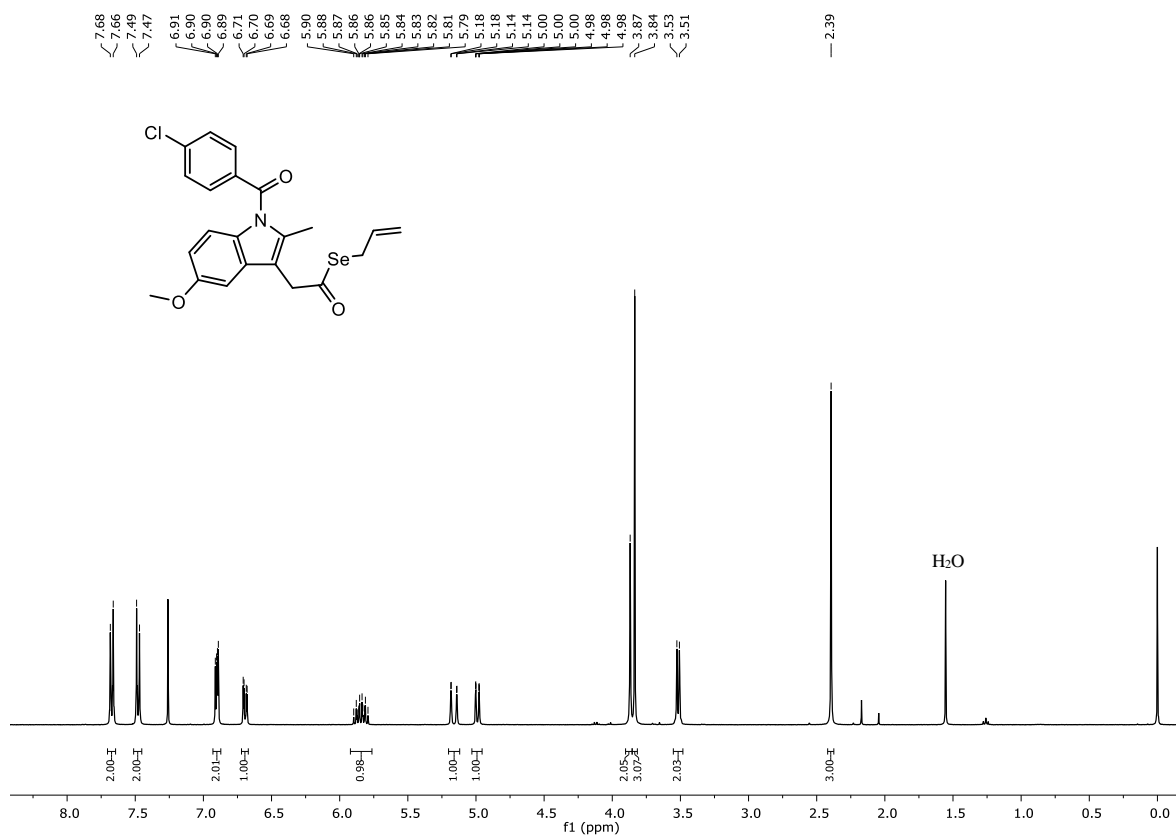

Figure S53. <sup>1</sup>H-NMR spectrum of compound **17a**.

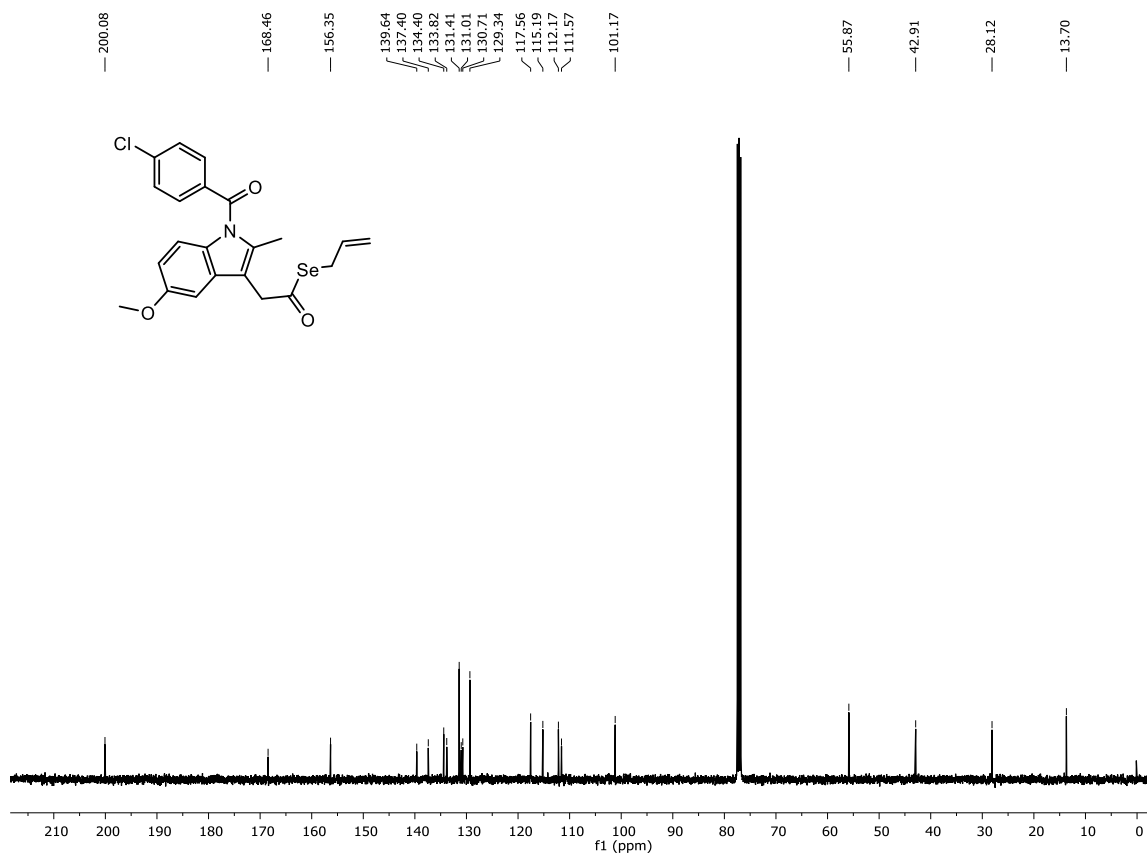

Figure S54. <sup>13</sup>C-NMR spectrum of compound **17a**.

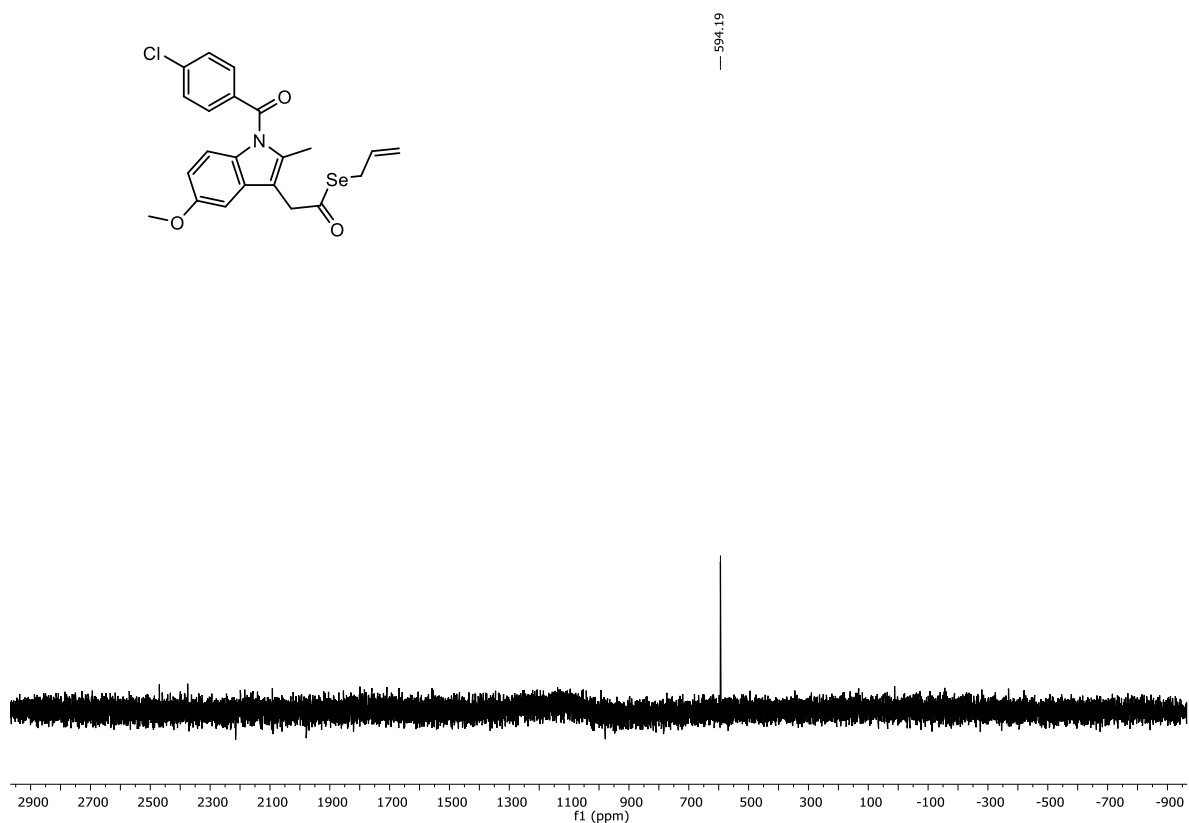

**Figure S55.**  $^{77}\text{Se}$ -NMR spectrum of compound **17a**.

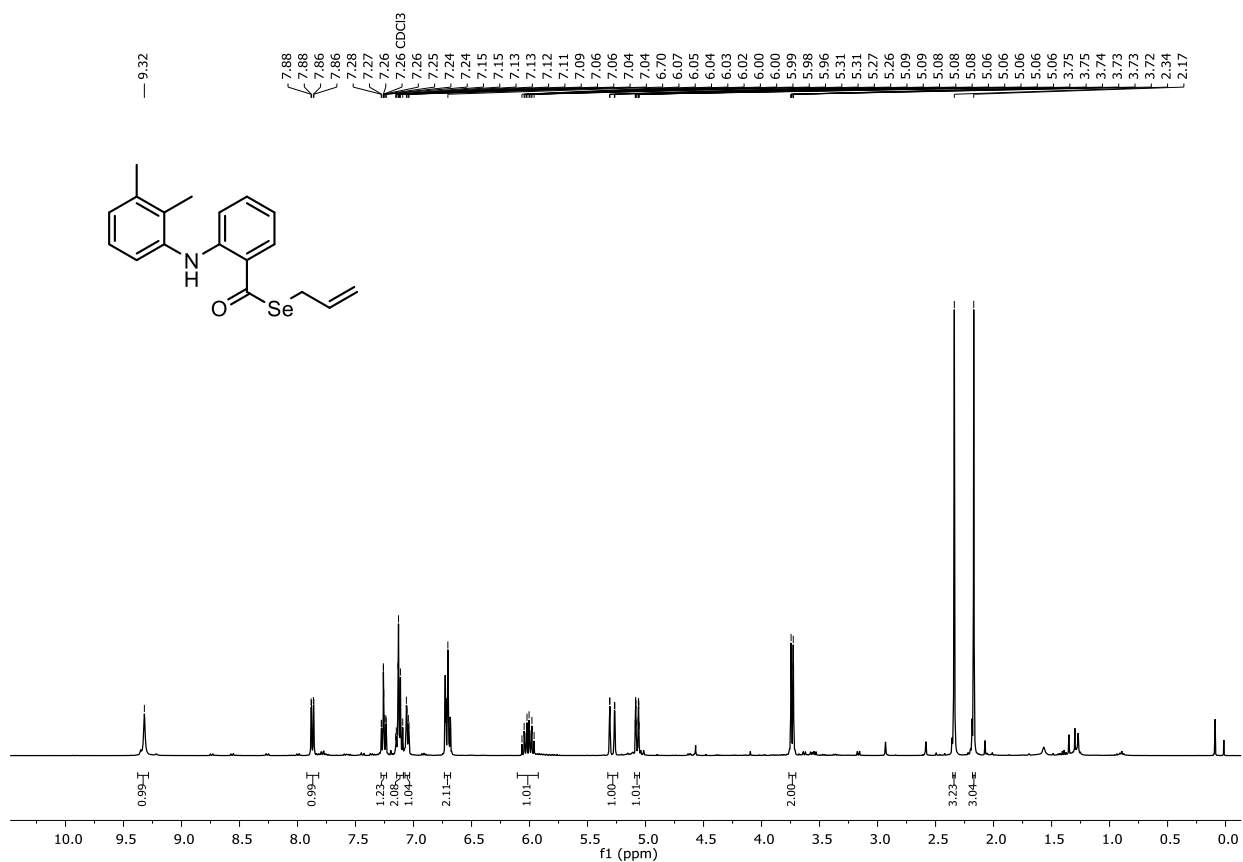

**Figure S56.**  $^1\text{H}$ -NMR spectrum of compound **18a**.

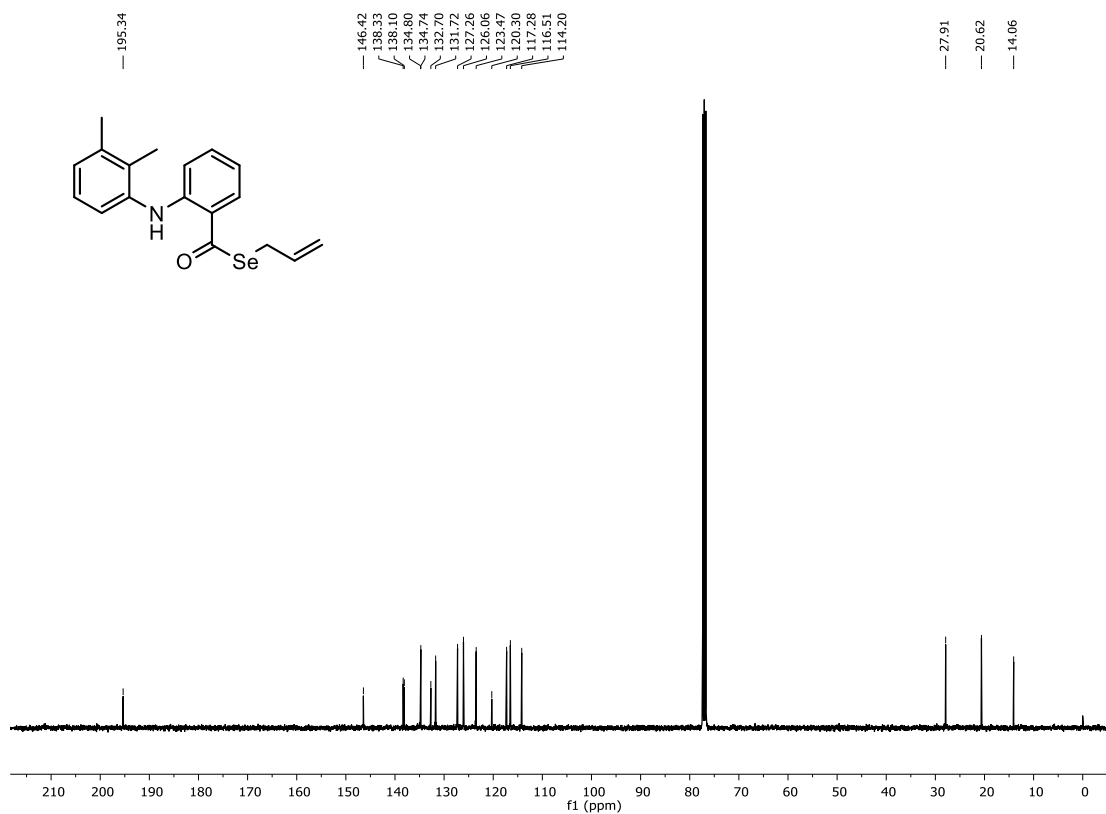

**Figure S57.** <sup>13</sup>C-NMR spectrum of compound **18a**.

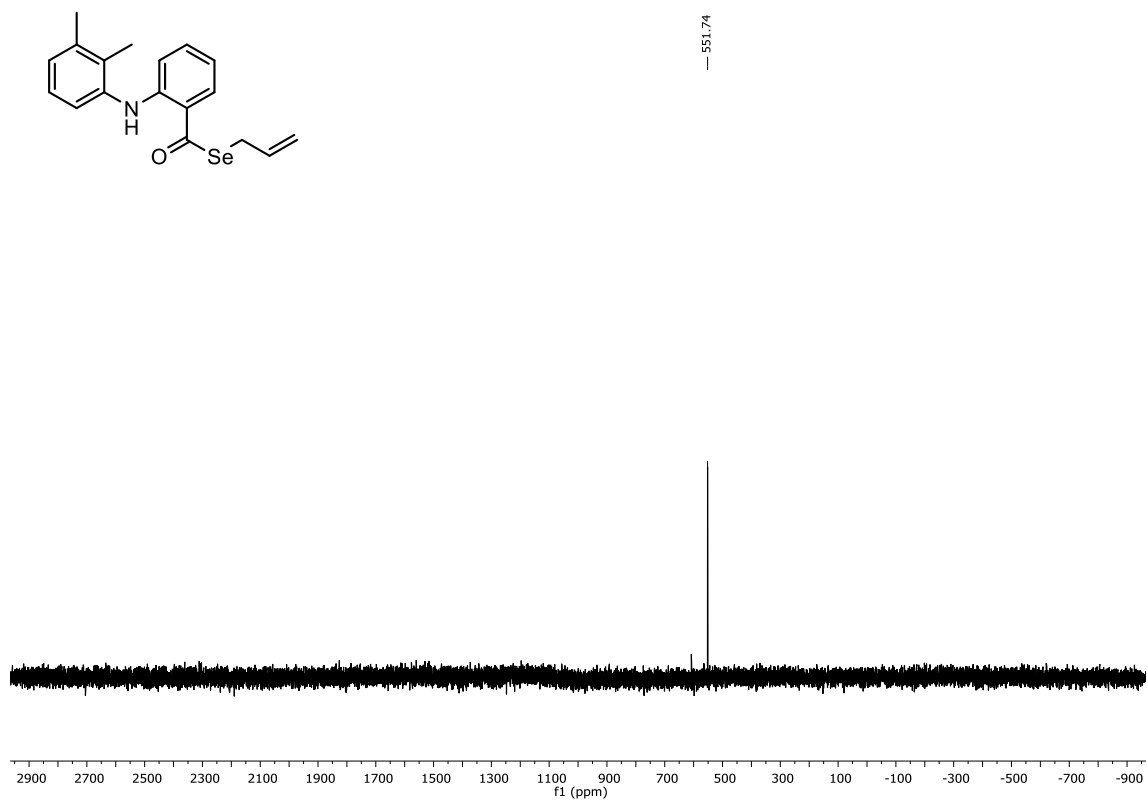

**Figure S58.** <sup>77</sup>Se-NMR spectrum of compound **18a**.

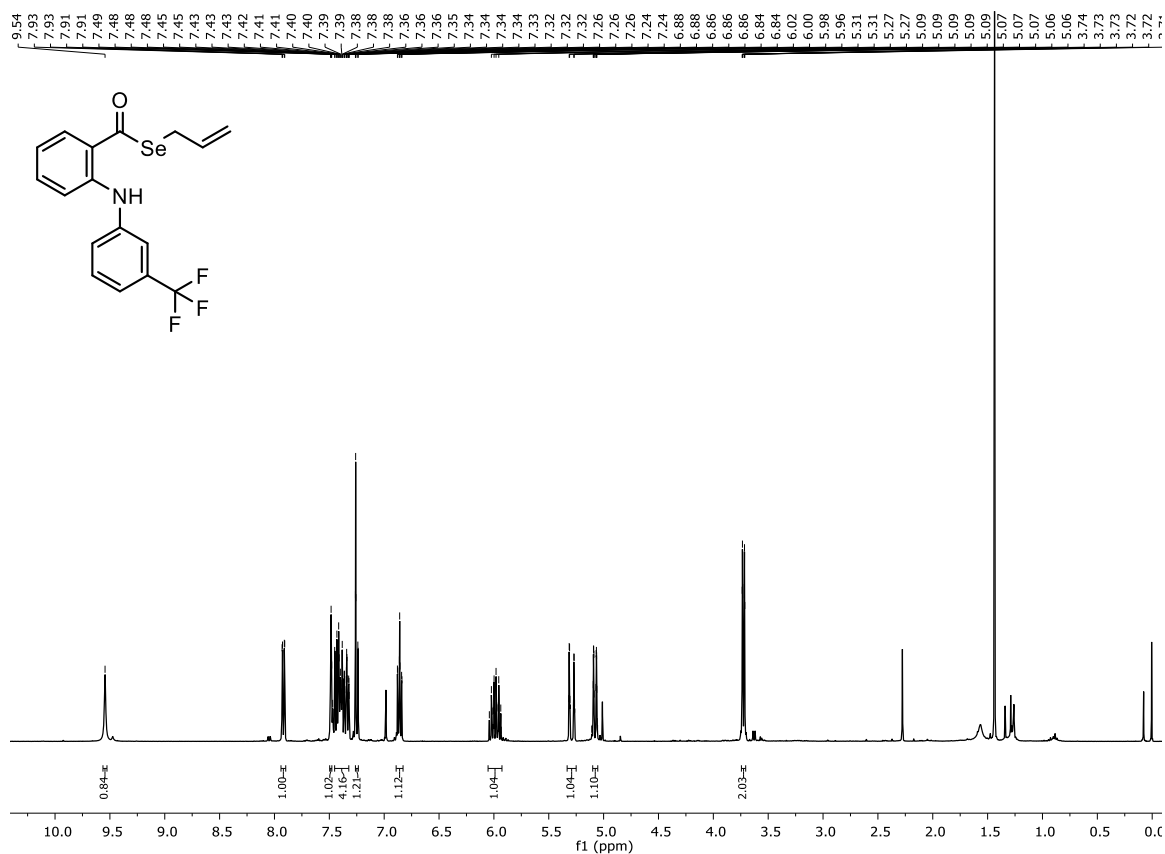

Figure S59. <sup>1</sup>H-NMR spectrum of compound 19a.

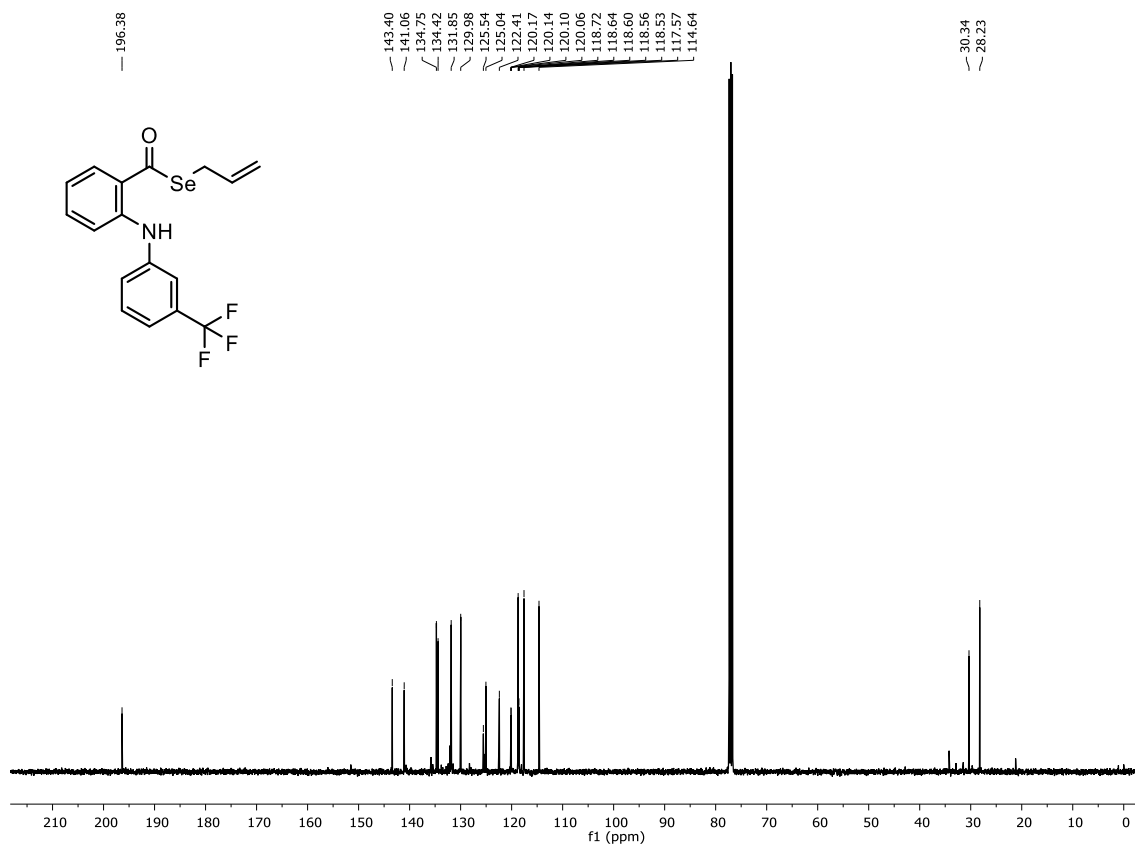

Figure S60. <sup>13</sup>C-NMR spectrum of compound 19a.

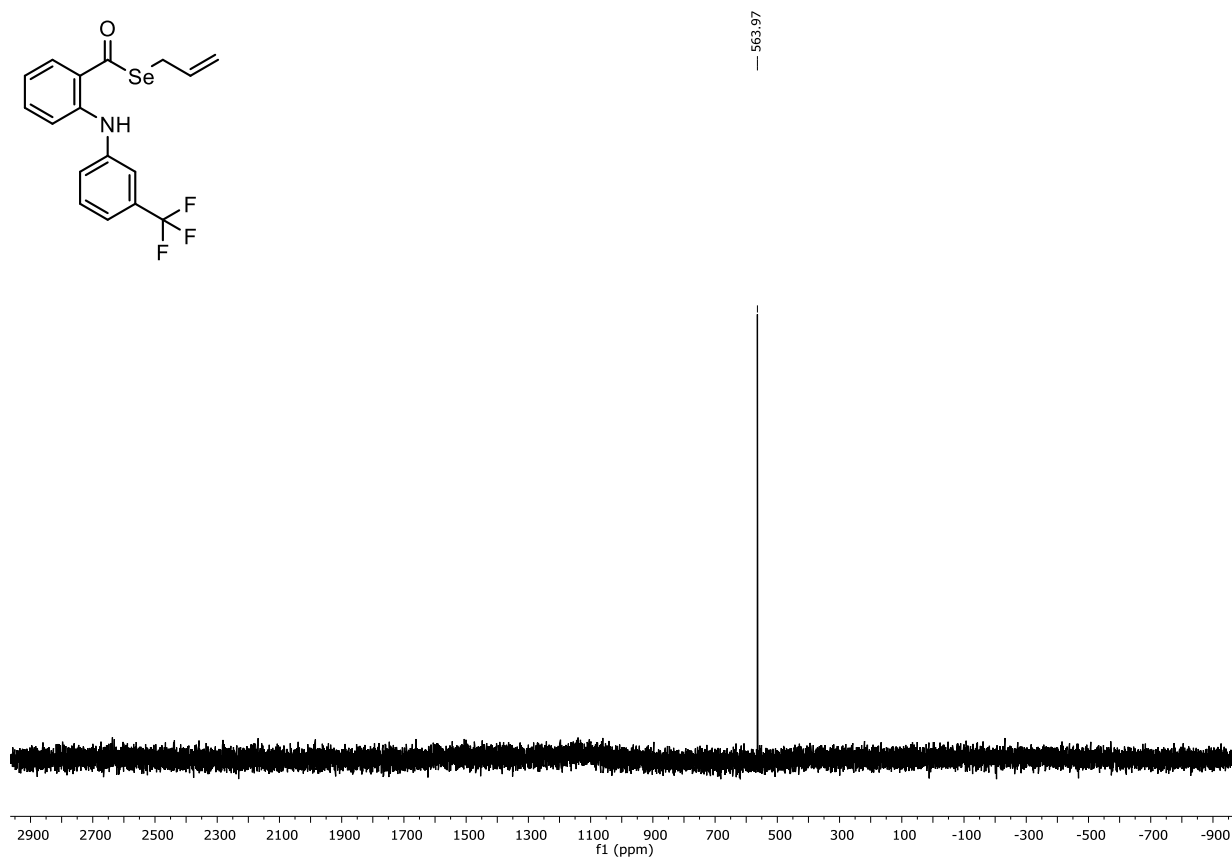

**Figure S61.** <sup>77</sup>Se-NMR spectrum of compound **19a**.

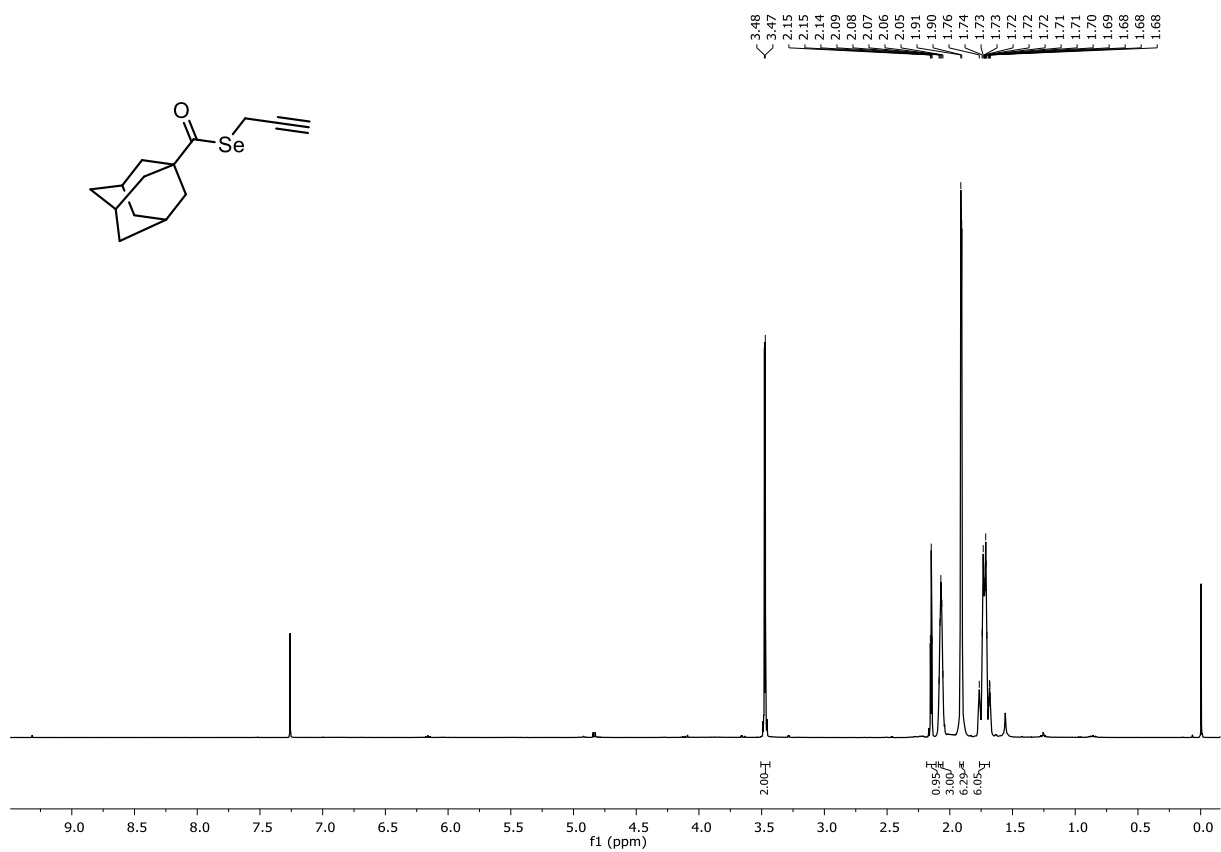

**Figure S62.** <sup>1</sup>H-NMR spectrum of compound **1b**.



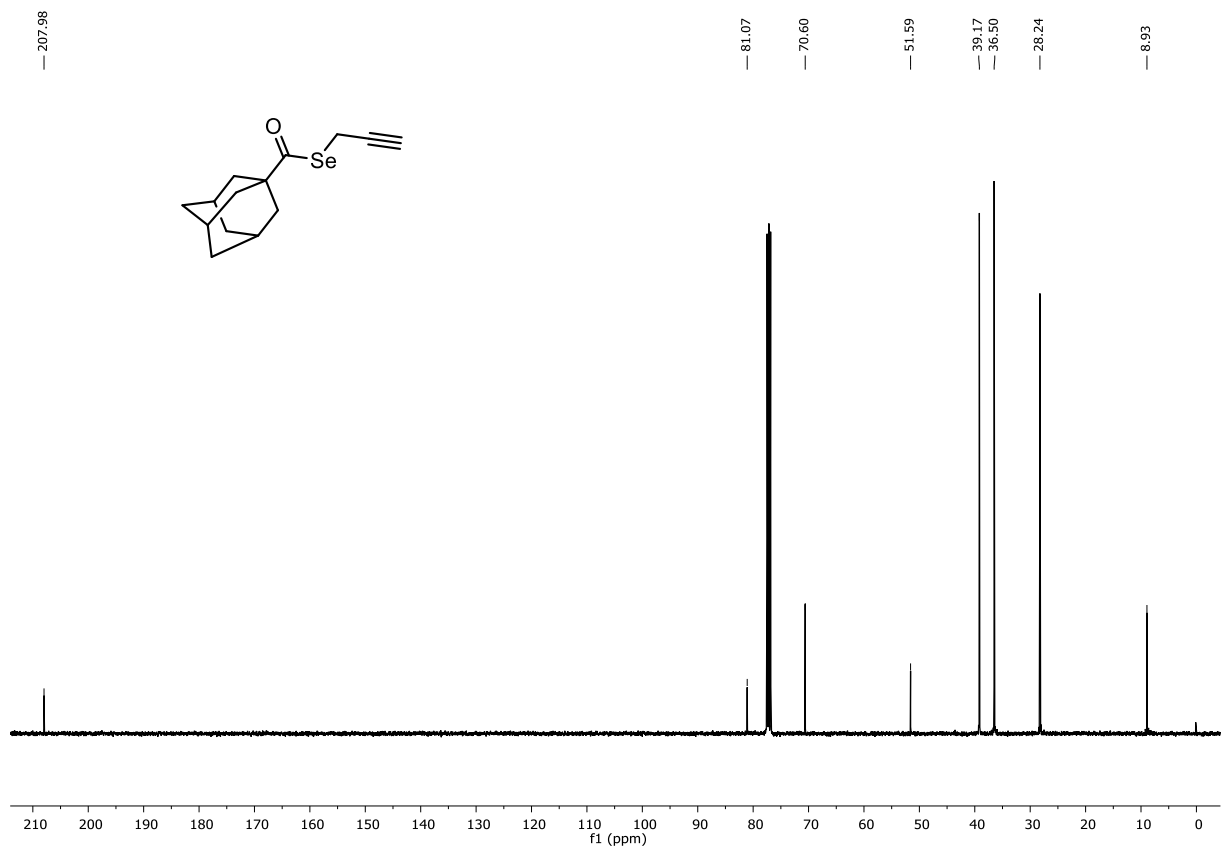

**Figure S63.**  $^{13}\text{C}$ -NMR spectrum of compound **1b**.

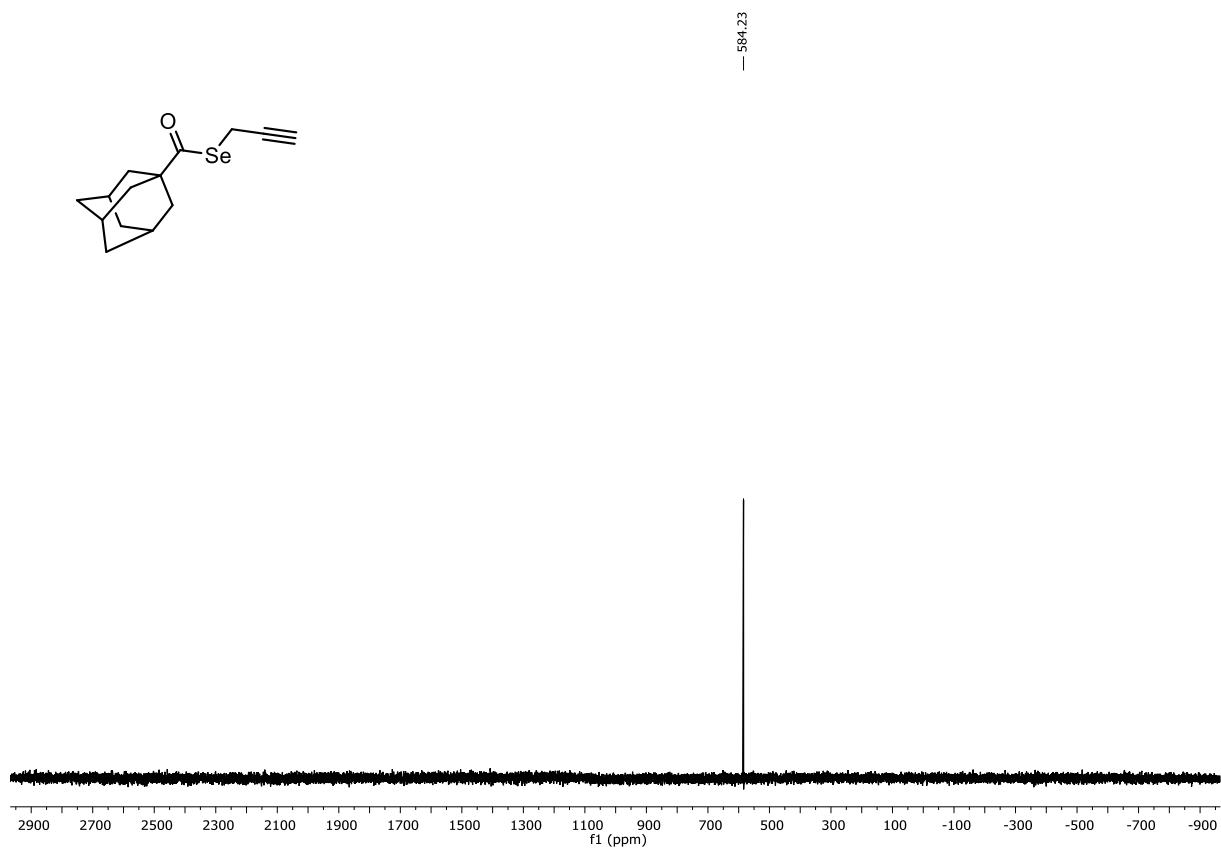

**Figure S64.**  $^{77}\text{Se}$ -NMR spectrum of compound **1b**.

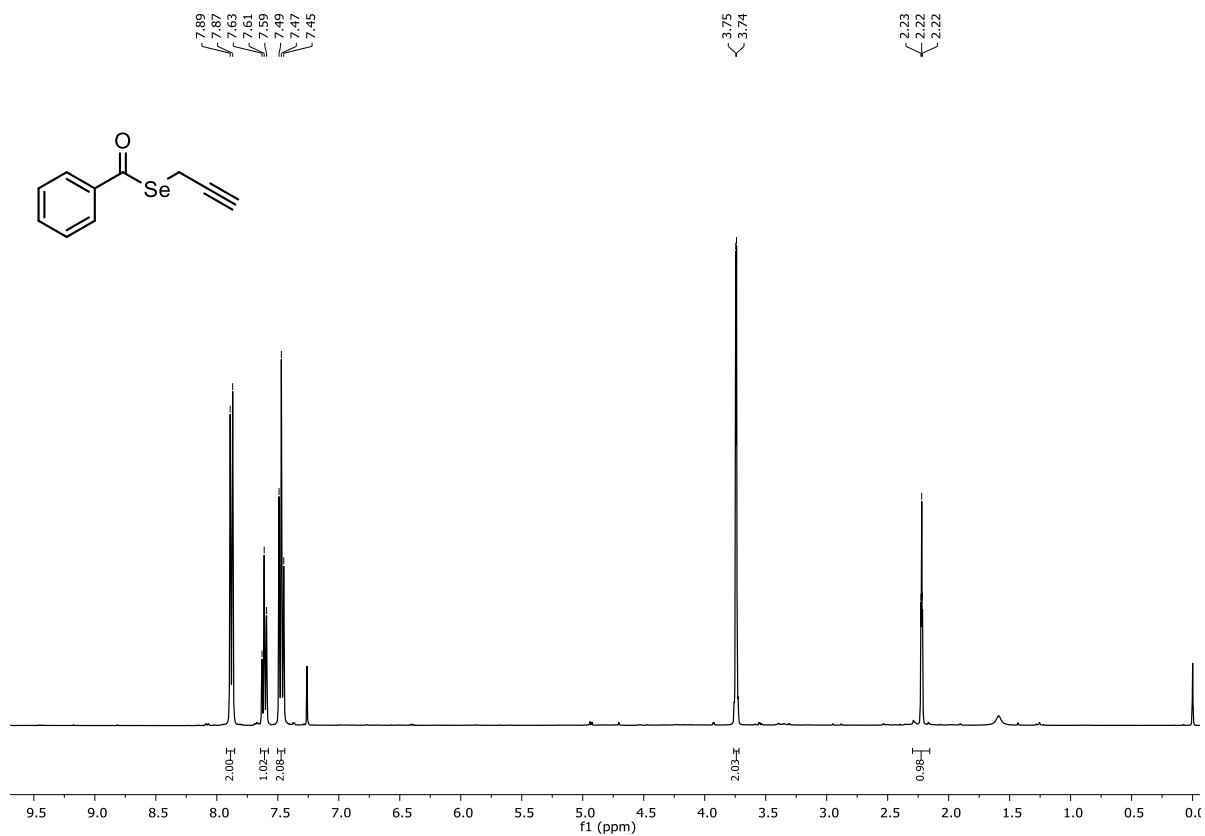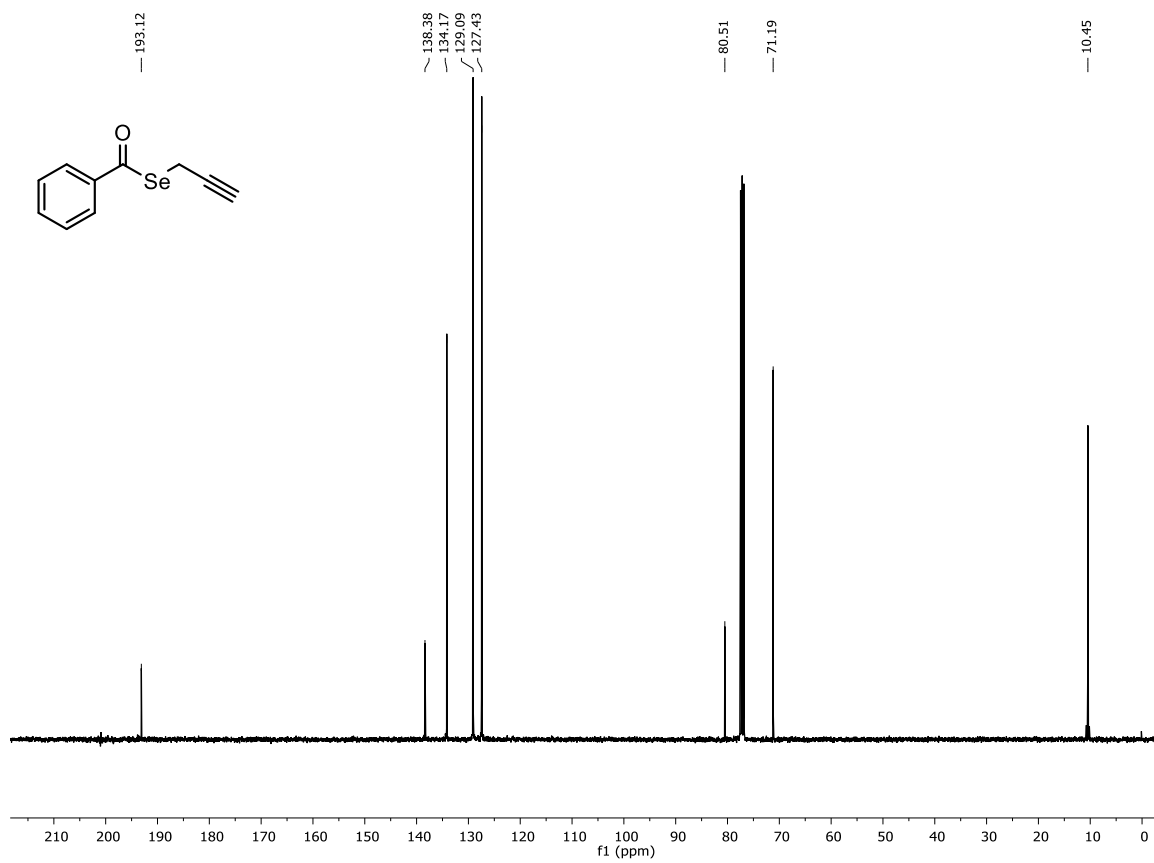

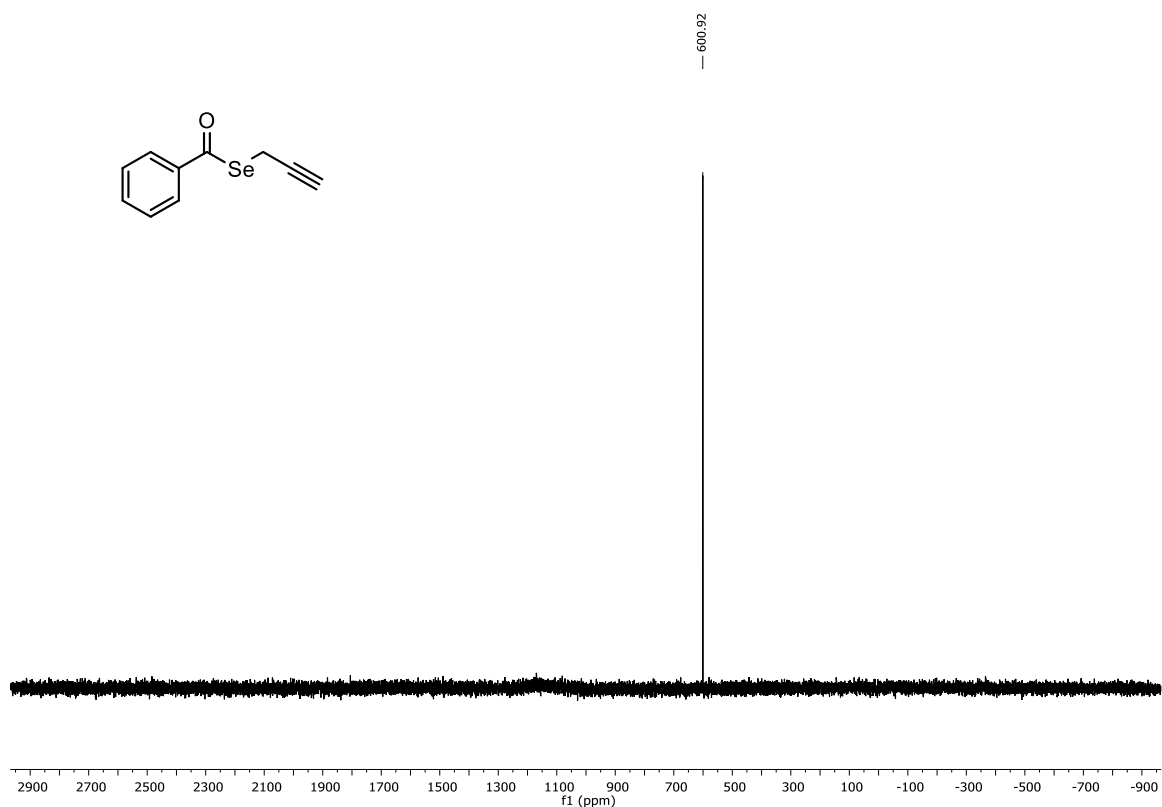

Figure S67. <sup>77</sup>Se-NMR spectrum of compound 2b.

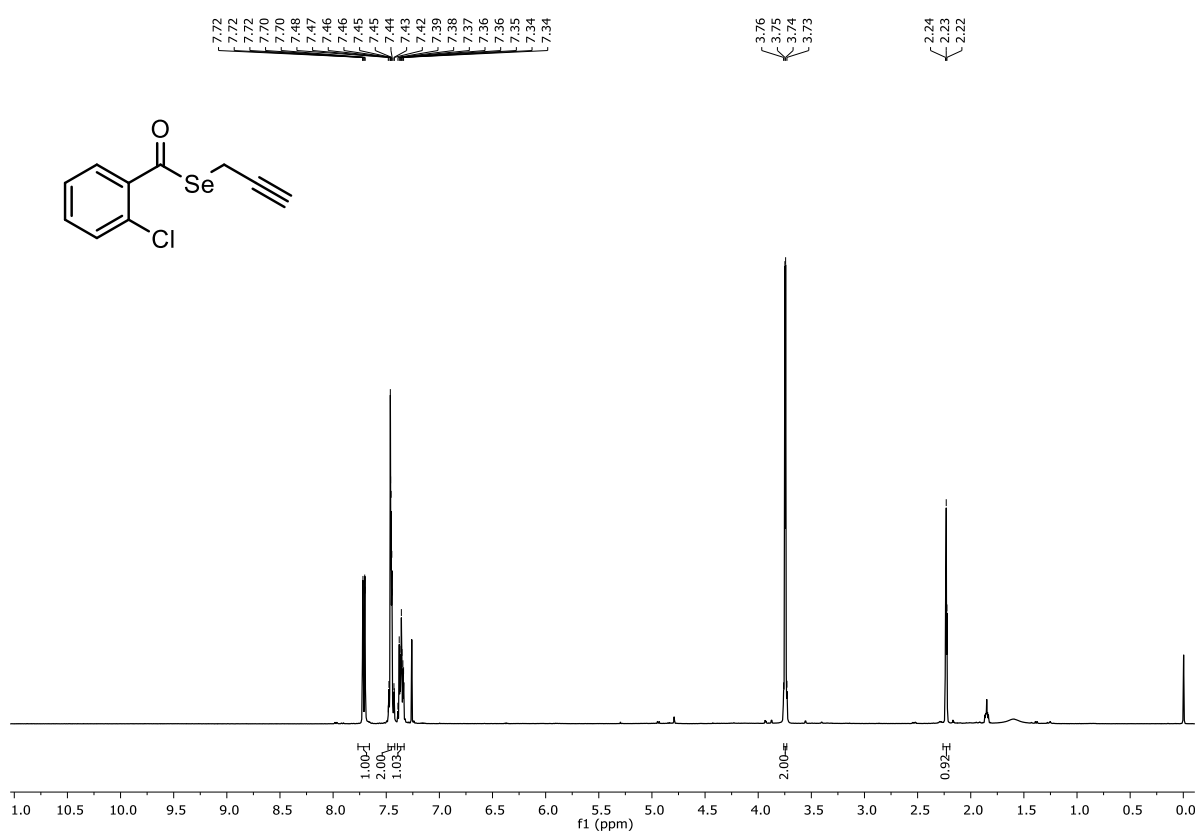

Figure S68. <sup>1</sup>H-NMR spectrum of compound 3b.

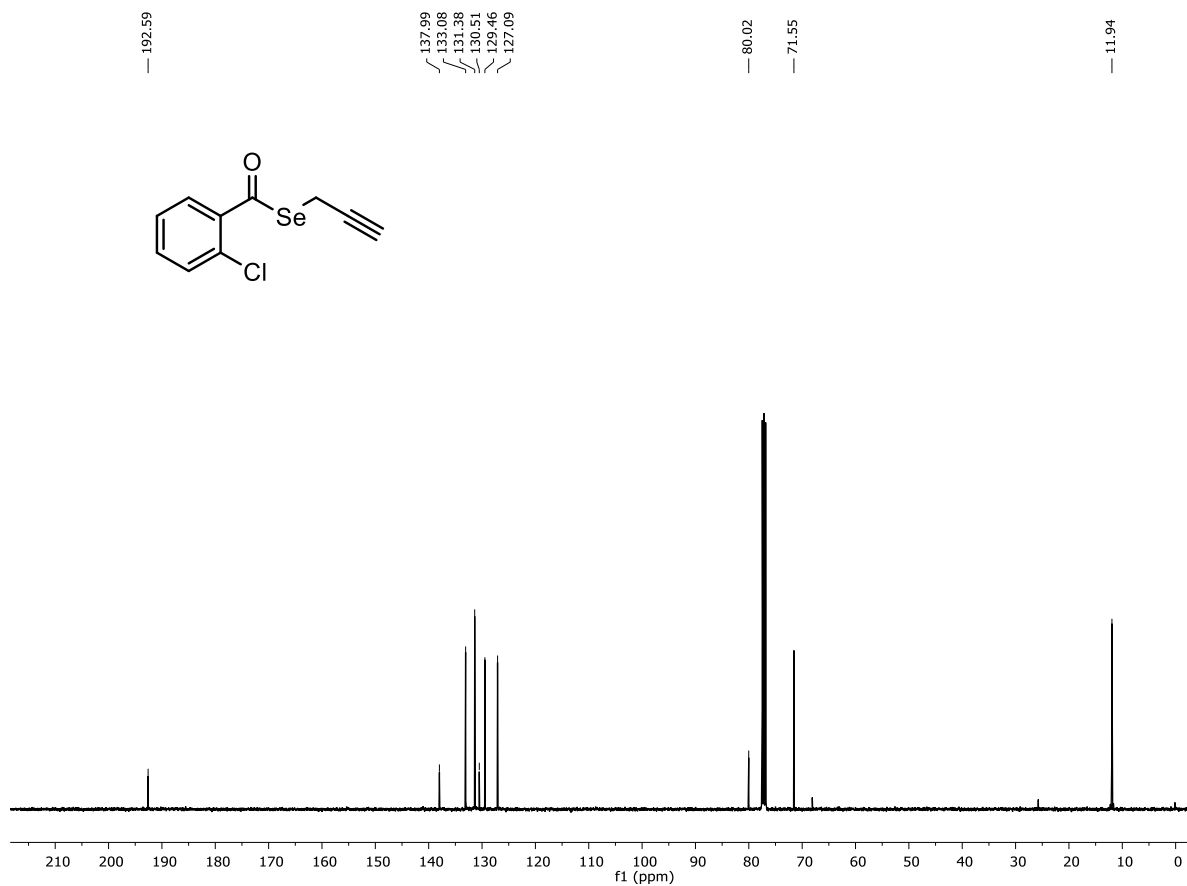

**Figure S69.** <sup>13</sup>C-NMR spectrum of compound **3b**.

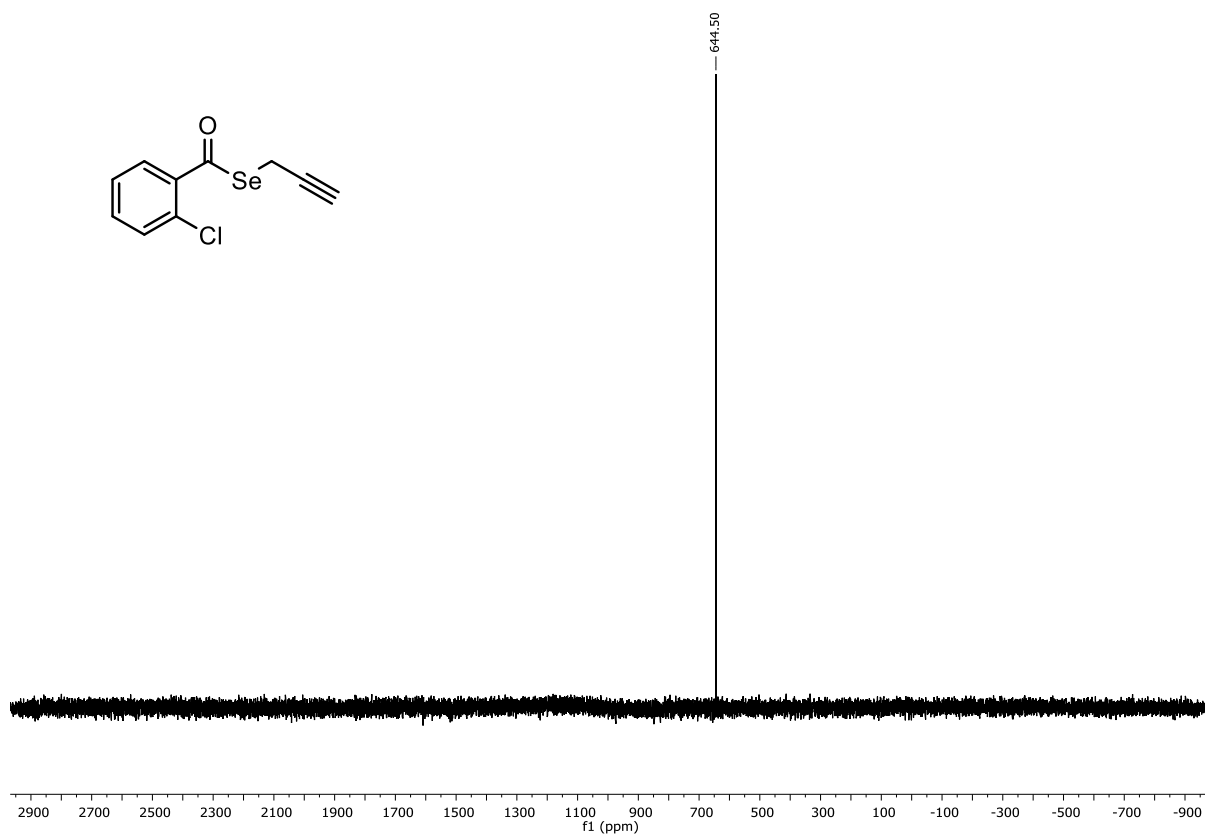

**Figure S70.** <sup>77</sup>Se-NMR spectrum of compound **3b**.

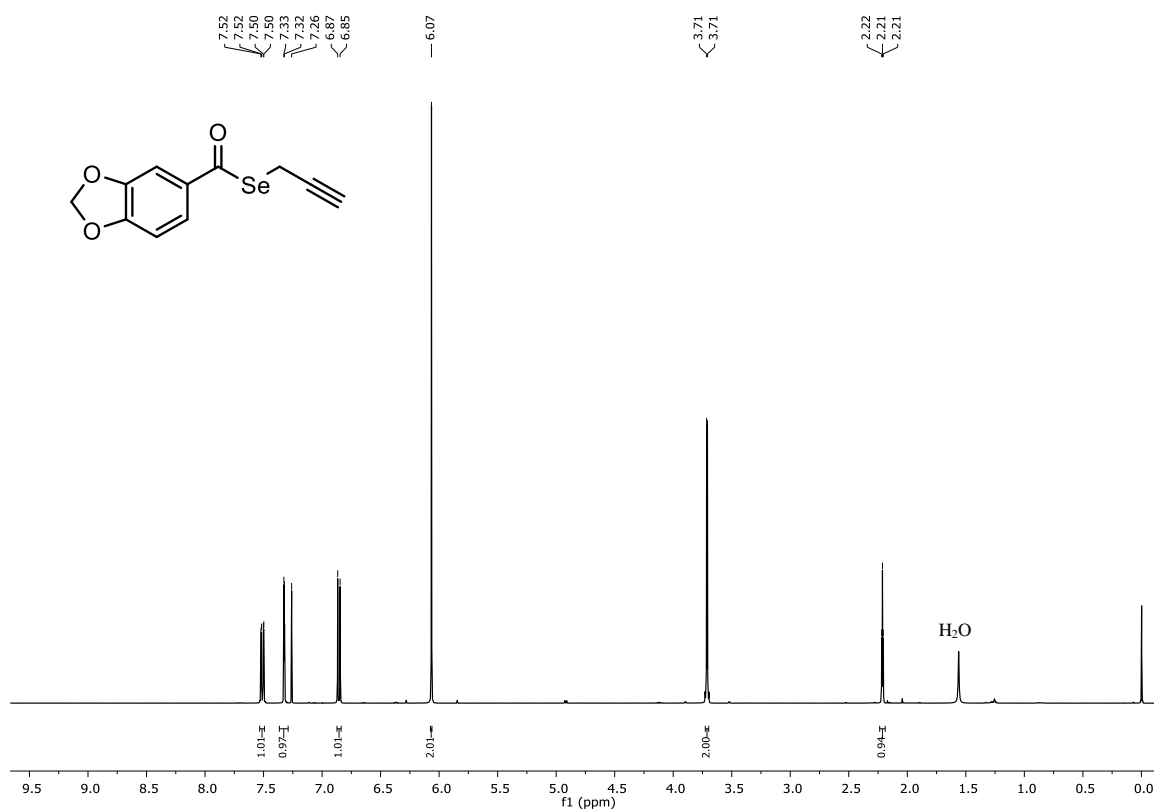

**Figure S71.** <sup>1</sup>H-NMR spectrum of compound **4b**.

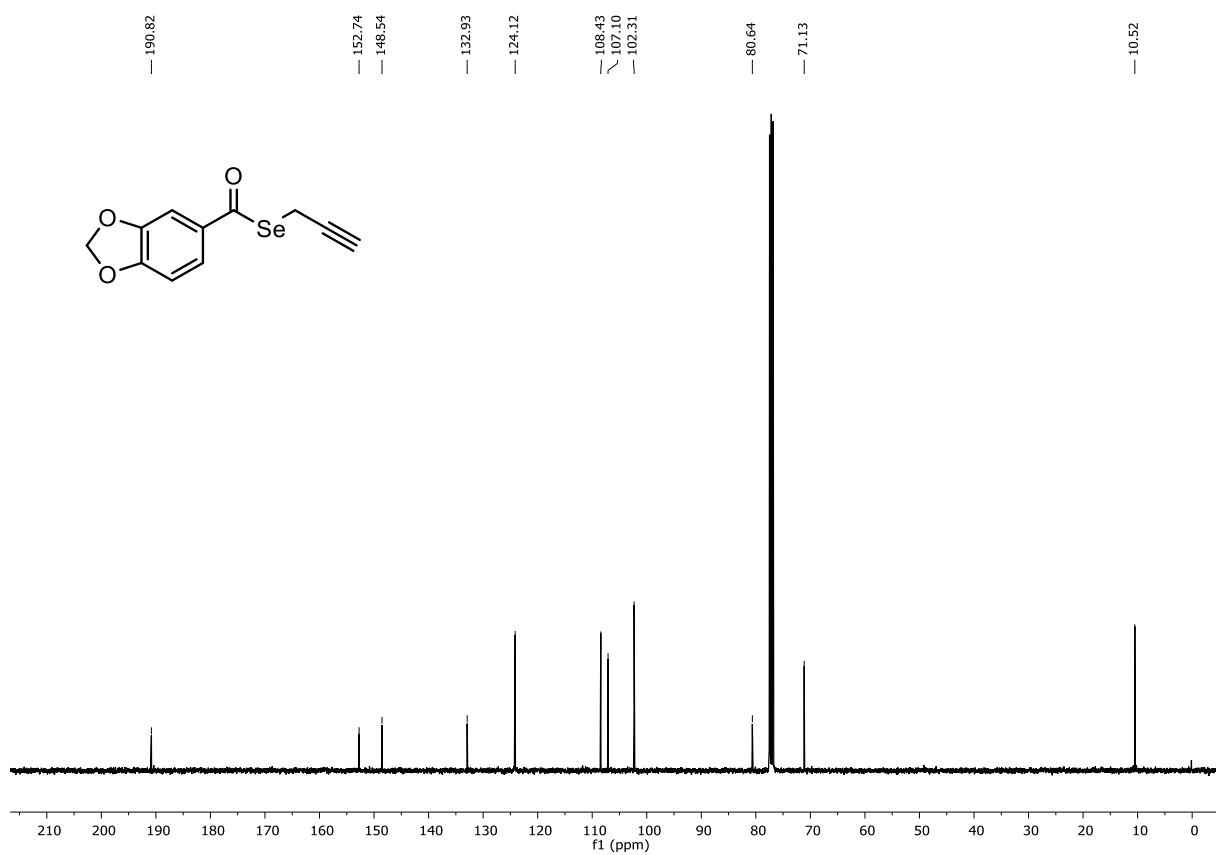

**Figure S72.** <sup>13</sup>C-NMR spectrum of compound **4b**.

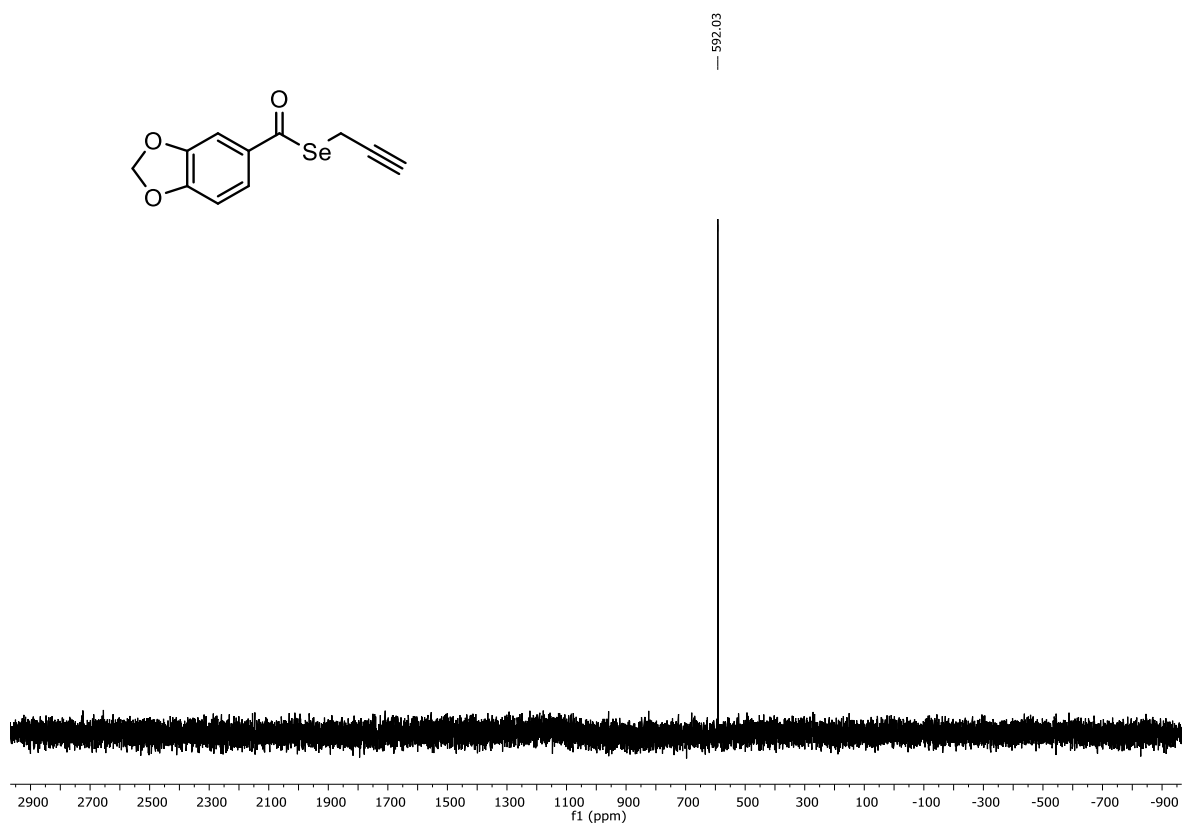

Figure S73. <sup>77</sup>Se-NMR spectrum of compound 4b.

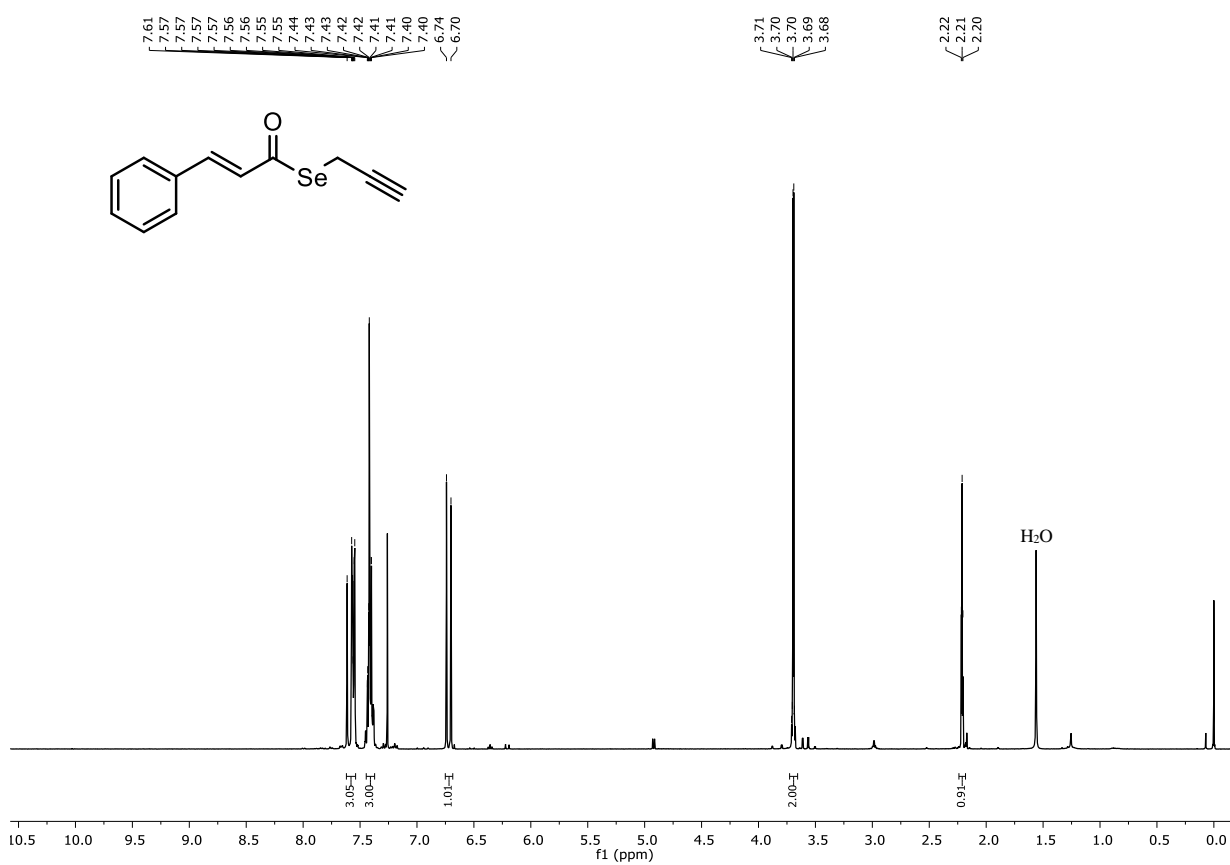

Figure S74. <sup>1</sup>H-NMR spectrum of compound 5b.

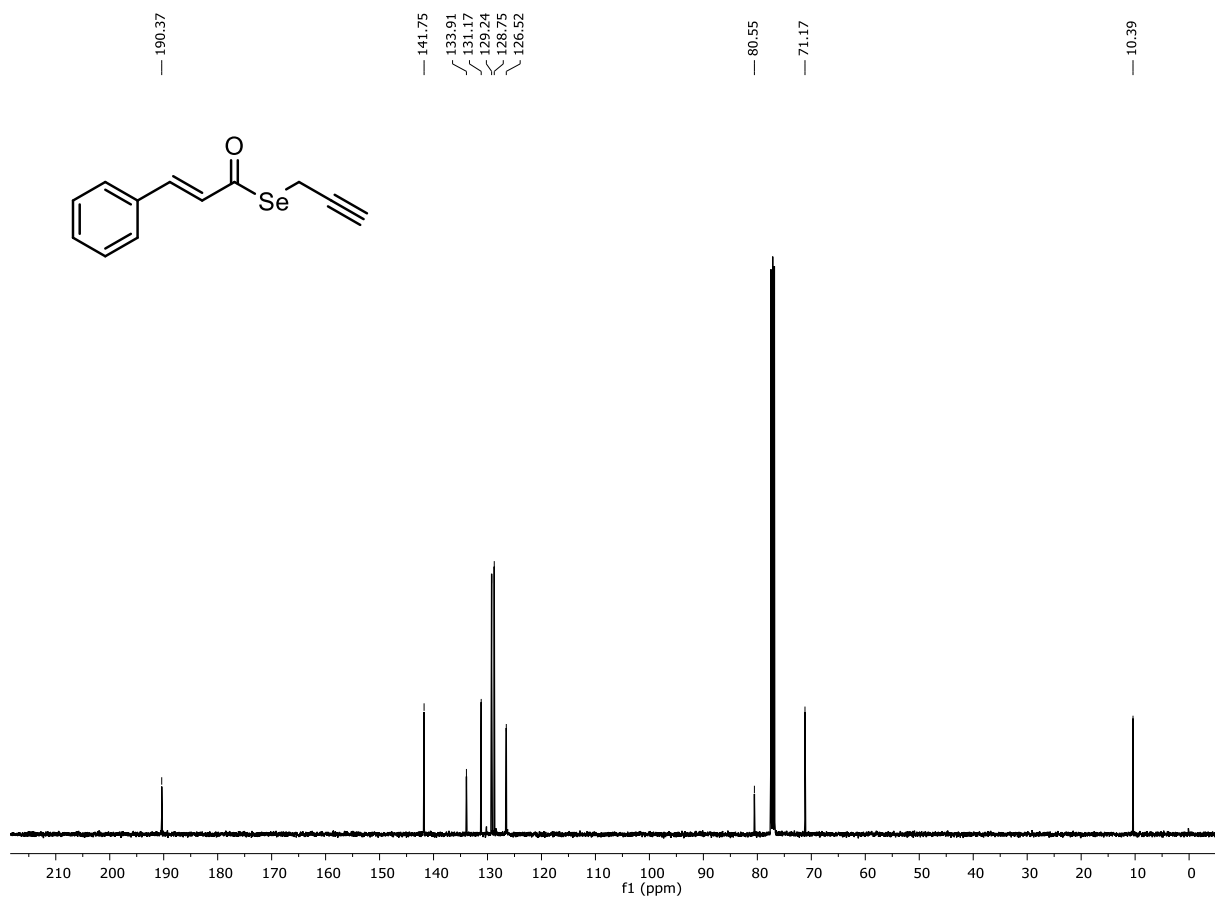

**Figure S75.** <sup>13</sup>C-NMR spectrum of compound **5b**.

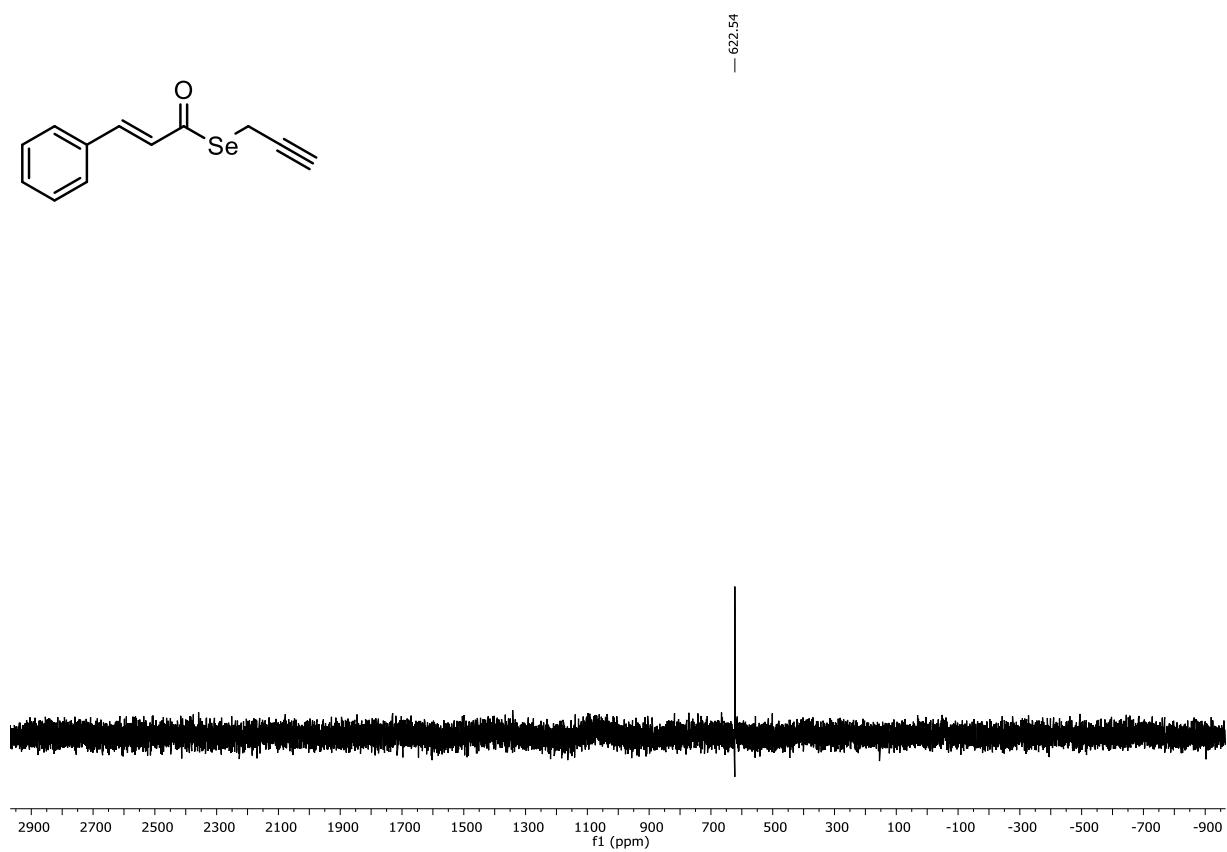

**Figure S76.** <sup>77</sup>Se-NMR spectrum of compound **5b**.

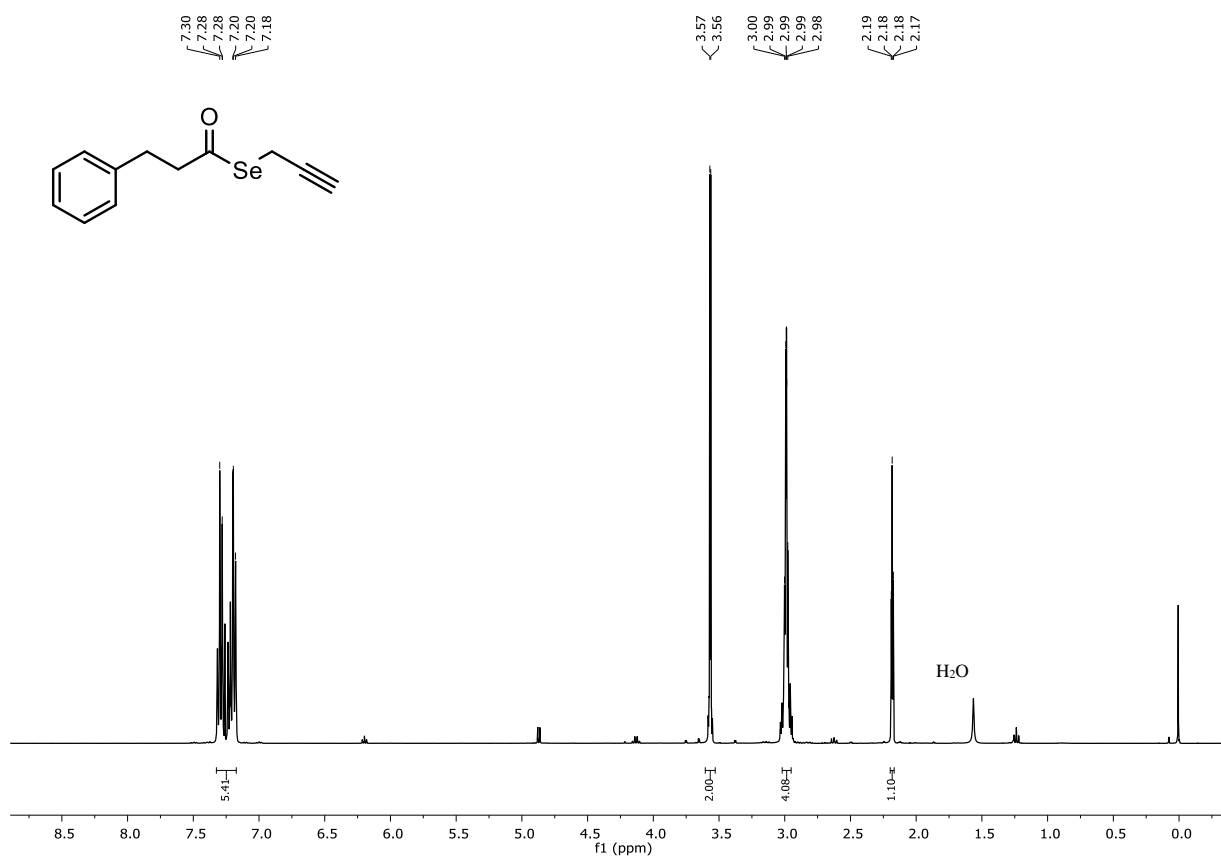

**Figure S77.** <sup>1</sup>H-NMR spectrum of compound **6b**.

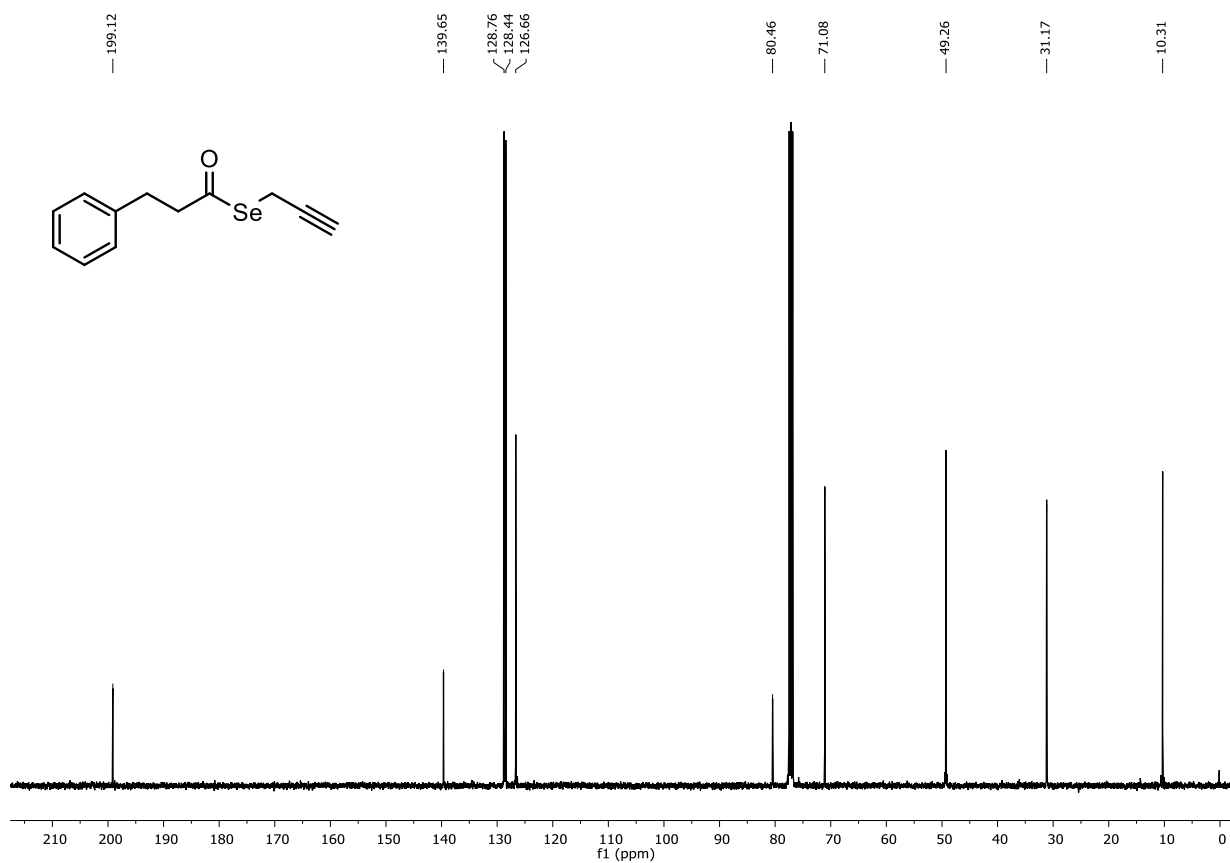

**Figure S78.** <sup>13</sup>C-NMR spectrum of compound **6b**.



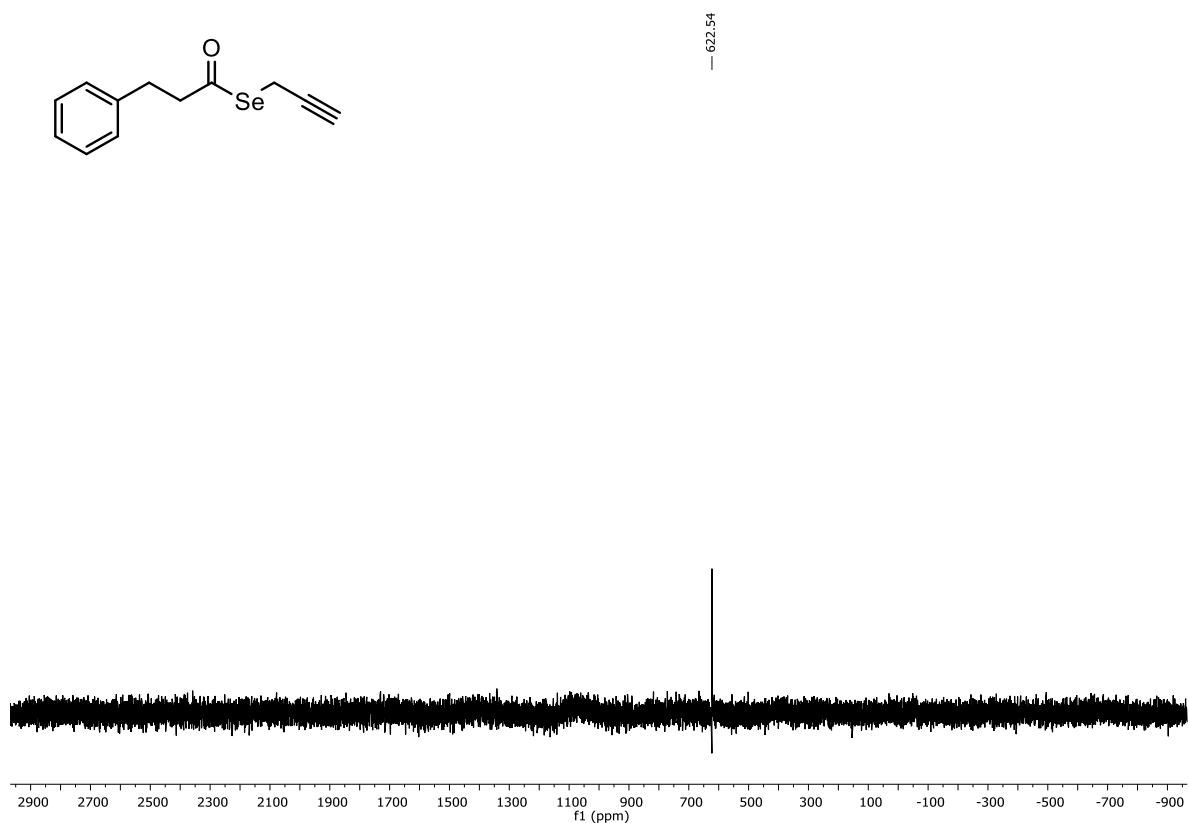

Figure S79. <sup>77</sup>Se-NMR spectrum of compound **6b**.

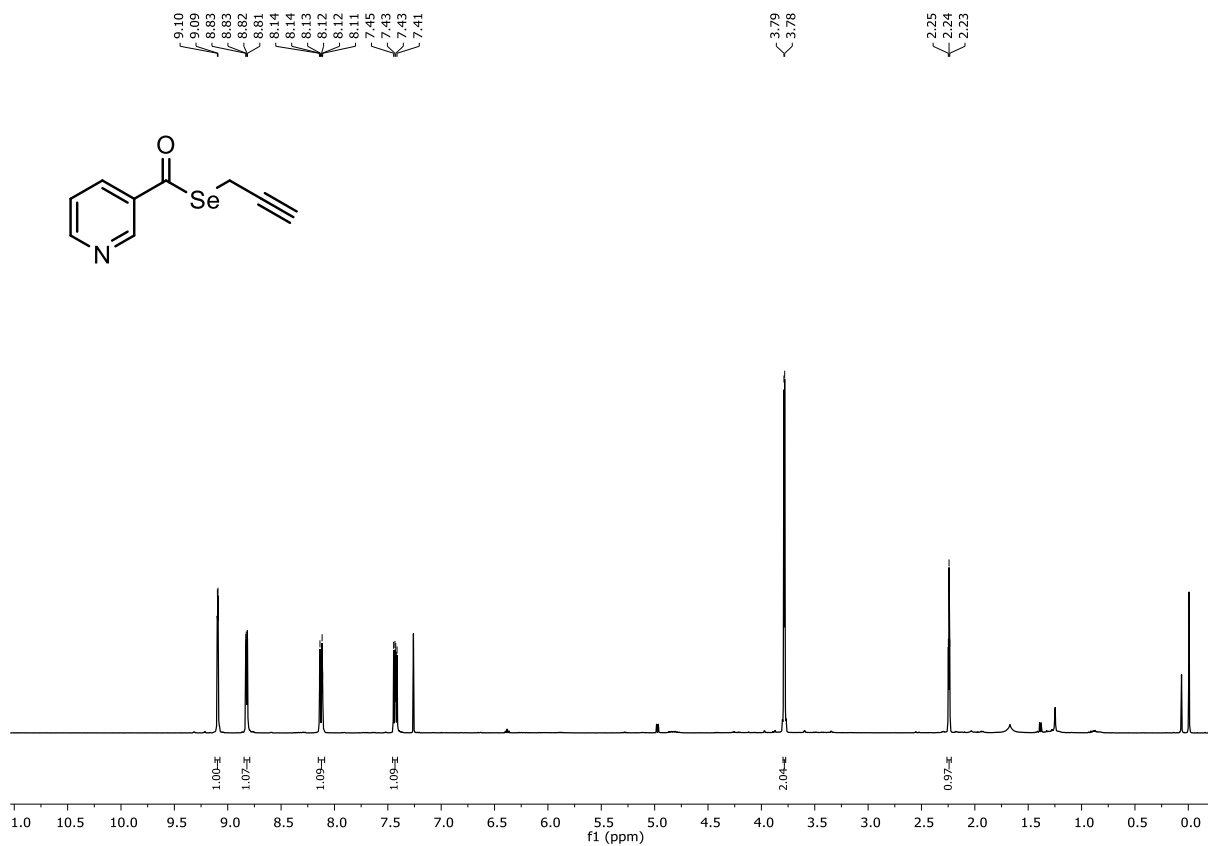

Figure S80. <sup>1</sup>H-NMR spectrum of compound **7b**.

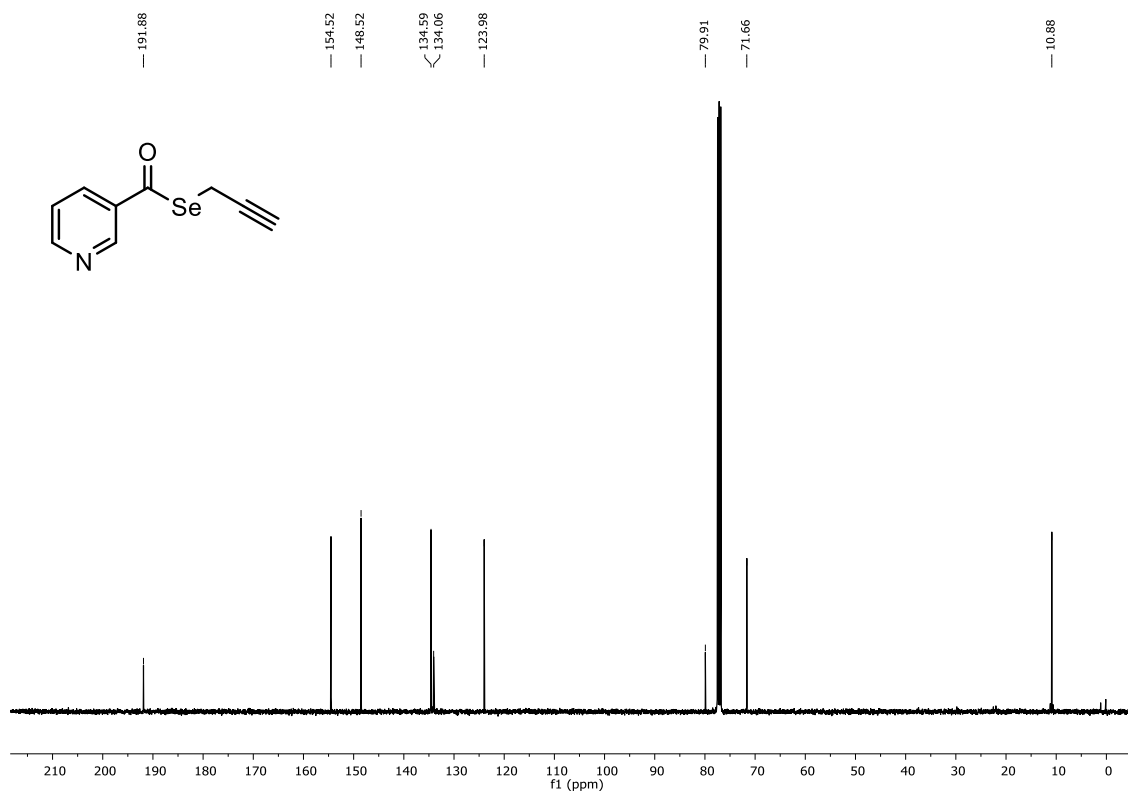

Figure S81. <sup>13</sup>C-NMR spectrum of compound **7b**.

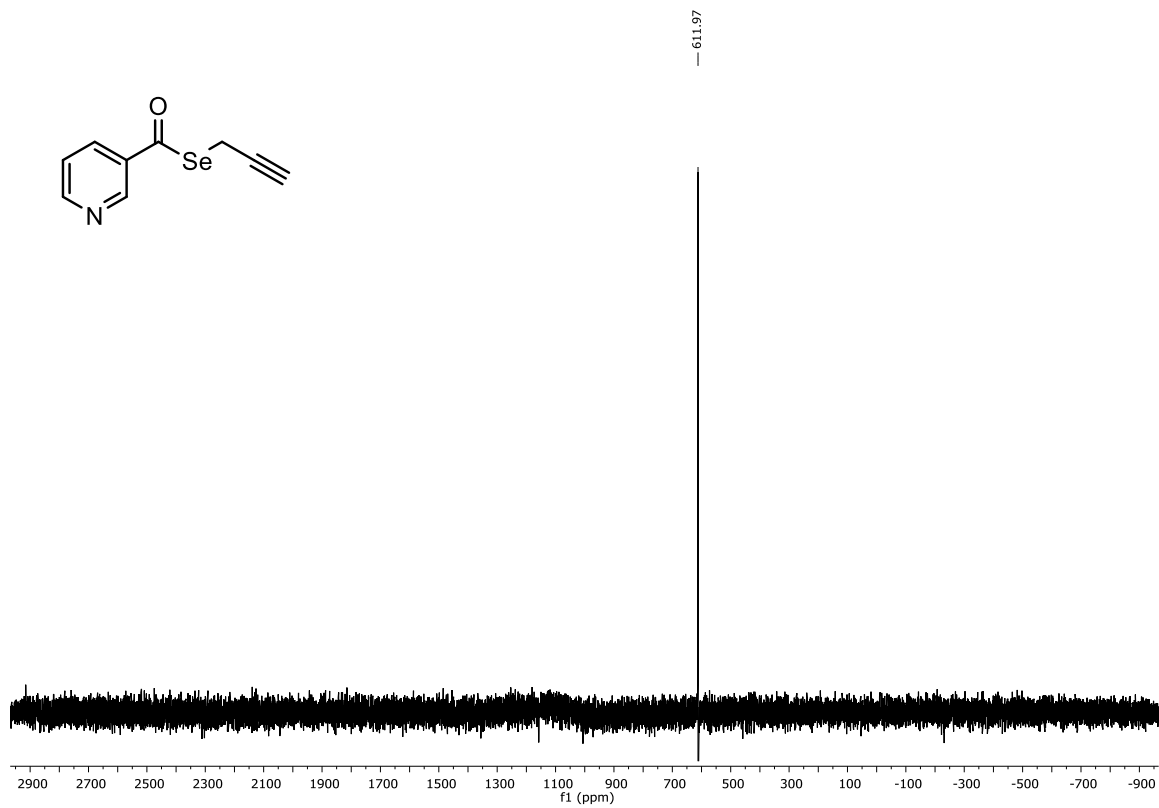

Figure S82. <sup>77</sup>Se-NMR spectrum of compound **7b**.

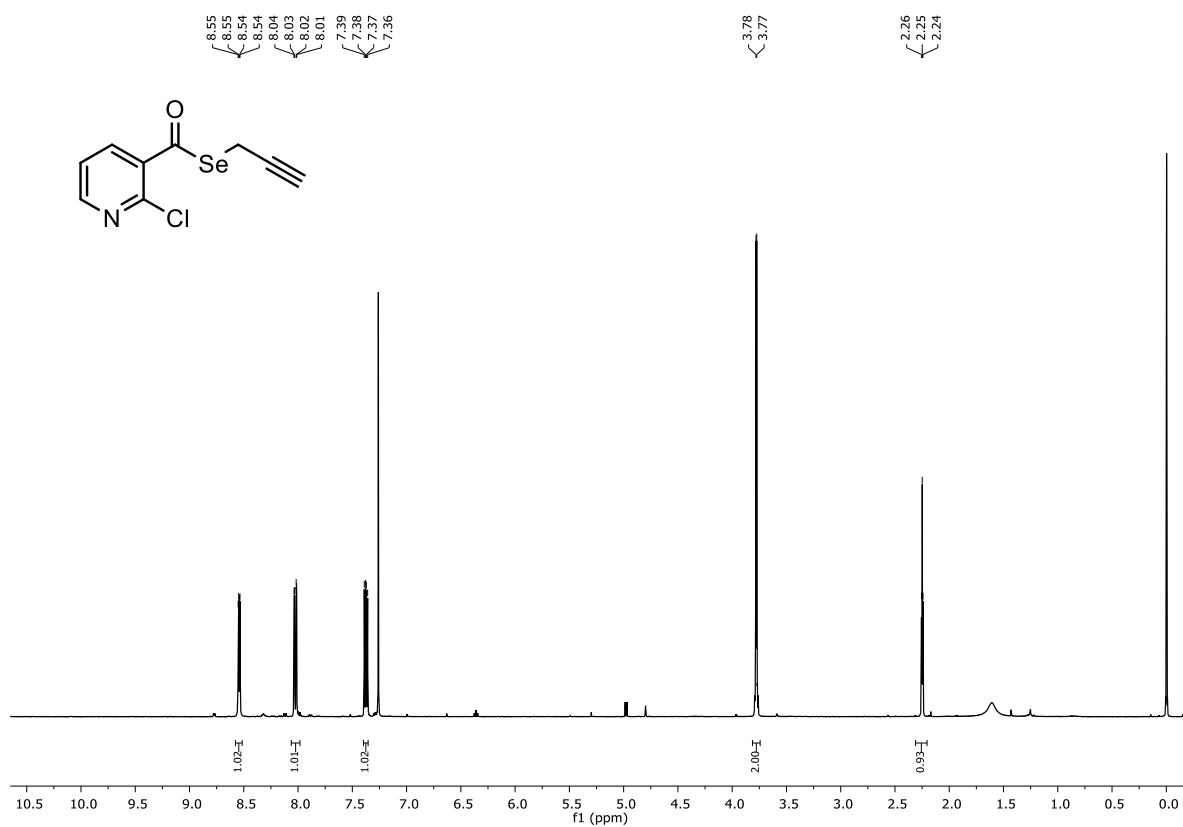

Figure S83. <sup>1</sup>H-NMR spectrum of compound **8b**.

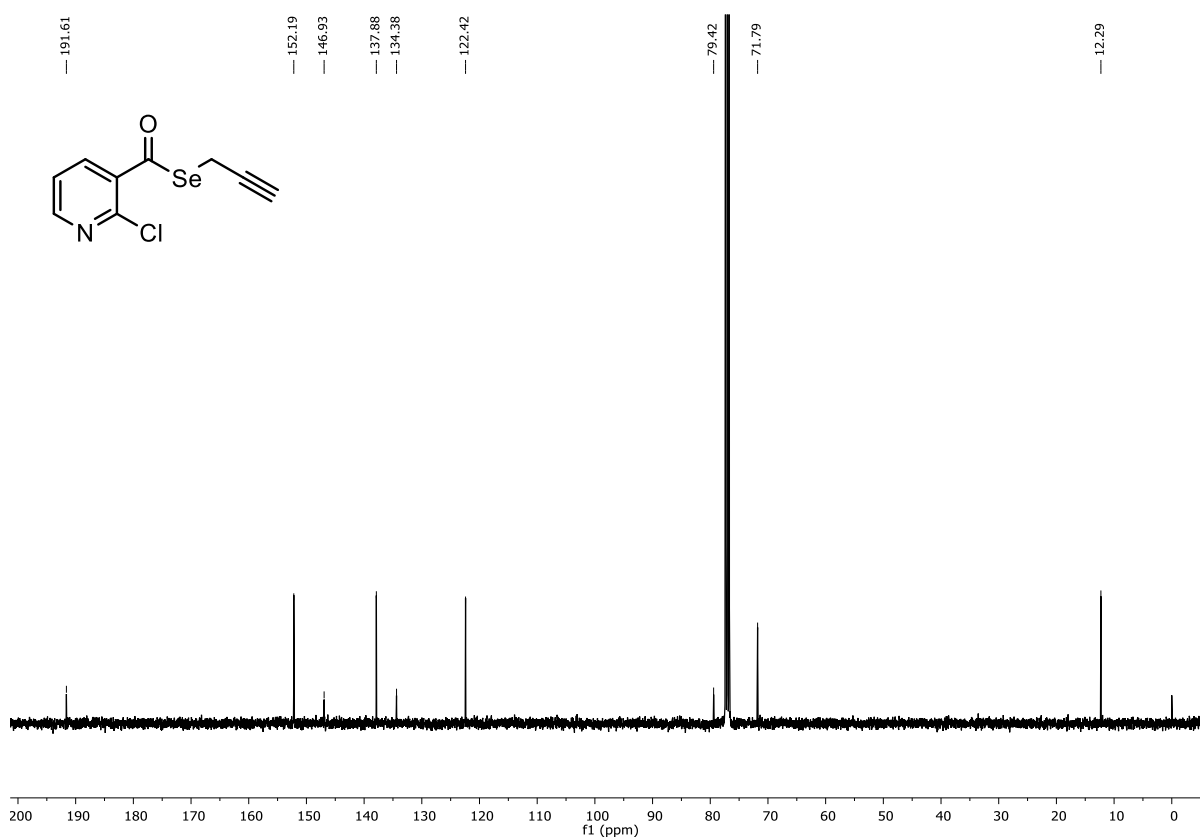

Figure S84. <sup>13</sup>C-NMR spectrum of compound **8b**.

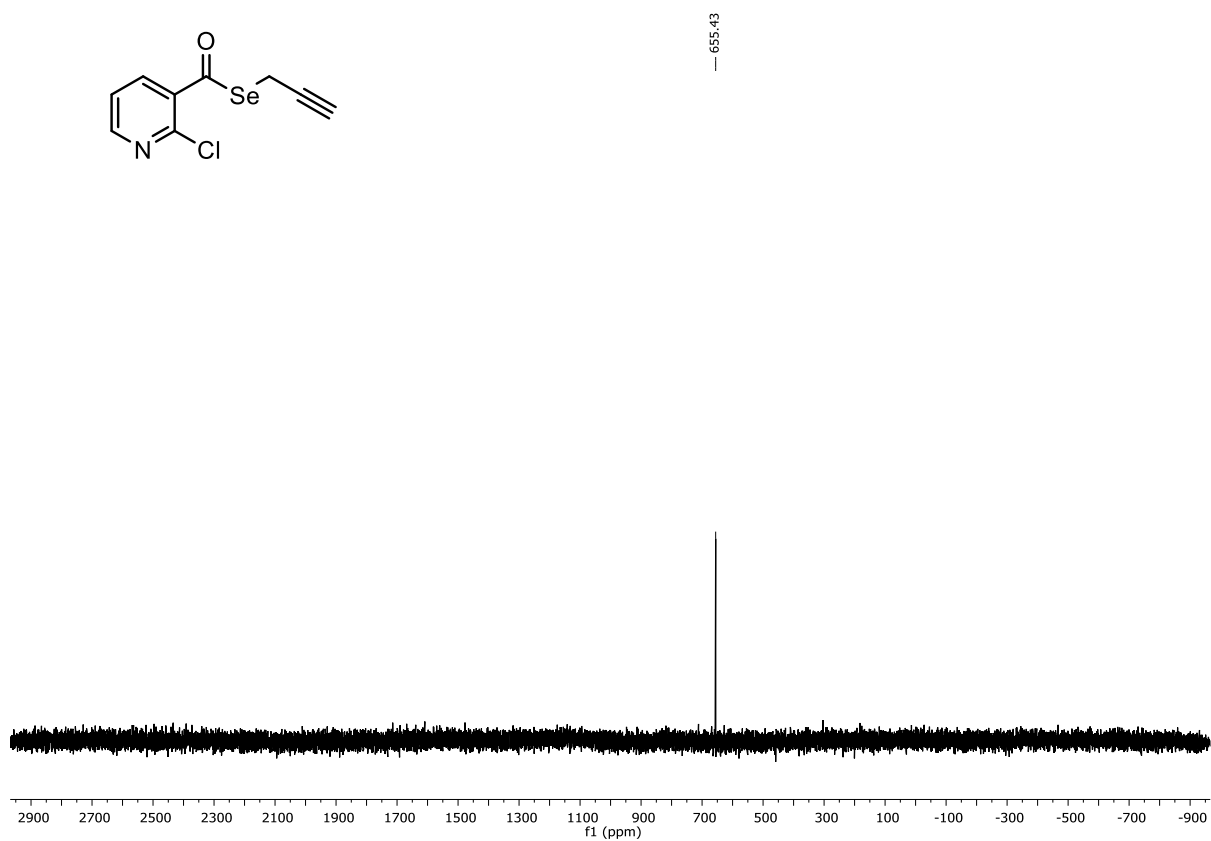

Figure S85.  $^{77}\text{Se}$ -NMR spectrum of compound **8b**.

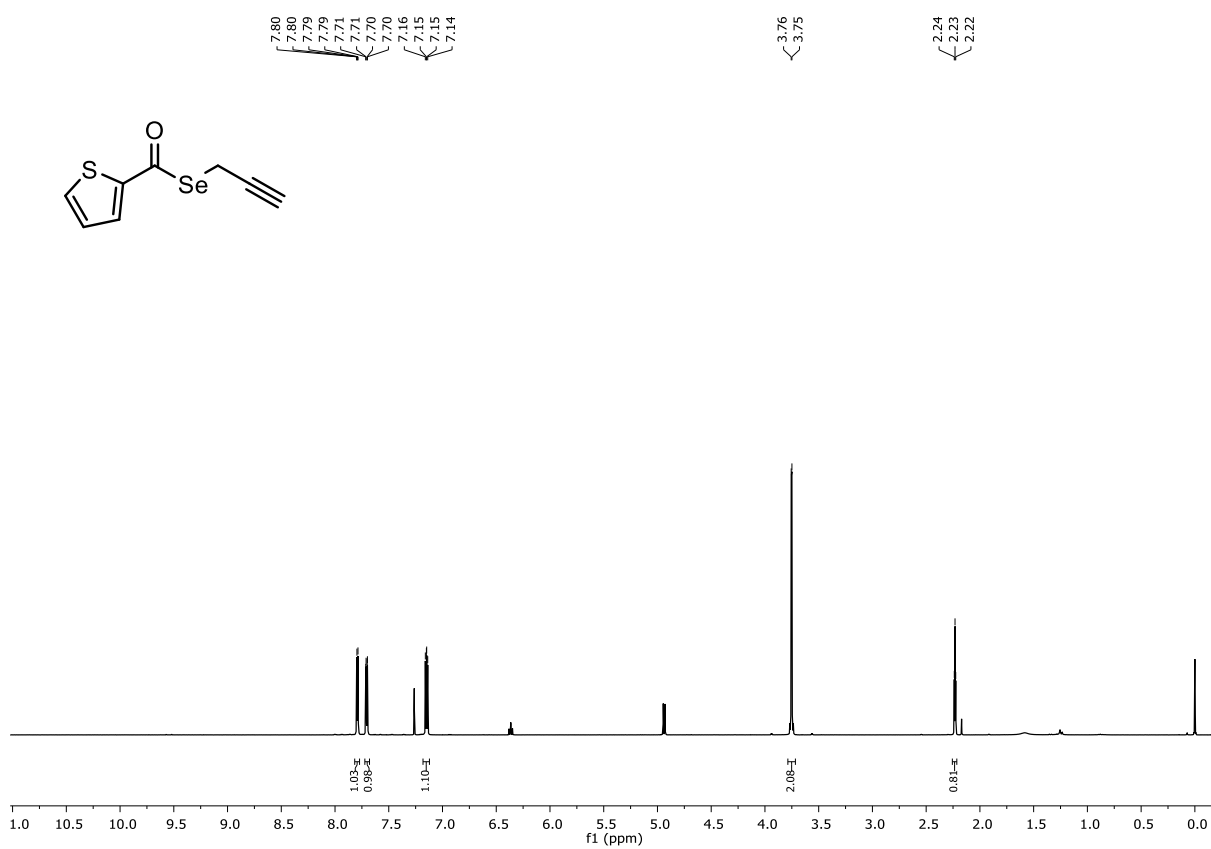

Figure S86.  $^1\text{H}$ -NMR spectrum of compound **9b**.

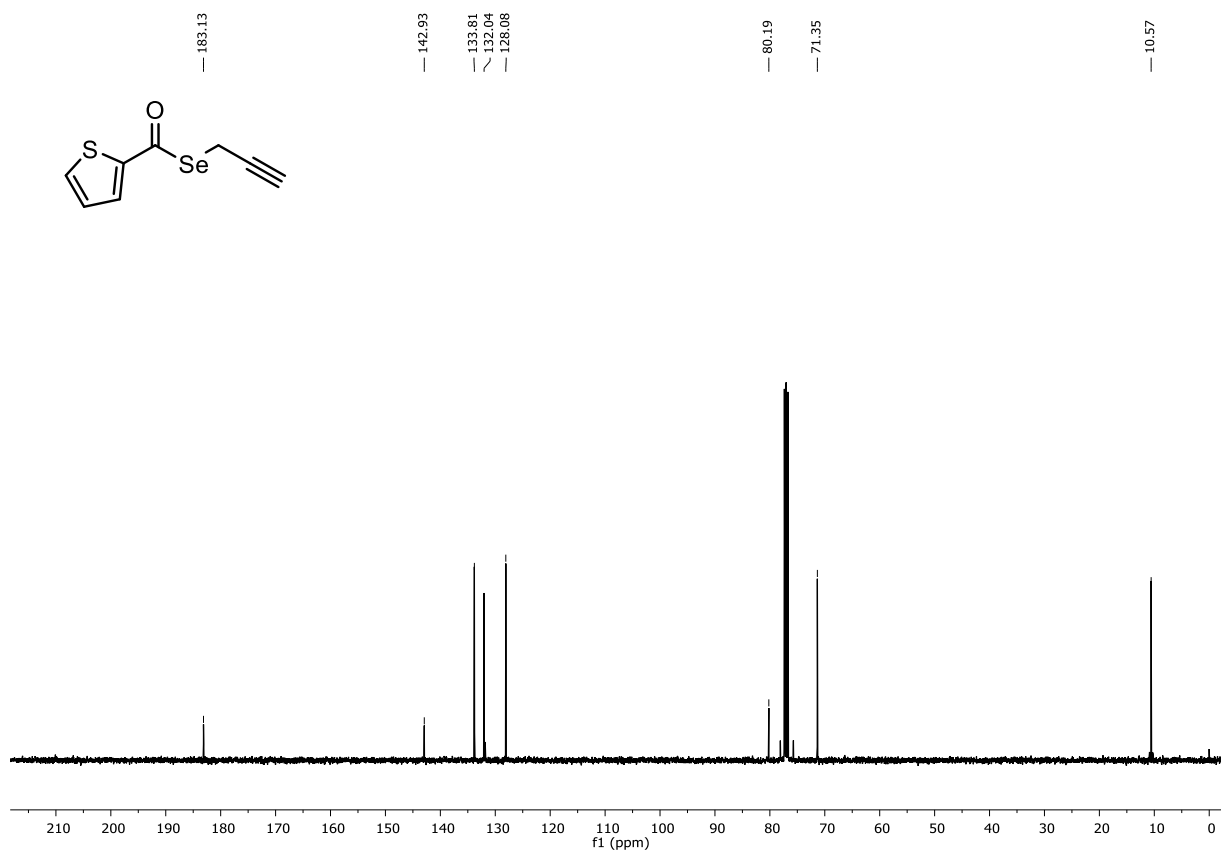

Figure S87. <sup>13</sup>C-NMR spectrum of compound **9b**.

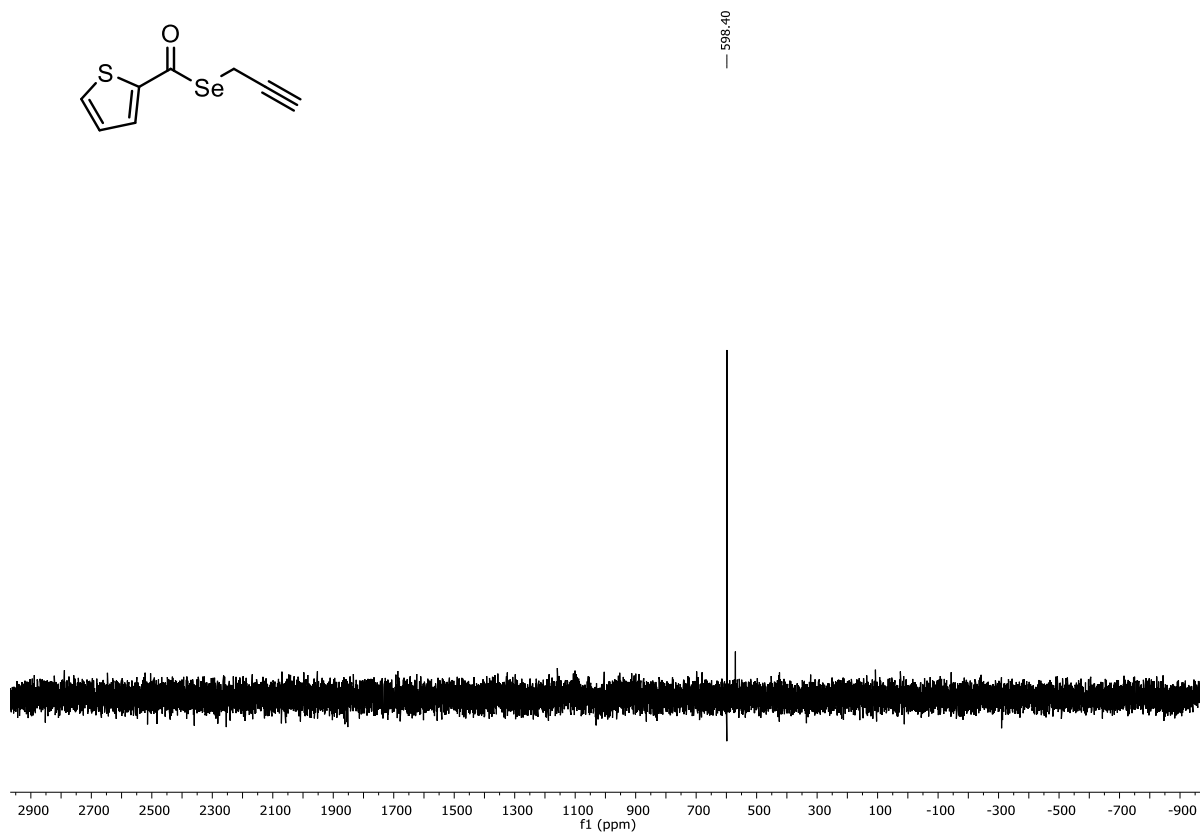

Figure S88. <sup>77</sup>Se-NMR spectrum of compound **9b**.

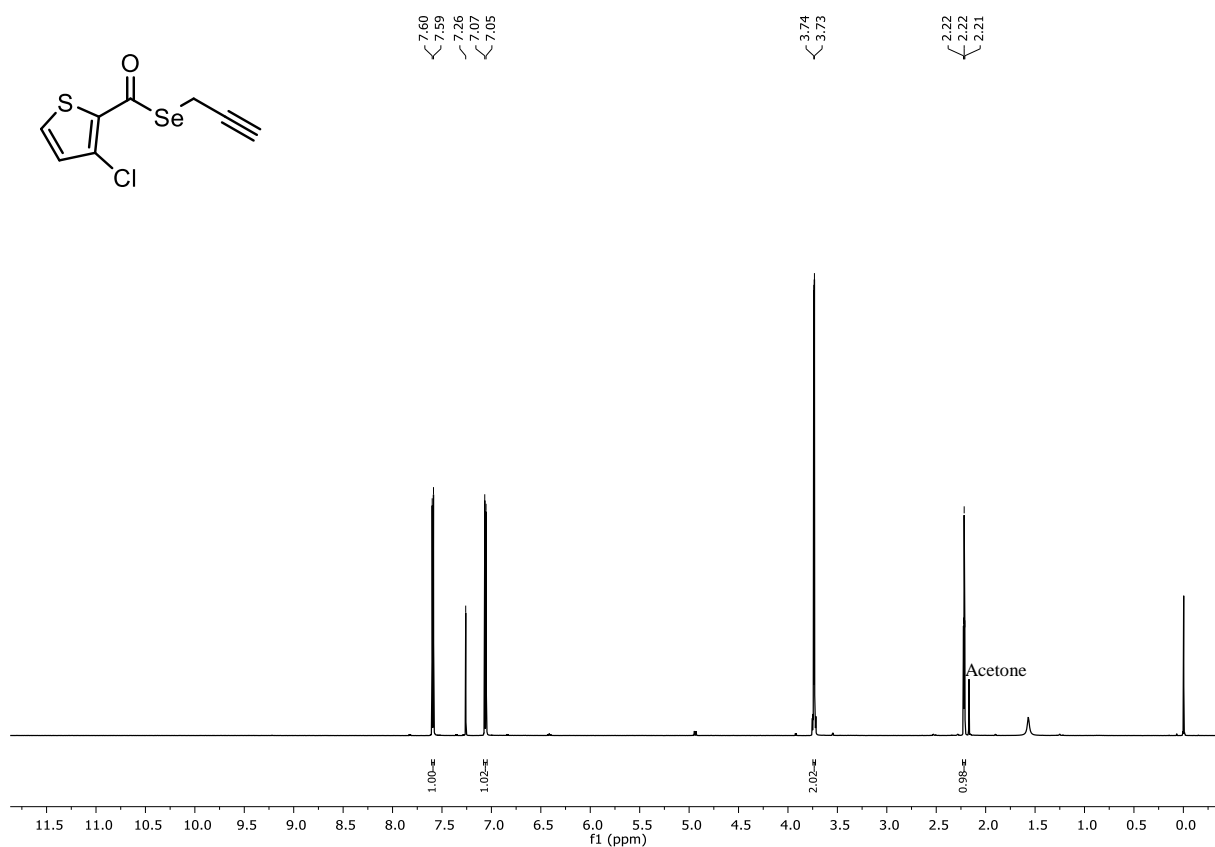

**Figure S89.** <sup>1</sup>H-NMR spectrum of compound **10b**.

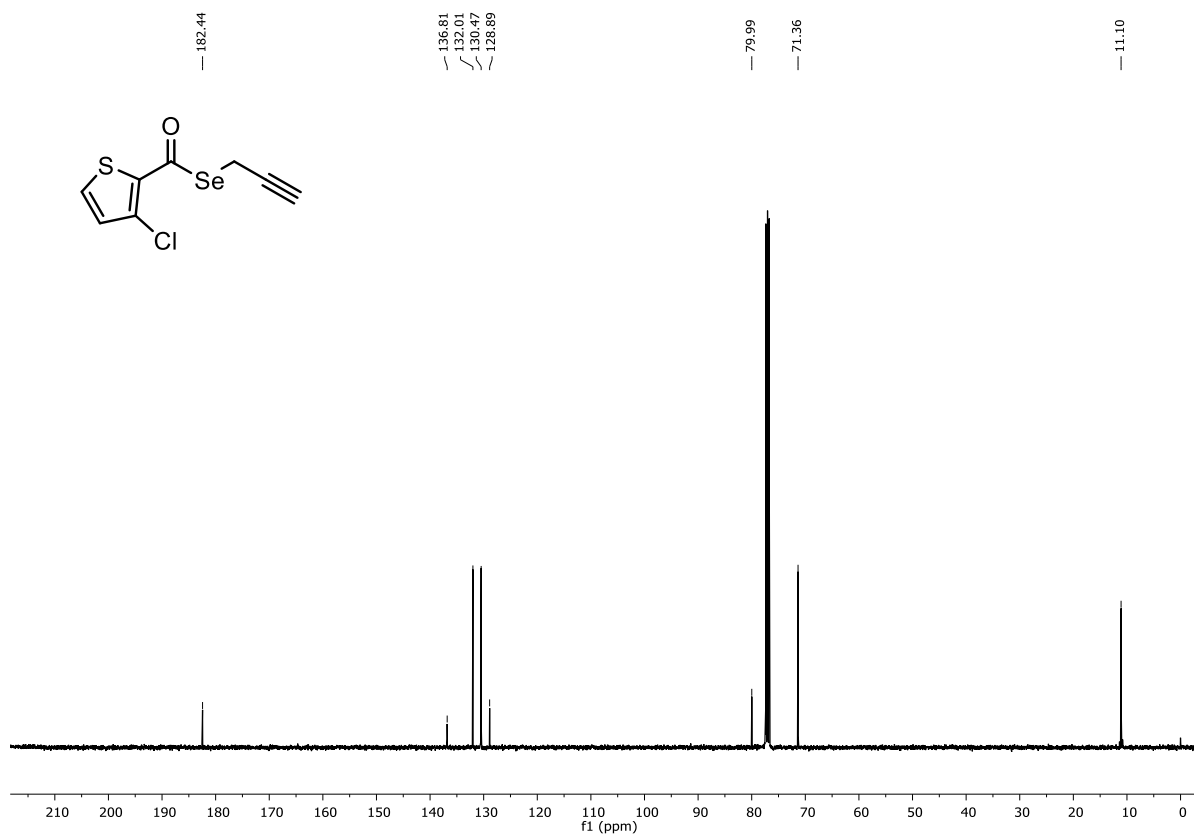

**Figure S90.** <sup>13</sup>C-NMR spectrum of compound **10b**.

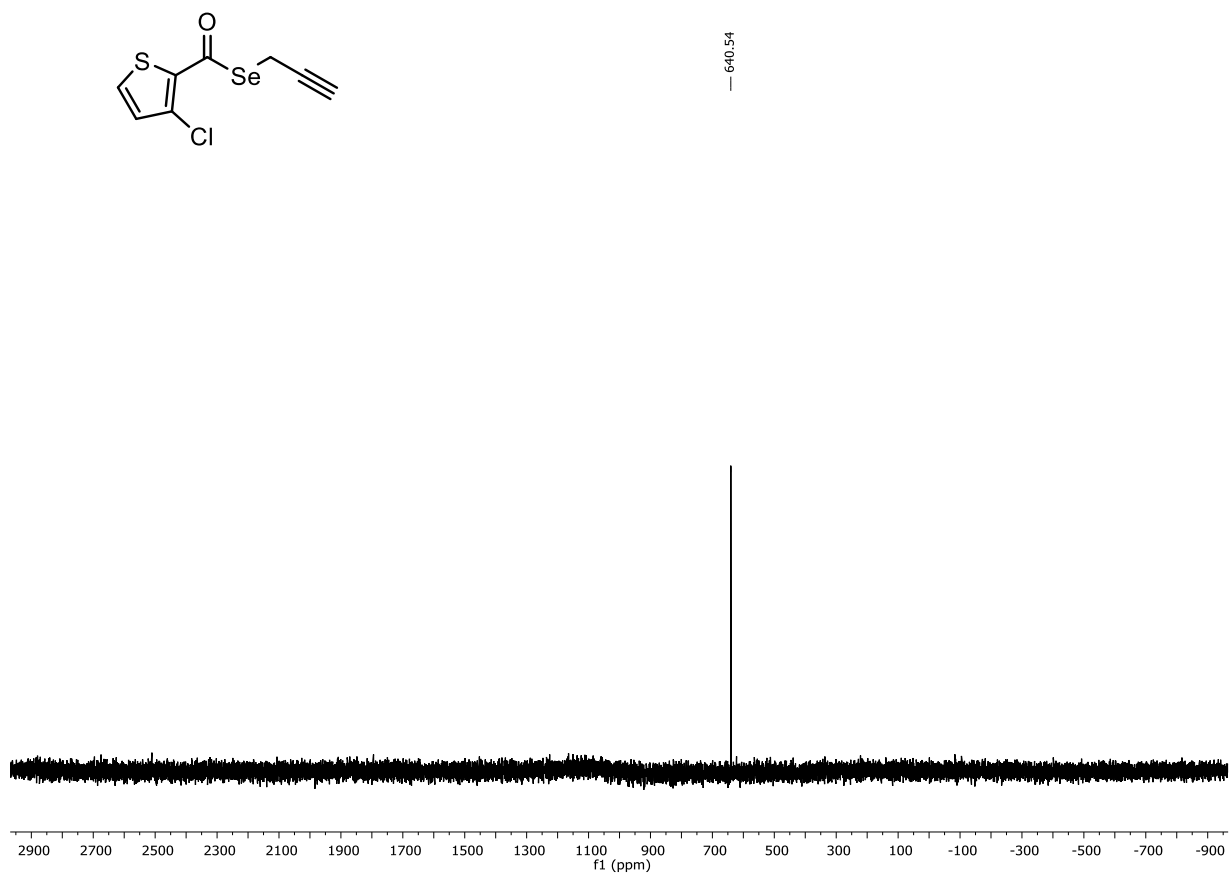

**Figure S91.**  $^{77}\text{Se}$ -NMR spectrum of compound **10b**.

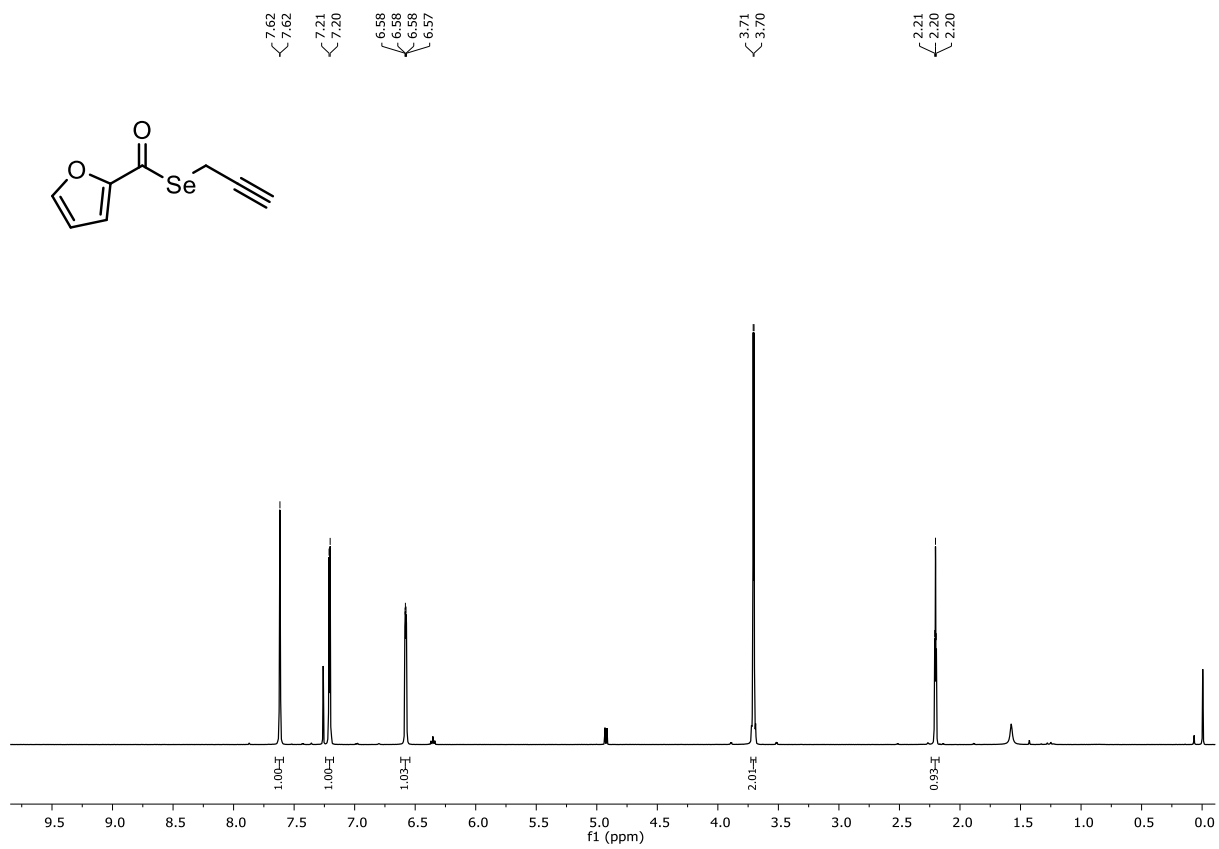

**Figure S92.**  $^1\text{H}$ -NMR spectrum of compound **11b**.

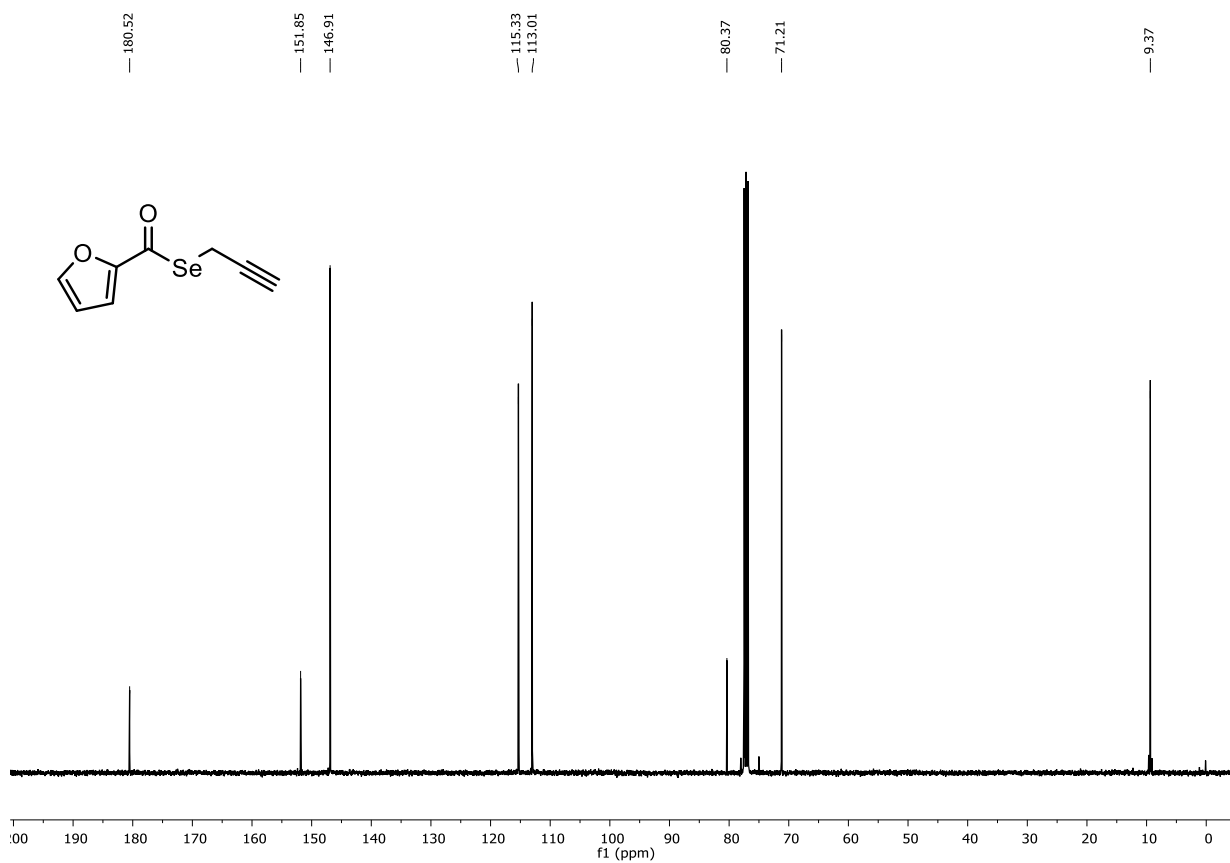

**Figure S93.** <sup>13</sup>C-NMR spectrum of compound **11b**.

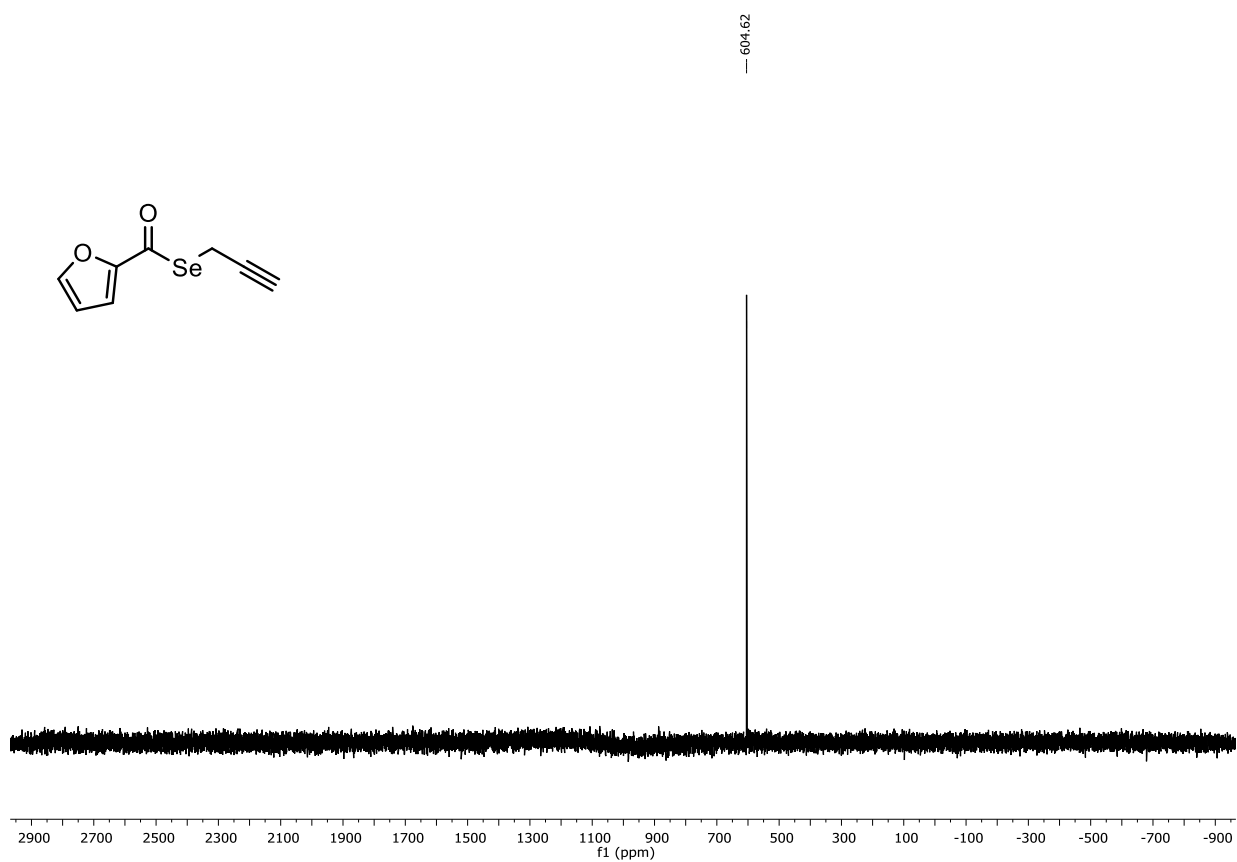

**Figure S94.** <sup>77</sup>Se-NMR spectrum of compound **11b**.



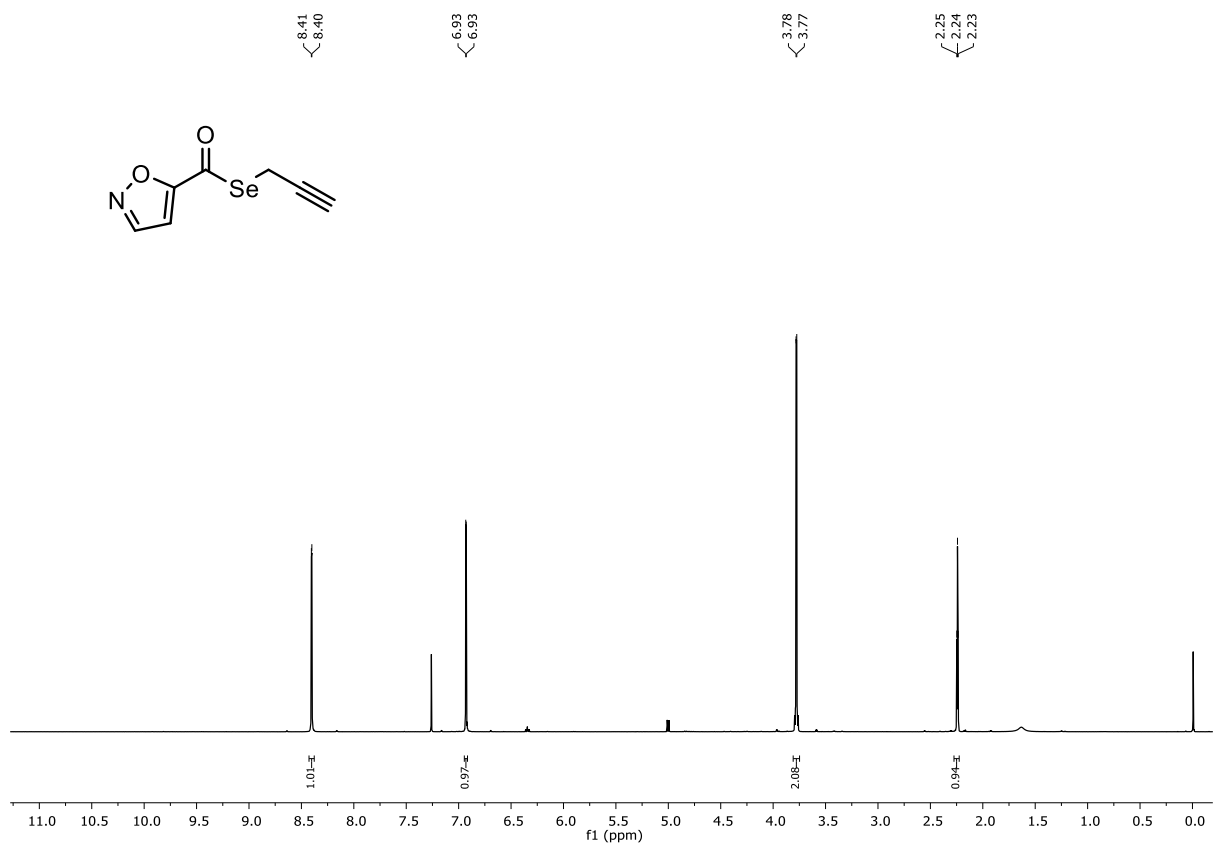

Figure S95. <sup>1</sup>H-NMR spectrum of compound **12b**.

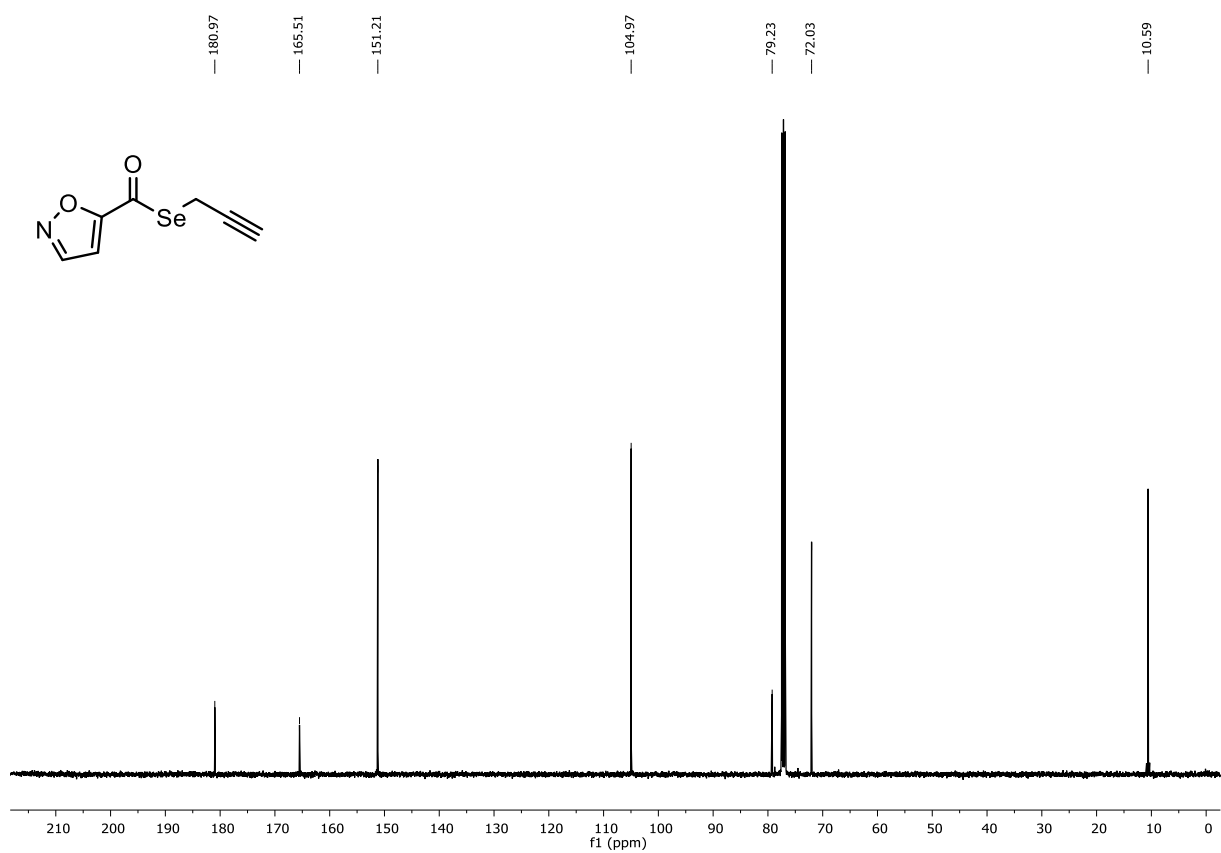

Figure S96. <sup>13</sup>C-NMR spectrum of compound **12b**.

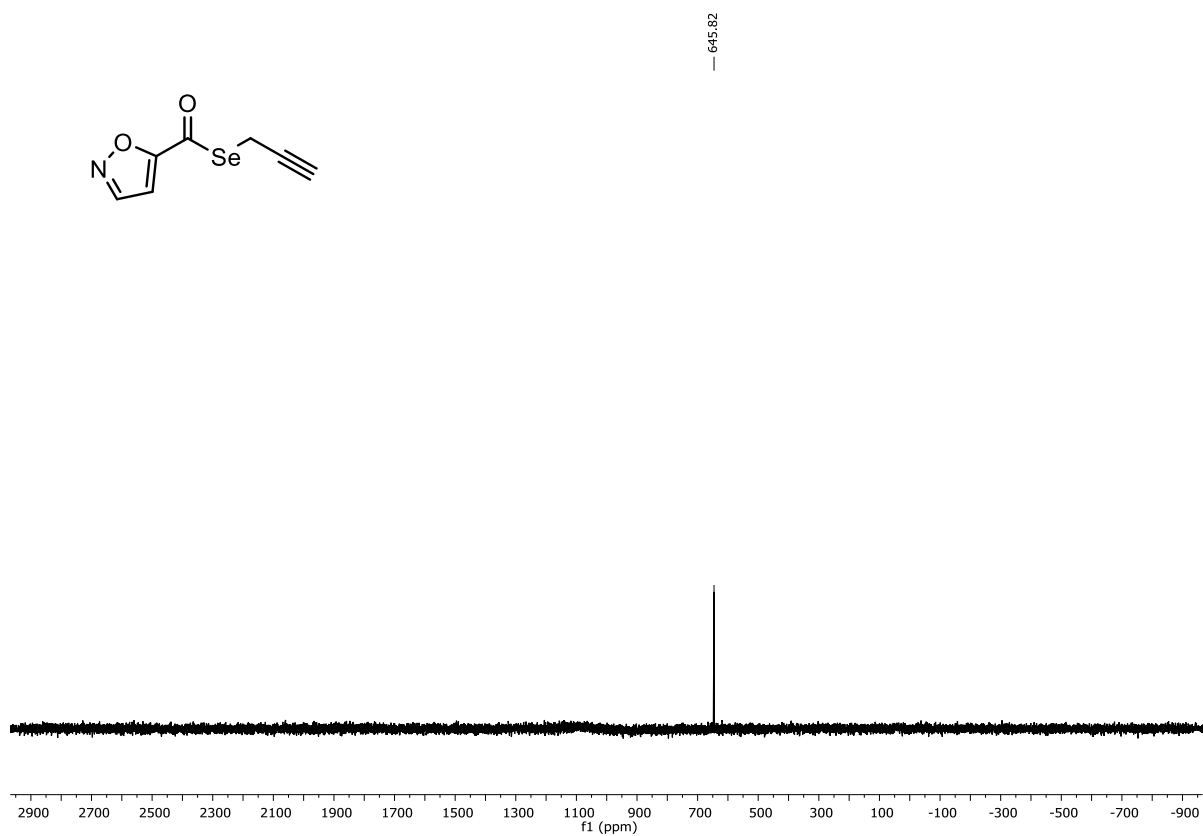

**Figure S97.**  $^{77}\text{Se}$ -NMR spectrum of compound **12b**.

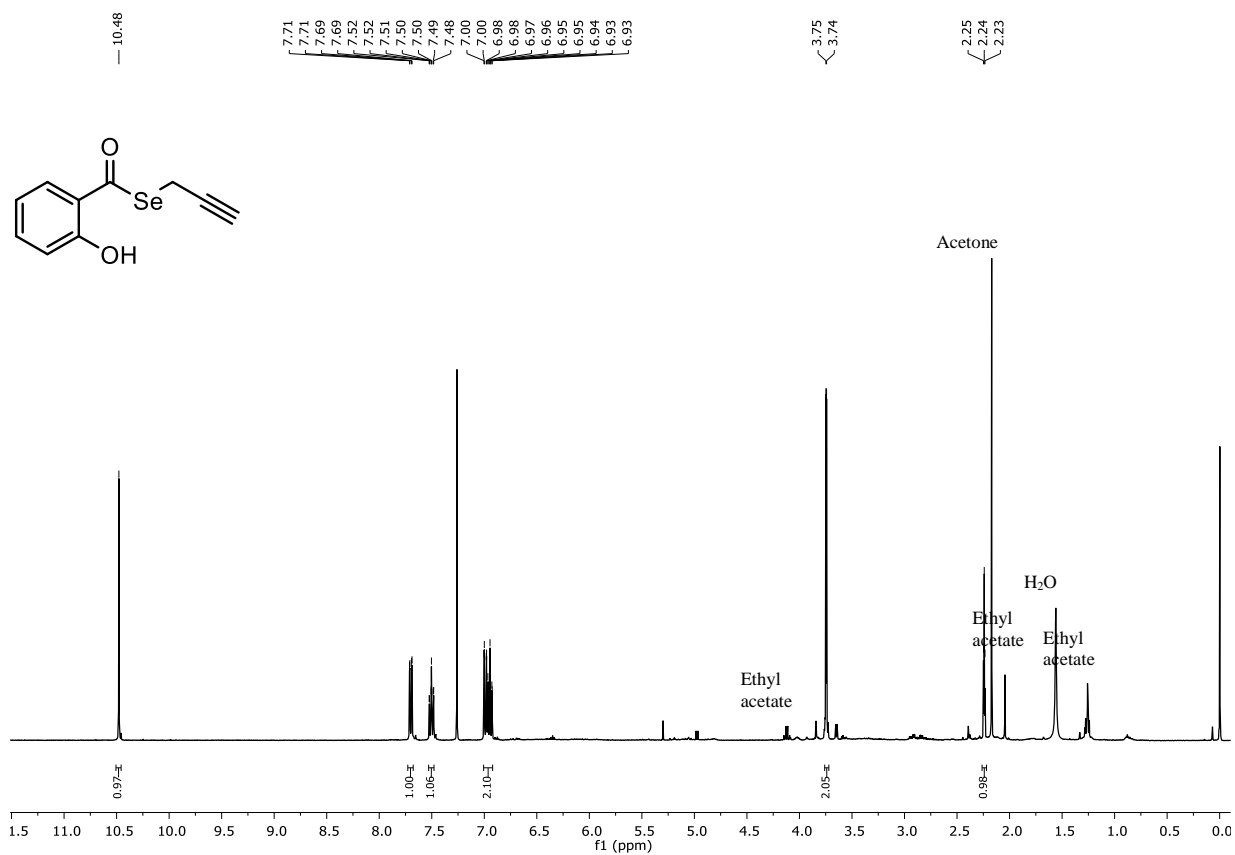

**Figure S98.**  $^1\text{H}$ -NMR spectrum of compound **13b**.

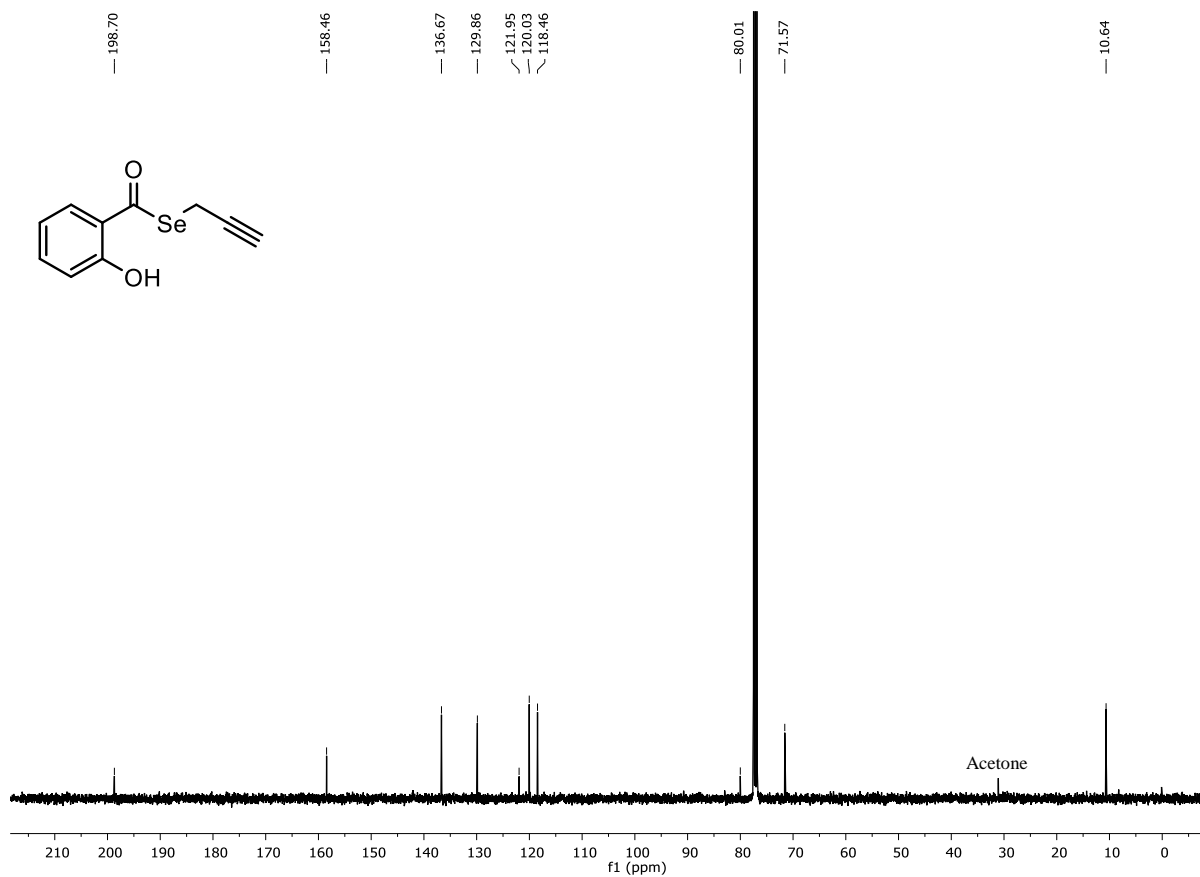

**Figure S99.** <sup>13</sup>C-NMR spectrum of compound **13b**.

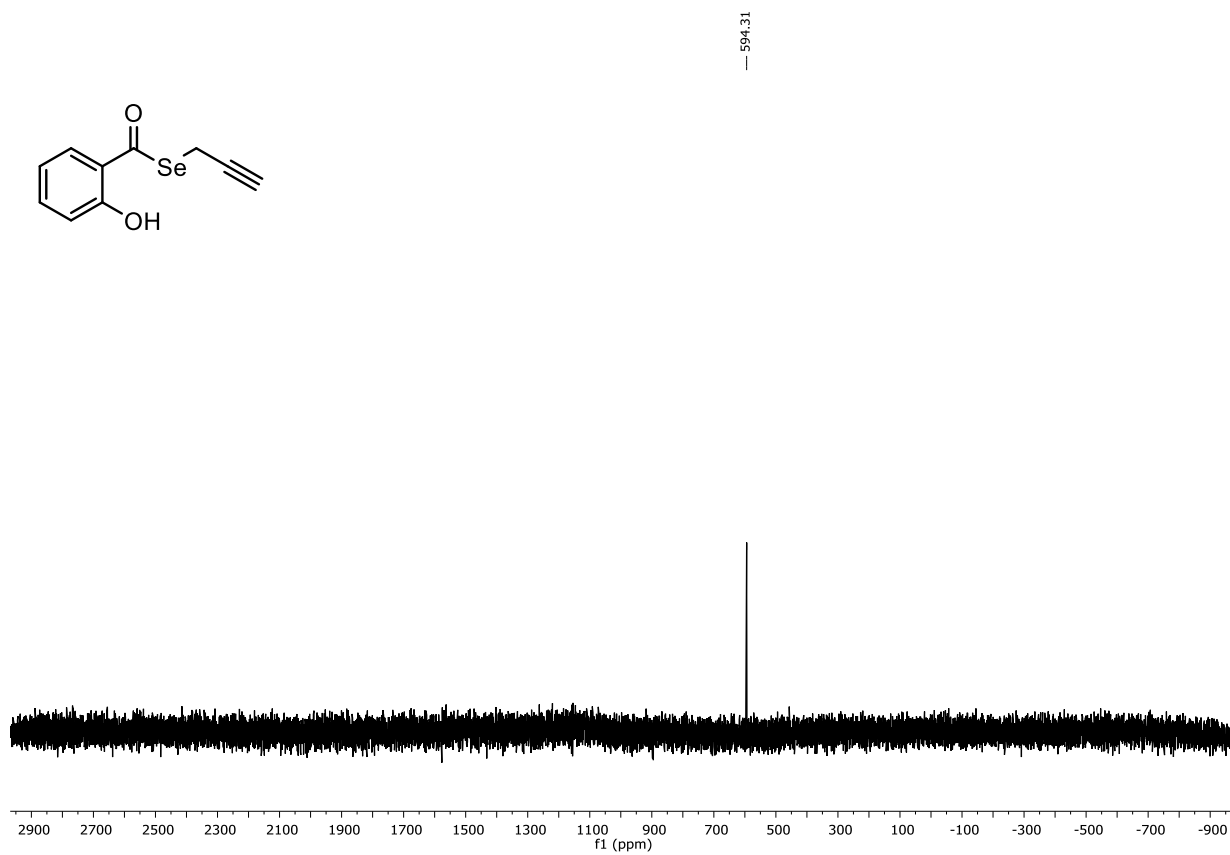

**Figure S100.** <sup>77</sup>Se-NMR spectrum of compound **13b**.

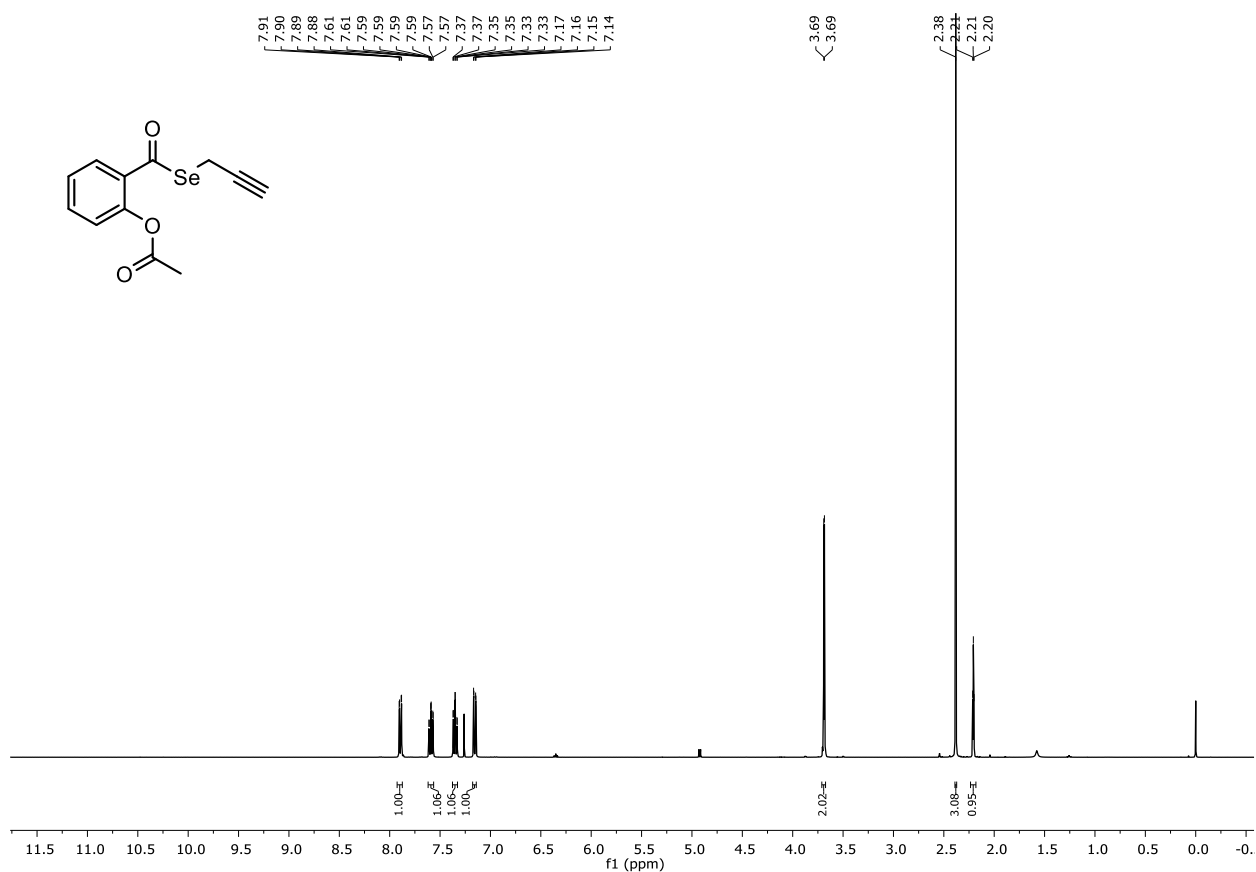

**Figure S101.** <sup>1</sup>H-NMR spectrum of compound **14b**.

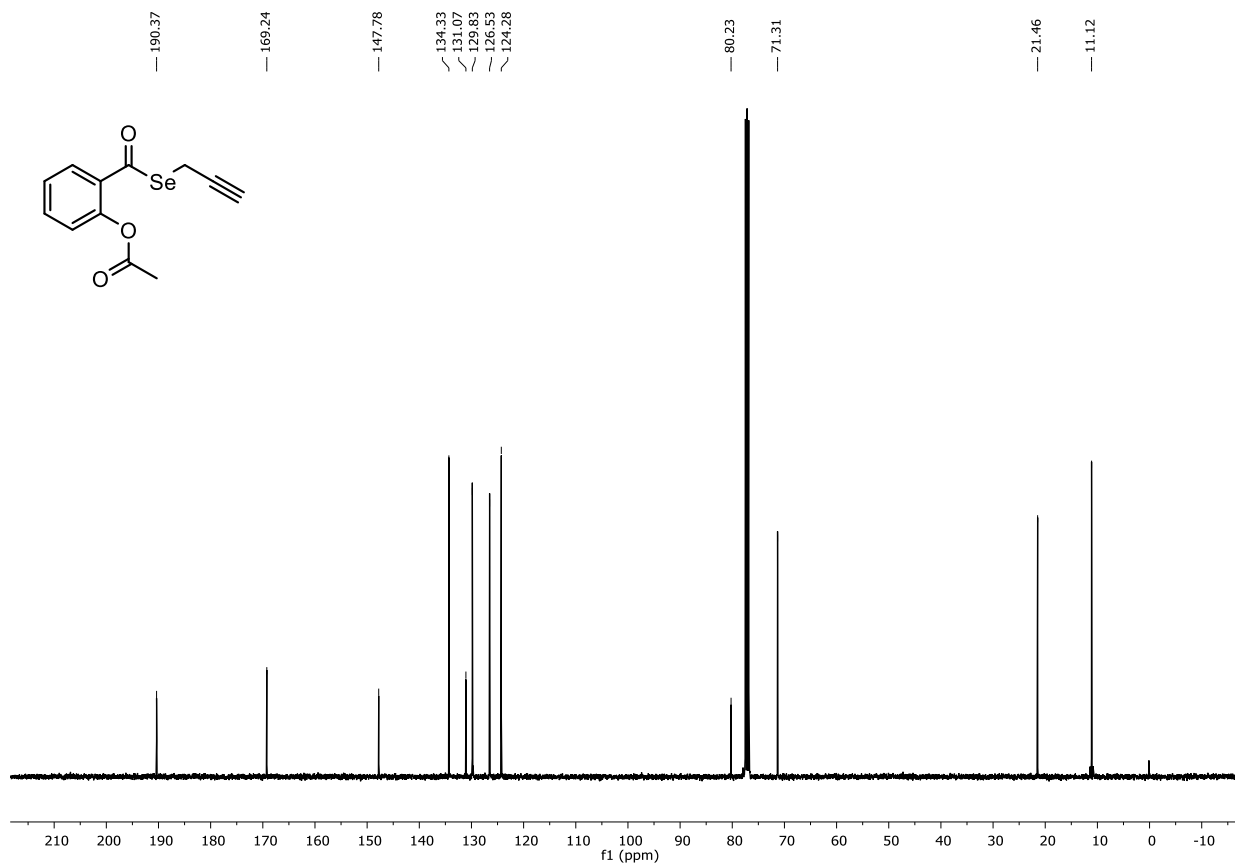

**Figure S102.** <sup>13</sup>C-NMR spectrum of compound **14b**.

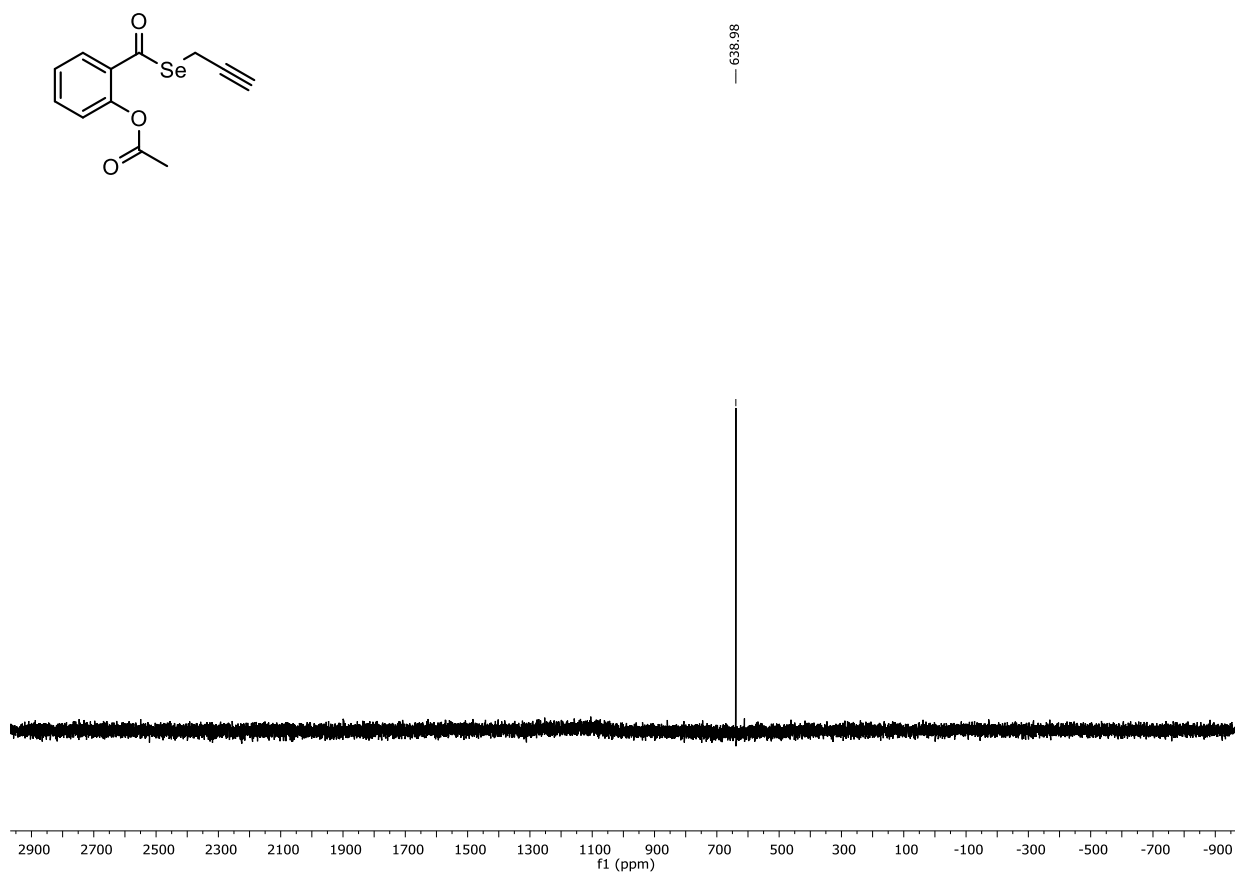

Figure S103. <sup>77</sup>Se-NMR spectrum of compound 14b.

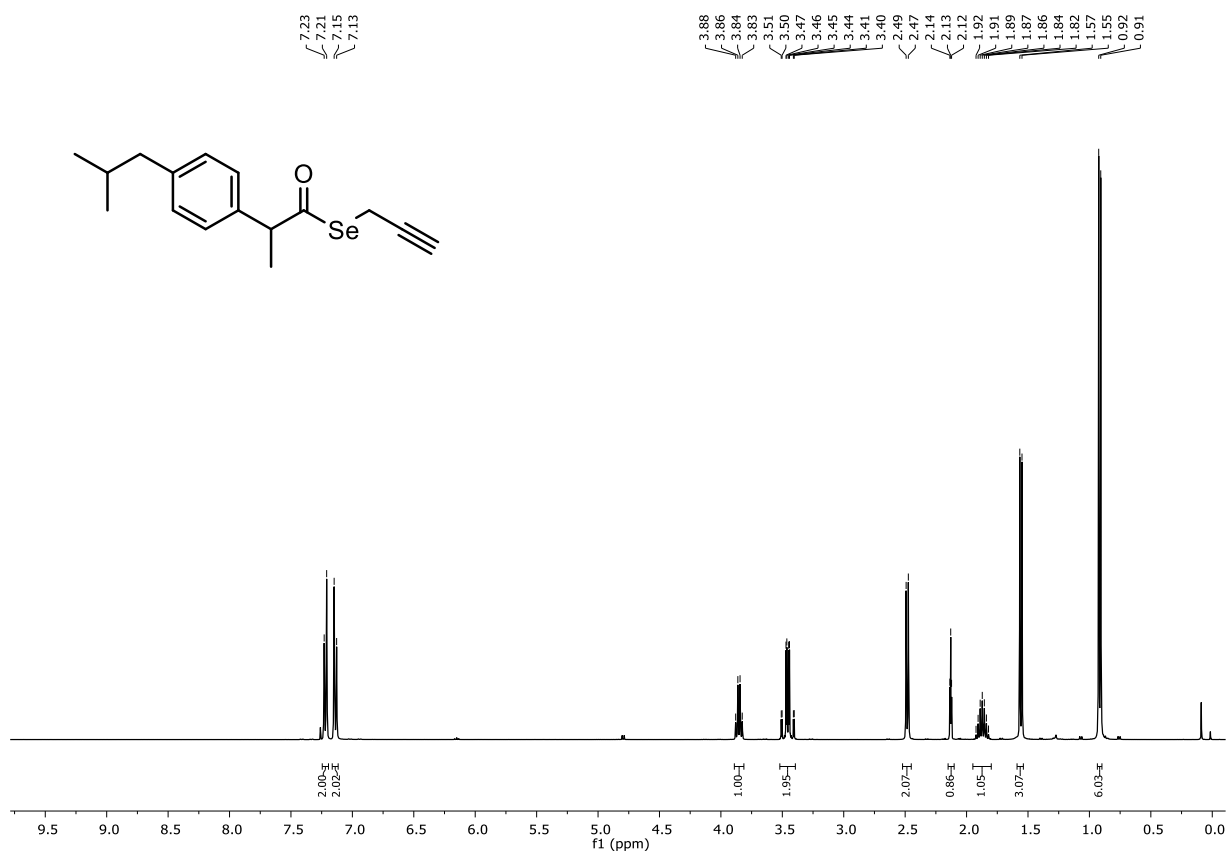

Figure S104. <sup>1</sup>H-NMR spectrum of compound 15b.

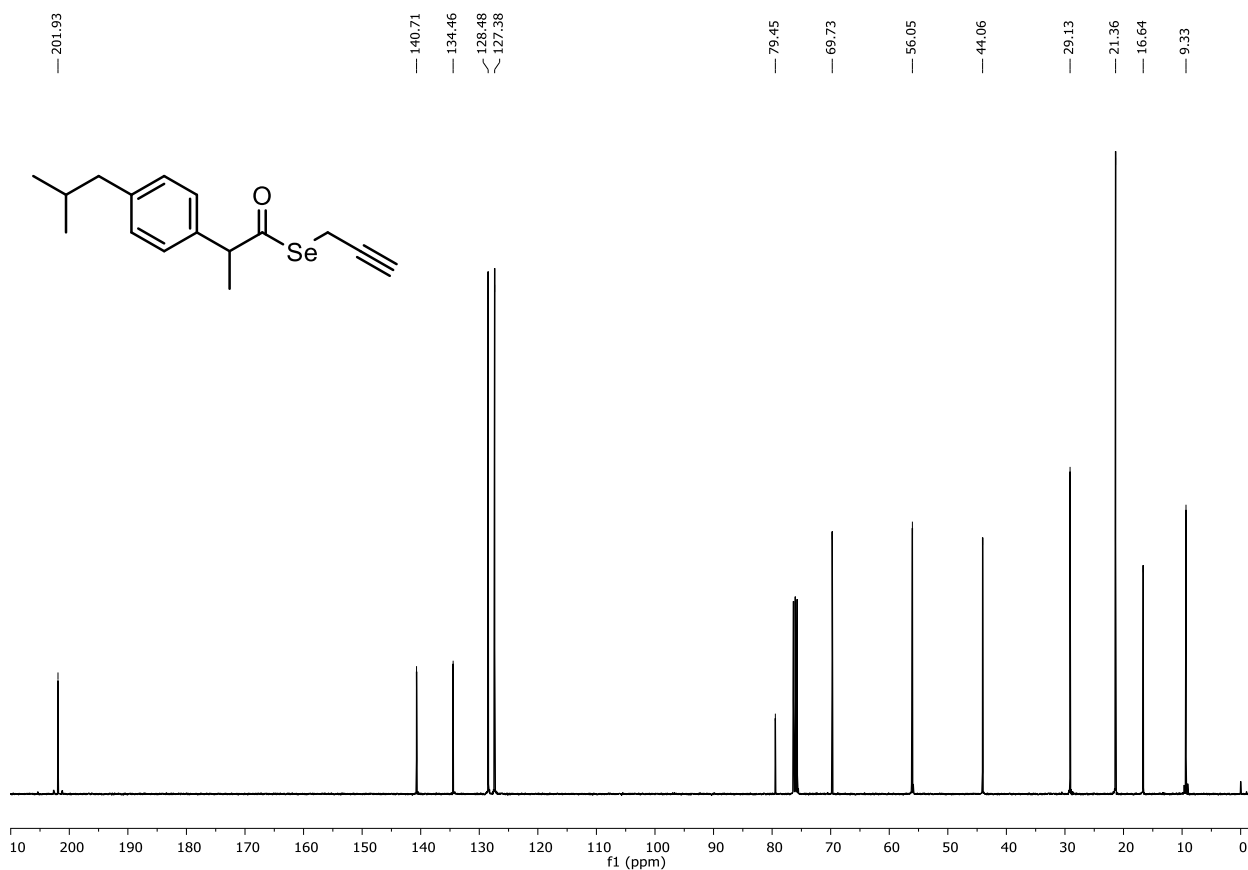

**Figure S105.** <sup>13</sup>C-NMR spectrum of compound **15b**.

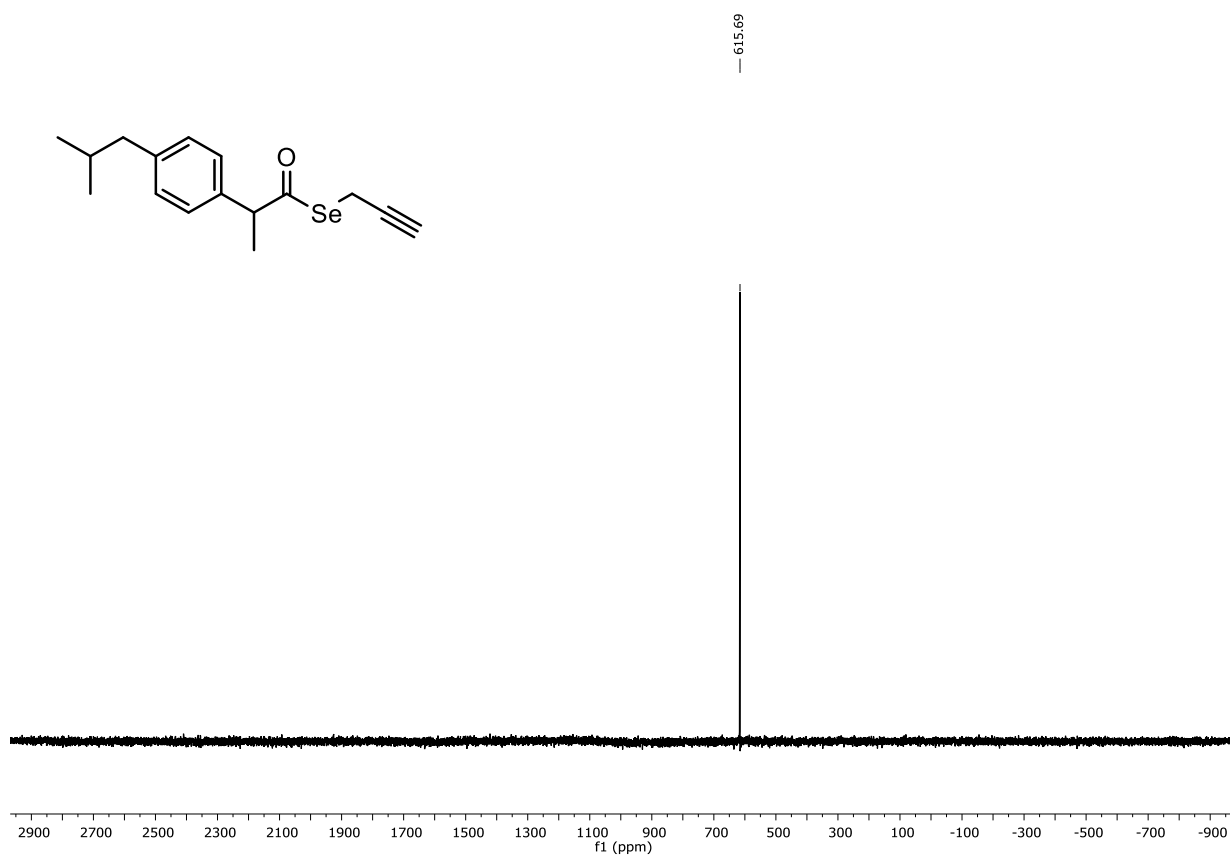

**Figure S106.** <sup>77</sup>Se-NMR spectrum of compound **15b**.

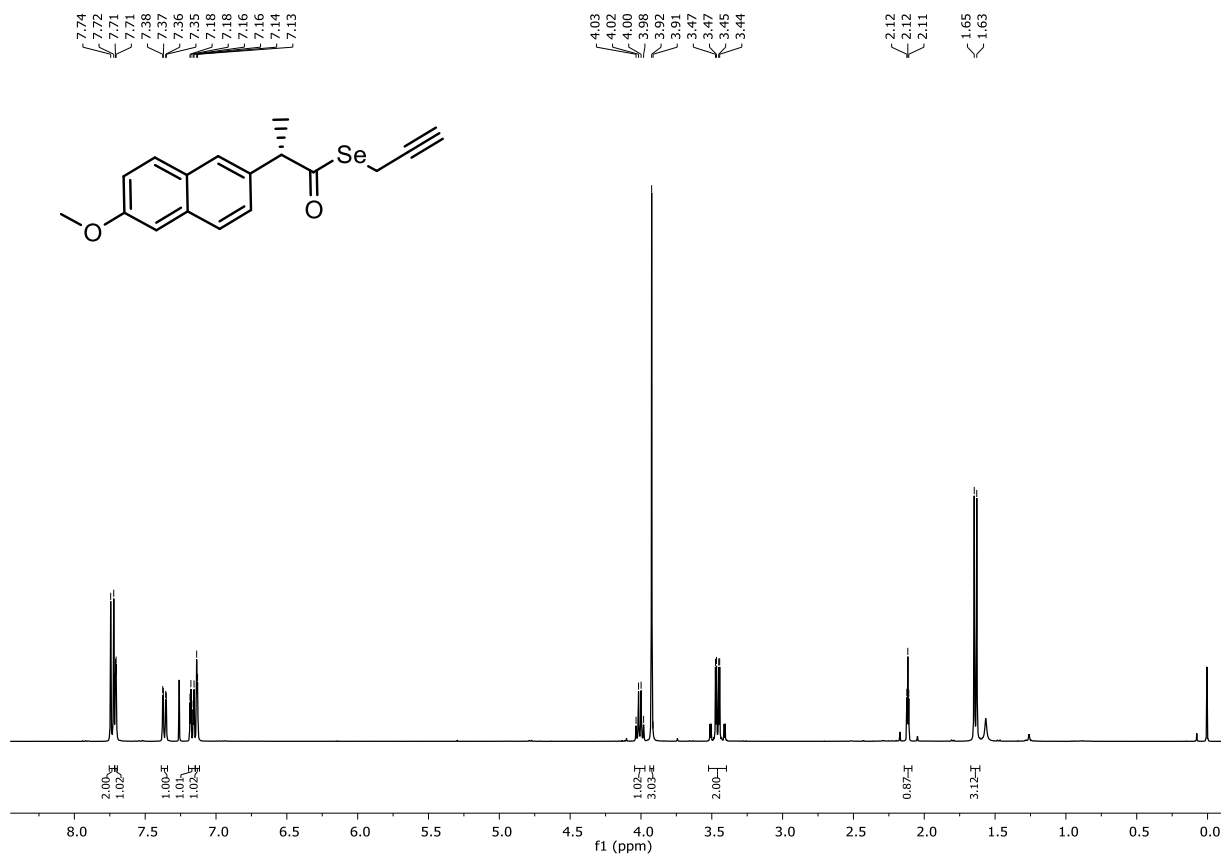

**Figure S107.** <sup>1</sup>H-NMR spectrum of compound **16b**.

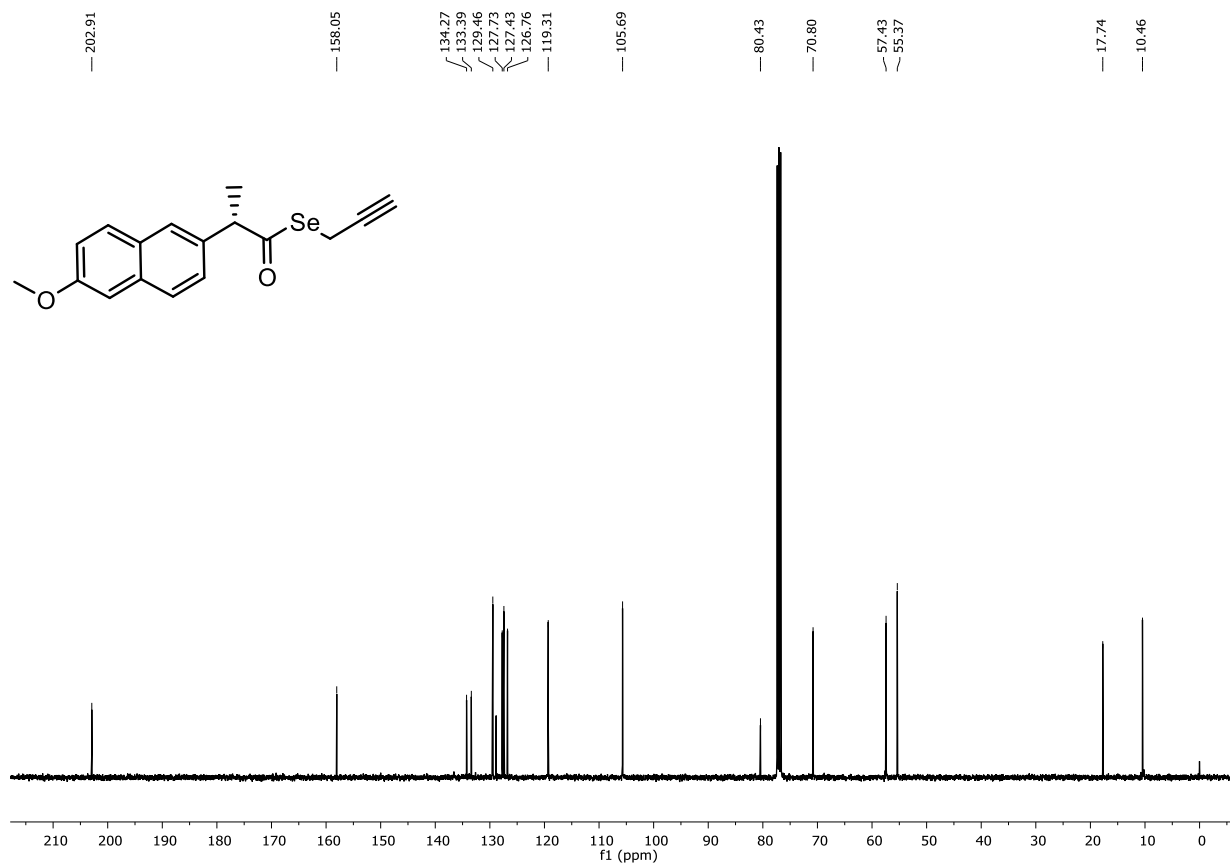

**Figure S108.** <sup>13</sup>C-NMR spectrum of compound **16b**.

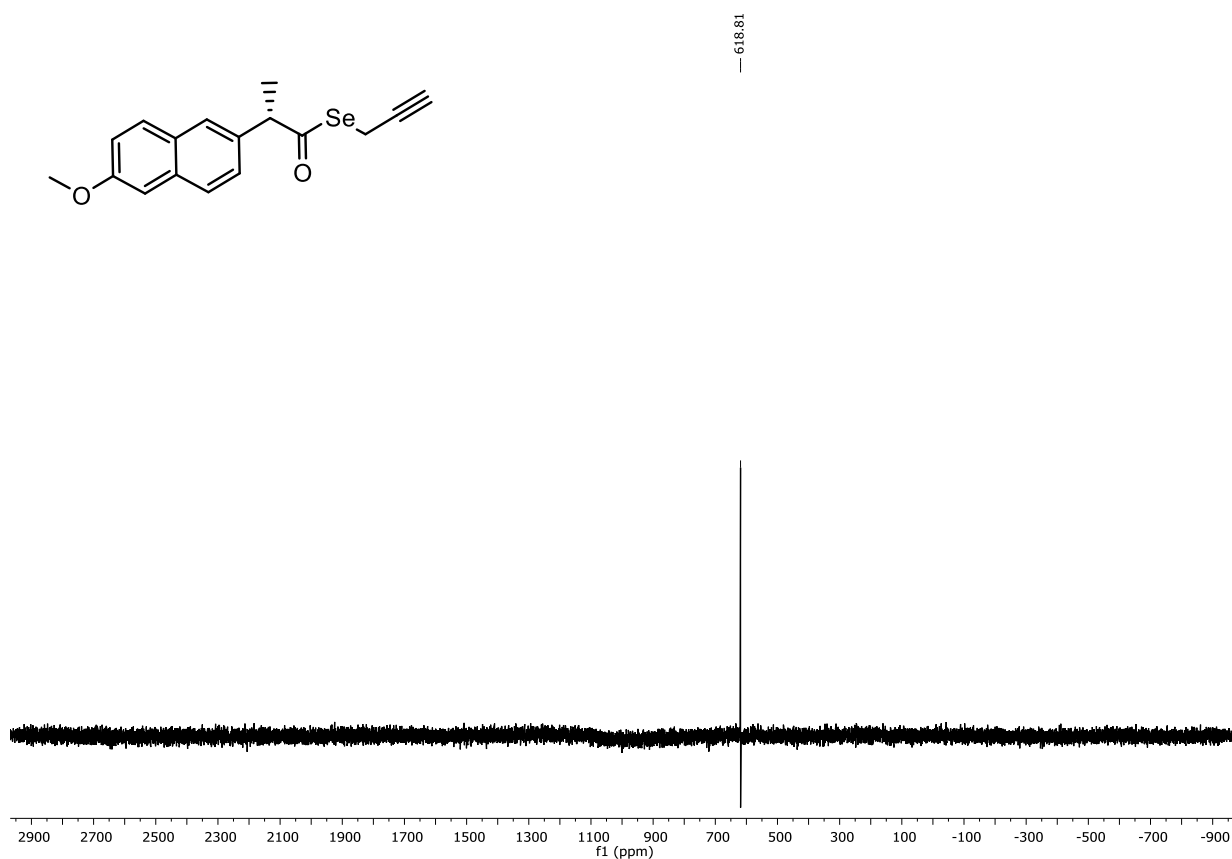

Figure S110.  $^{77}\text{Se}$ -NMR spectrum of compound 16b.

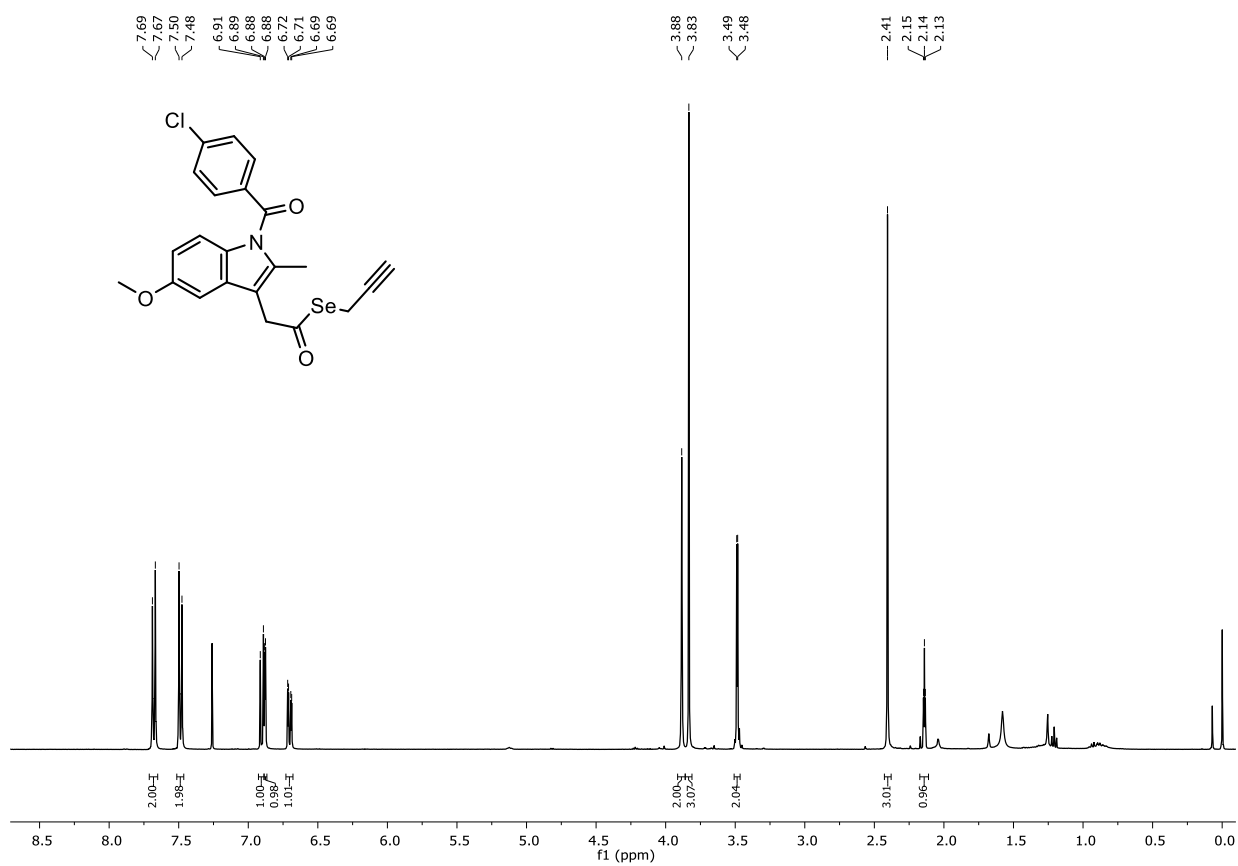

Figure S111.  $^1\text{H}$ -NMR spectrum of compound 17b.



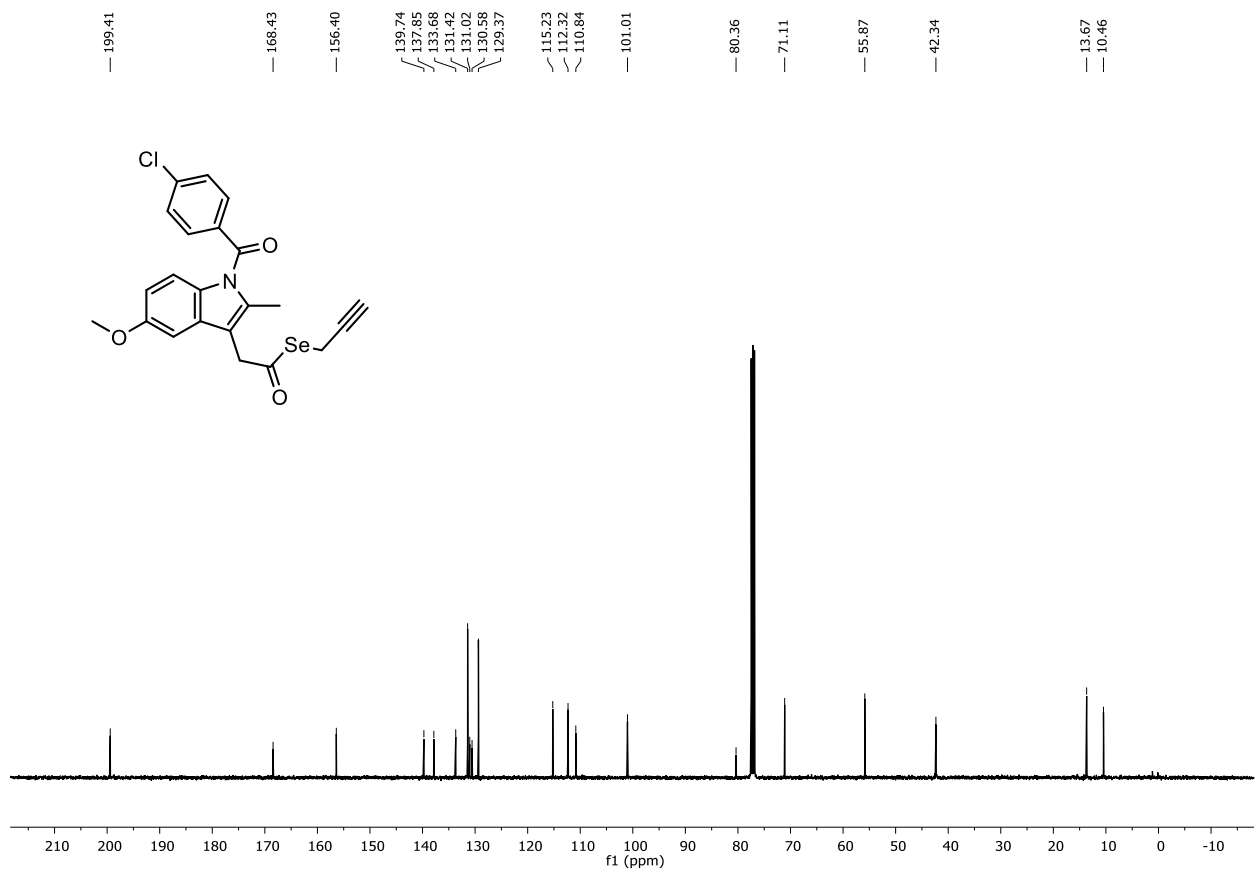

**Figure S112.** <sup>13</sup>C-NMR spectrum of compound **17b**.

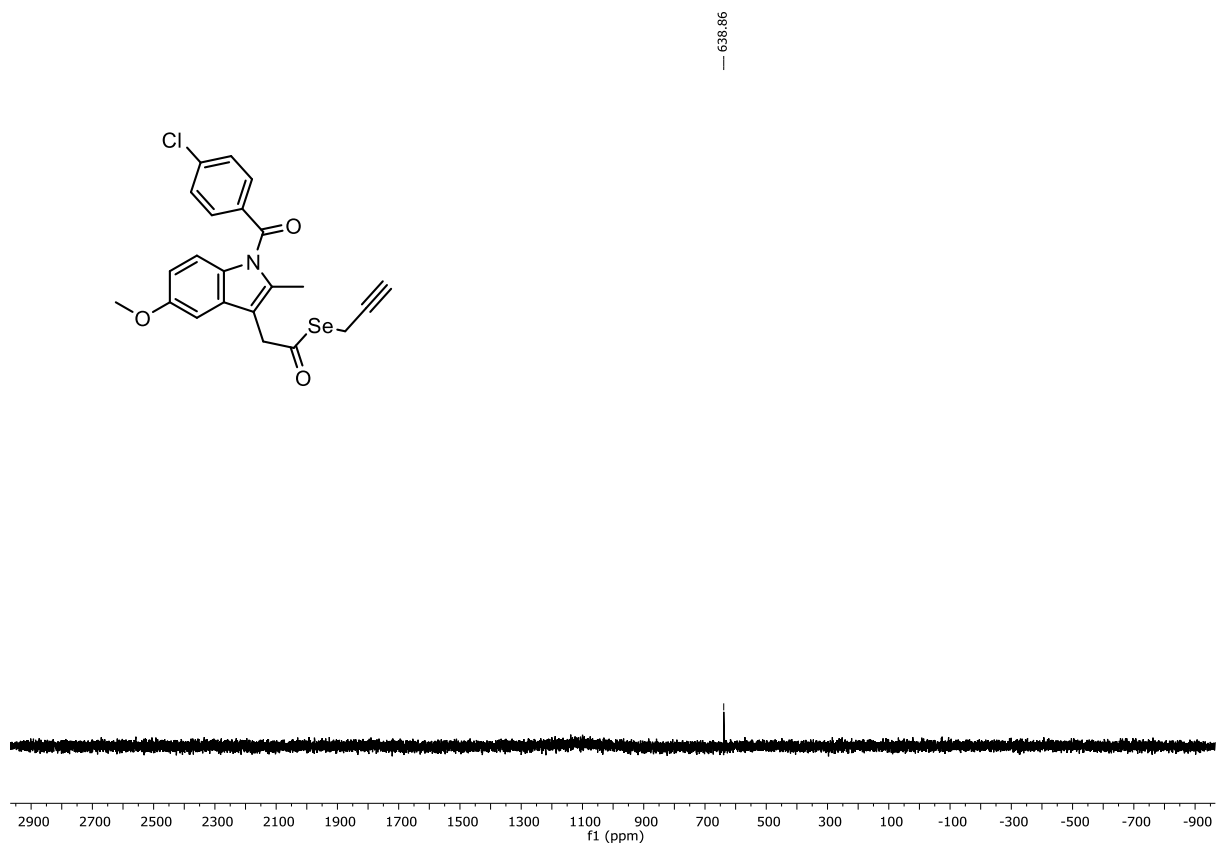

**Figure S113.** <sup>77</sup>Se-NMR spectrum of compound **17b**.

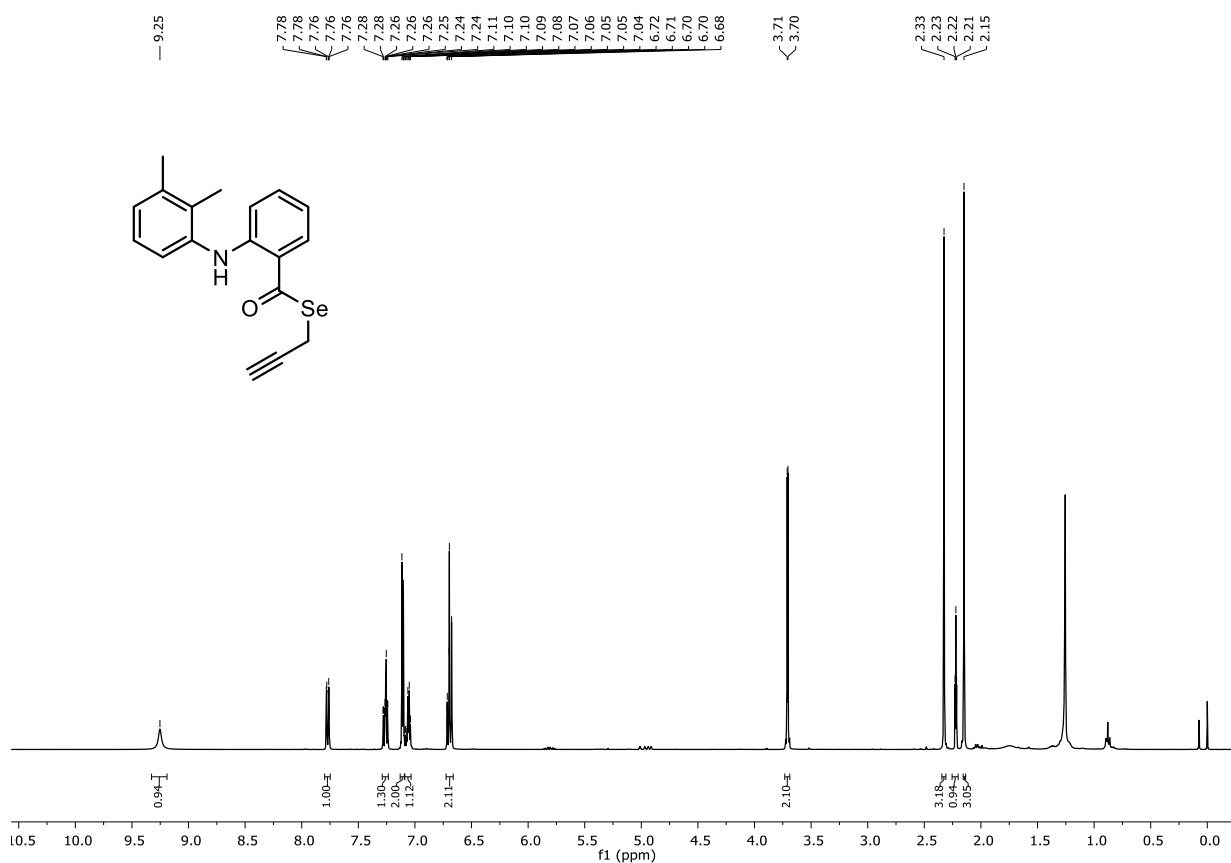

**Figure S114.** <sup>1</sup>H-NMR spectrum of compound **18b**.

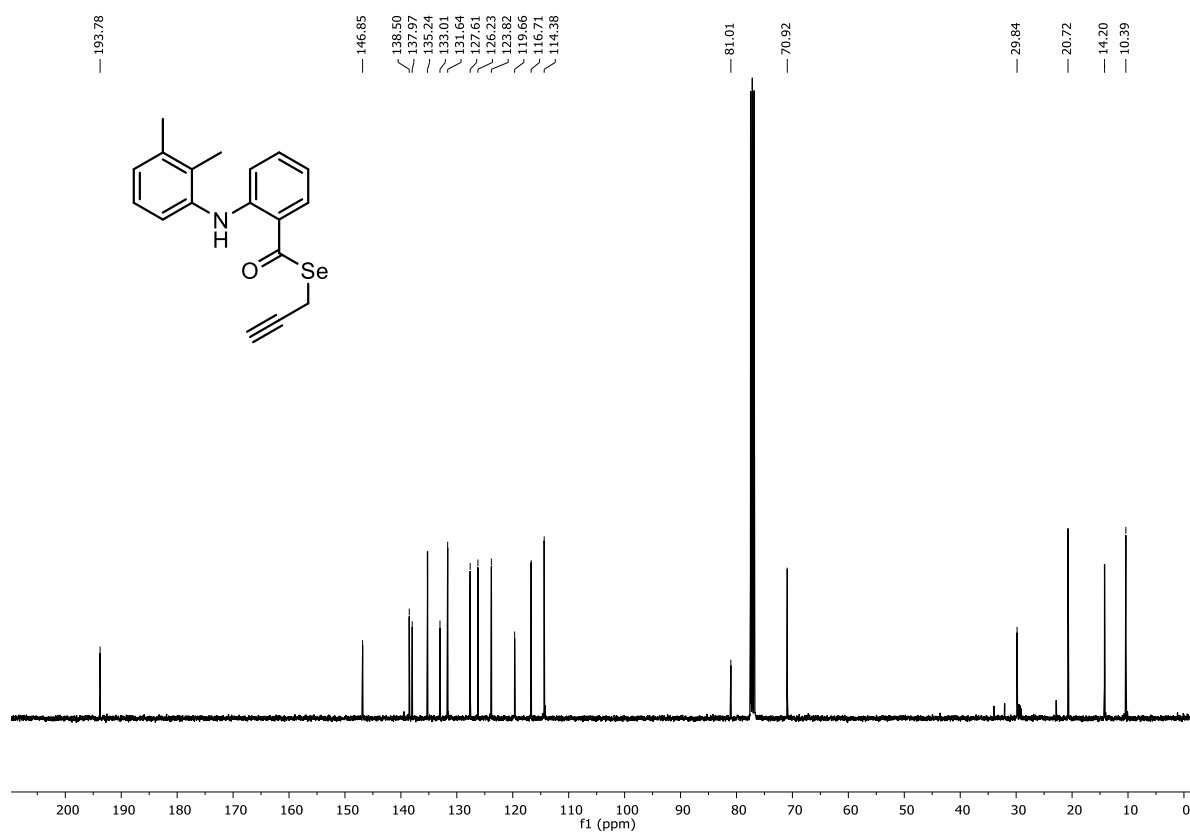

**Figure S115.** <sup>13</sup>C-NMR spectrum of compound **18b**.

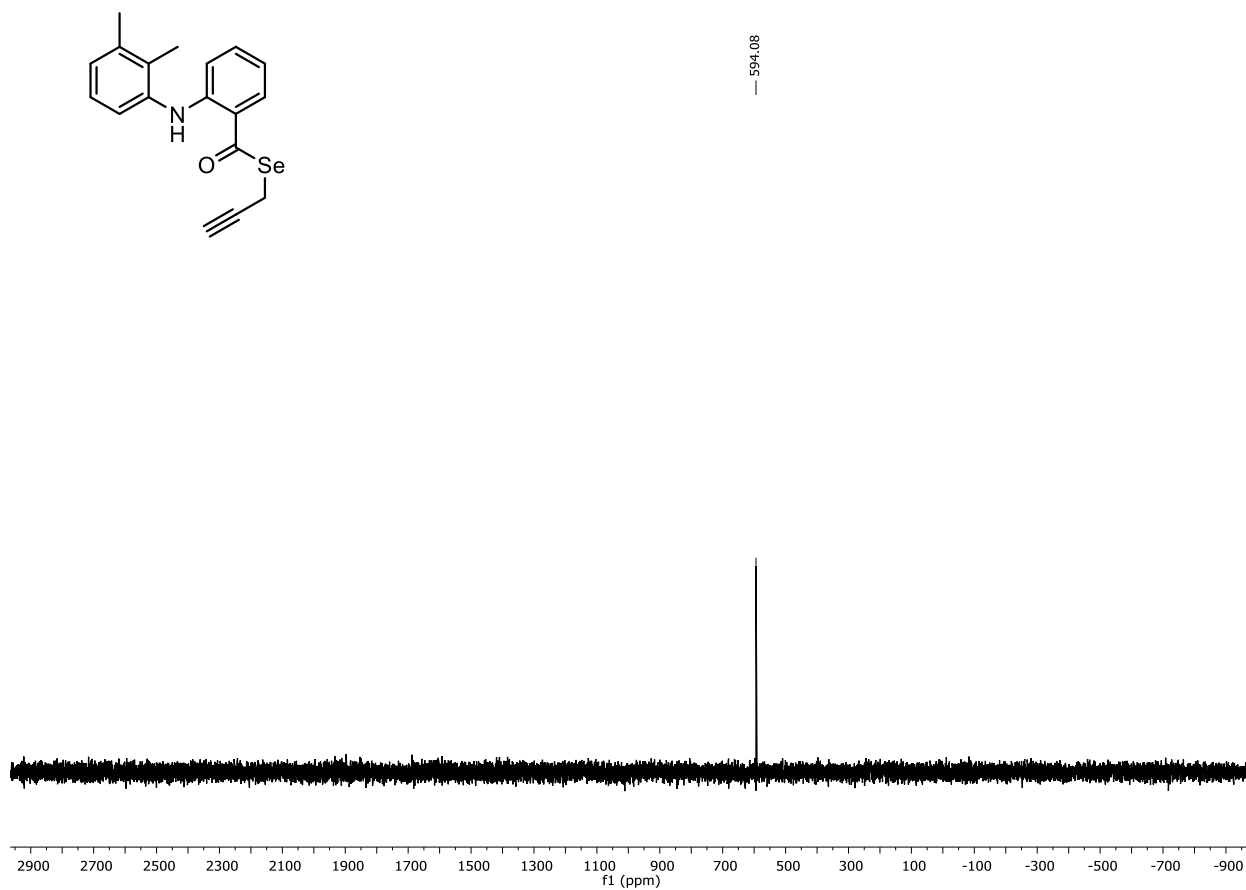

**Figure S116.**  $^{77}\text{Se}$ -NMR spectrum of compound **18b**.

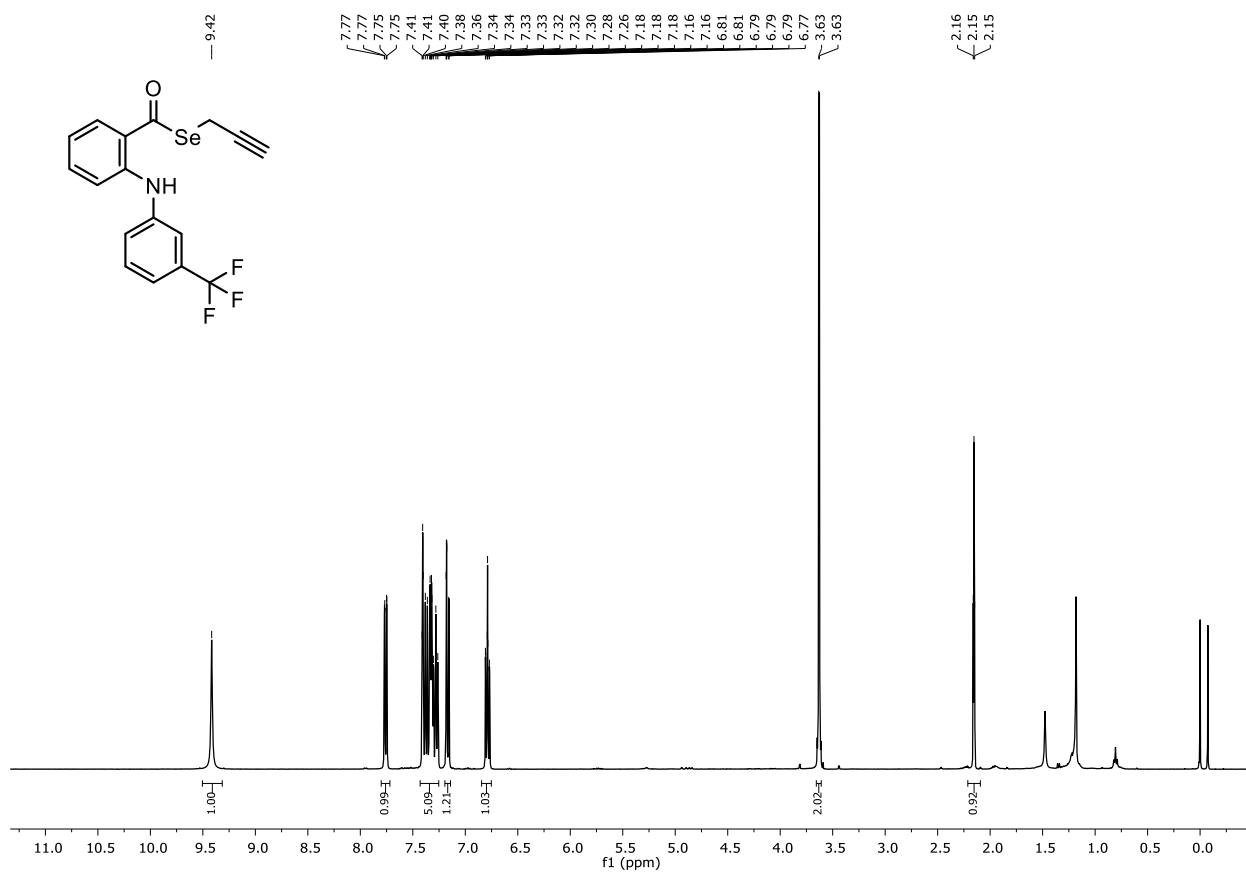

**Figure S117.**  $^1\text{H}$ -NMR spectrum of compound **19b**.

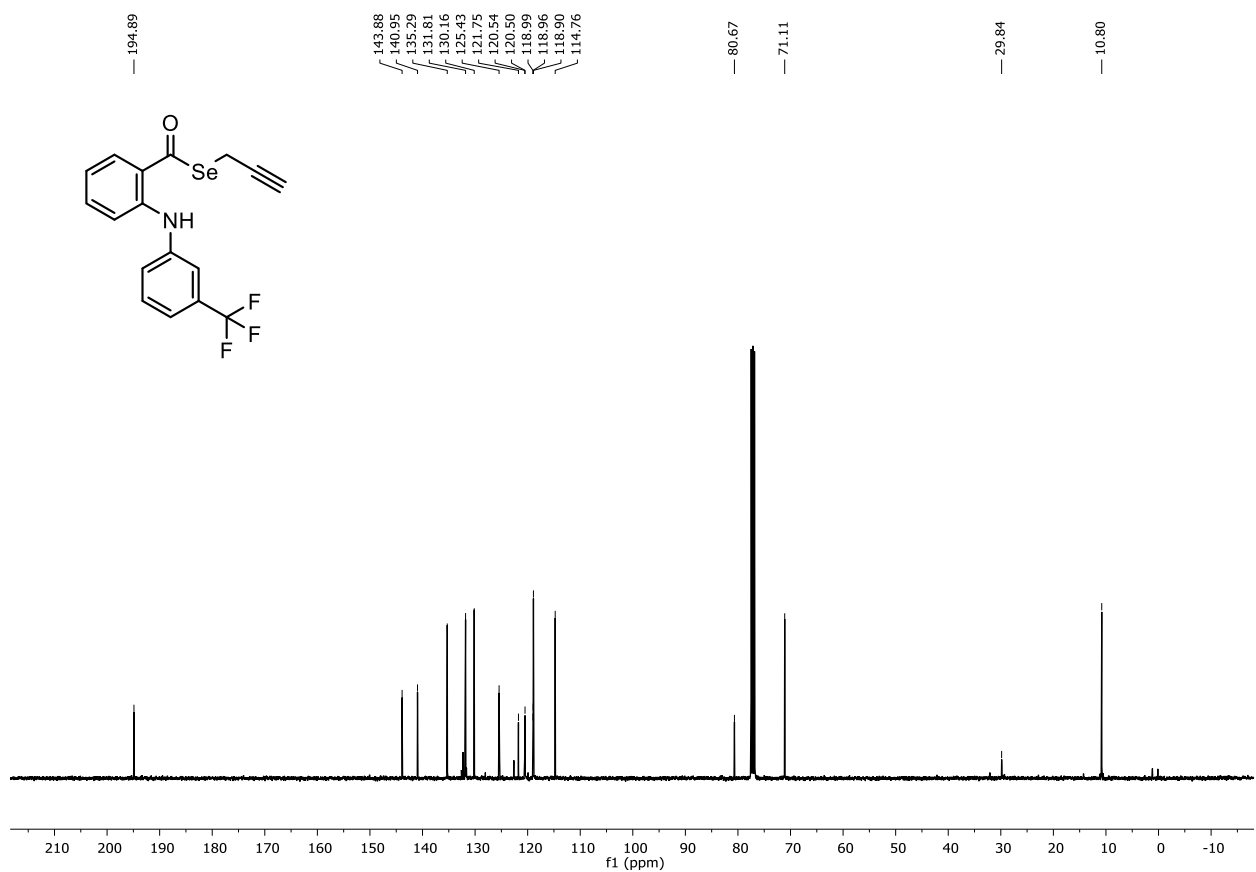

**Figure S118.** <sup>13</sup>C-NMR spectrum of compound **19b**.

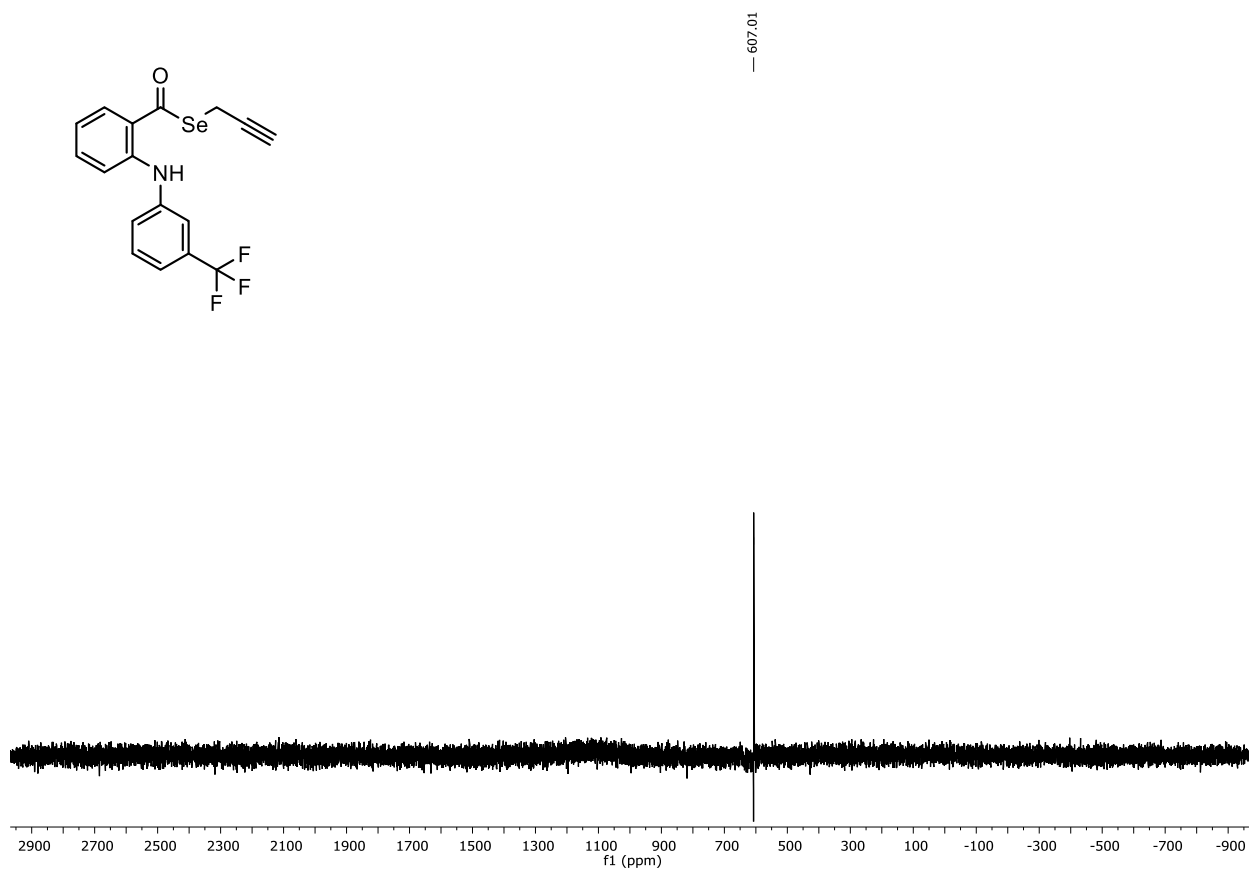

**Figure S119.** <sup>77</sup>Se-NMR spectrum of compound **19b**.
